# Supplementary material for: Contrasting epigenetics of Ixodes scapularis populations
Source: Research Square preprint supplement (doi:10.21203/rs.3.rs-7762123/v1), 2025-10-09
Supplement: Supplementary file 1 [file 35377232c3f1b3194574295f.xlsx]

## Sheet: Table S5 .Hyper_genes_WGBS 
Table S5. Hypermethylated genes were detected in MN ticks in compared to TX ticks using WGBS.
		Gene Information						Protein information					Methylation information				Human homolog information
Gene #	Chromosome	Begin gene	End gene	Orientation	Symbol	Gene ID	Gene Type	Transcripts accession	Protein accession	Protein ID	Protein name	Protein length	qvalue	Meth.diff	Meth. Location	# methylated sites	Human homolog	Putative function human NCBI	Putative function in human GENECARD	Putative fuction Uniprot	Human accession	E-value	GeneID
1	NW_024609839.1	39556942	39668846	plus	LOC120838757	120838757	protein-coding	XM_040208813.2	XP_040064747.2		LOW QUALITY PROTEIN: uncharacterized protein LOC120838757	1269	0.000589732	26.0325	39563994	2	no significant similarity	n/a	n/a	n/a	n/a	n/a	n/a
													0.000178775	28.1609	39564014
2	NW_024609846.1	24825968	25016594	minus	LOC8023308	8023308	protein-coding	XM_029970349.3	XP_029826209.2		uncharacterized protein LOC8023308	133	0.000209929	27.8977	24883711	1	no significant similarity	n/a	n/a	n/a	n/a	n/a	n/a
3	NW_024609846.1	52771079	52806432	plus	LOC115311576	115311576	protein-coding	XM_029970265.3	XP_029826125.3	B7P5D7	uncharacterized protein LOC115311576	340	0.000586426	26.7419	52786792	4	no significant similarity	n/a	n/a	n/a	n/a	n/a	n/a
													0.00106539	26.1061	52786808
													0.000384626	28.1391	52786819
													0.000294588	27.133	52786971
4	NW_024609849.1	92683	93326	plus	LOC120846732	120846732	protein-coding	XM_040218598.2	XP_040074532.1	B7Q3Y4	histone H2B	124	1.01e-12	47.0124	93294	1	Chain D, Histone H2B type 2-E [Homo sapians]	n/a	n/a	n/a	7BXT_D	2e-64	no gene
5	NW_024609849.1	99727	100404	minus	LOC120837197	120837197	protein-coding	XM_040206435.2	XP_040062369.2	B7QDV1	histone H1-III-like	206	5.50082e-51	44.8236	99962	2	Chain U, Histone H1.3 [Homo sapiens]	n/a	n/a	n/a	7XX5_U	9e-10	no gene
													5.50082e-51	43.0059	99964
6	NW_024609857.1	71850851	71897551	plus	LOC8027145	8027145	protein-coding	XM_029986162.3	XP_029842022.3	B7PAU7	leukocyte elastase inhibitor-like	418	0.00070992	29.42	71873024	2	SCCA2/SCCA1 fusion protein isoform 1 [Homo sapiens]	Enables cysteine-type endopeptidase inhibitor activity; protease binding activity; and virus receptor activity. Involved in several processes, including autocrine signaling; paracrine signaling; and regulation of cellular protein metabolic process. Located in cytoplasmic vesicle; extracellular exosome; and nucleus. [provided by Alliance of Genome Resources, Apr 2022]	SERPINB3 (Serpin Family B Member 3) is a Protein Coding gene. Diseases associated with SERPINB3 include Lung Non-Small Cell Carcinoma and Squamous Cell Carcinoma. Among its related pathways are Innate Immune System and Pancreatic cancer subtypes. Gene Ontology (GO) annotations related to this gene include serine-type endopeptidase inhibitor activity and cysteine-type endopeptidase inhibitor activ…	May act as a papain-like cysteine protease inhibitor to modulate the host immune response against tumor cells. Also functions as an inhibitor of UV-induced apoptosis via suppression of the activity of c-Jun NH(2)-terminal kinase (JNK1). ( SPB3_HUMAN,P29508 )	AAQ04770.1	5e-54	SERPINB3
													0.0046834	25.2674	71873036
7	NW_024609857.1	166421000	166423030	minus	LOC115317095	115317095	protein-coding	XM_029976627.4	XP_029832487.2		uncharacterized protein LOC115317095	264	1.85023e-05	27.3873	166422007	2	no significant similarity	n/a	n/a	n/a	n/a	n/a	n/a
													9.61972e-05	26.8048	166422014
8	NW_024609868.1	16700930	16771943	minus	LOC8032474	8032474	protein-coding	XM_029991195.4	XP_029847055.3	B7PWN6	histone-lysine N-methyltransferase EHMT2 isoform X1	1268	4.39056e-05	27.4296	16737128	6	histone-lysine N-methyltransferase EHMT1 isoform X11 [Homo sapiens]	The protein encoded by this gene is a histone methyltransferase that methylates the lysine-9 position of histone H3. This action marks the genomic region packaged with these methylated histones for transcriptional repression. This protein may be involved in the silencing of MYC- and E2F-responsive genes and therefore could play a role in the G0/G1 cell cycle transition. Defects in this gene are a…	EHMT1 (Euchromatic Histone Lysine Methyltransferase 1) is a Protein Coding gene. Diseases associated with EHMT1 include Kleefstra Syndrome 1 and Kleefstra Syndrome. Among its related pathways are Gene expression (Transcription) and Regulation of TP53 Activity. Gene Ontology (GO) annotations related to this gene include methyltransferase activity and obsolete histone lysine N-methyltransferase act…	Histone methyltransferase that specifically mono- and dimethylates 'Lys-9' of histone H3 (H3K9me1 and H3K9me2, respectively) in euchromatin. H3K9me represents a specific tag for epigenetic transcriptional repression by recruiting HP1 proteins to methylated histones. Also weakly methylates 'Lys-27' of histone H3 (H3K27me). Also required for DNA methylation, the histone methyltransferase activity i…	XP_016870627.1	0	EHMT1
													9.43147e-06	27.9347	16737134
													1.15375e-06	29.096	16737149
													4.83147e-05	25.3676	16737152
													1.52913e-05	26.8197	16737156
													0.000123766	25.09	16737165
9	NW_024609883.1	40398264	40416351	plus	LOC115313994	115313994	protein-coding	XM_040219417.2	XP_040075351.1	B7PLM5	uncharacterized protein LOC115313994	611	0.00518449	30.2773	40412198	1	no significant similarity	n/a	n/a	n/a	n/a	n/a	n/a
10	NW_024609883.1	65323940	65412104	minus	LOC8033572	8033572	protein-coding	XM_042286870.1	XP_042142804.1	B7PZ88	sodium- and chloride-dependent glycine transporter 2	648	4.64882e-06	25.0575	65406257	2	glycine type 2 transporter variant SC6 [Homo sapiens]	This gene encodes a sodium- and chloride-dependent glycine neurotransmitter transporter. This integral membrane glycoprotein is responsible for the clearance of extracellular glycine during glycine-mediated neurotransmission. This protein is found in glycinergic axons and maintains a high presynaptic pool of neurotransmitter at glycinergic synapses. Mutations in this gene cause hyperekplexia; a h…	SLC6A5 (Solute Carrier Family 6 Member 5) is a Protein Coding gene. Diseases associated with SLC6A5 include Hyperekplexia 3 and Hyperekplexia. Among its related pathways are Transport of inorganic cations/anions and amino acids/oligopeptides and Disorders of transmembrane transporters. Gene Ontology (GO) annotations related to this gene include neurotransmitter:sodium symporter activity and glyci…	Sodium- and chloride-dependent glycine transporter (PubMed:10381548, 10606742, 16751771, 31370103, 9845349). Terminates the action of glycine by its high affinity sodium-dependent reuptake into presynaptic terminals (PubMed:9845349). May be responsible for the termination of neurotransmission at strychnine-sensitive glycinergic synapses (PubMed:9845349). ( SC6A5_HUMAN,Q9Y345 ) [Isoform 2]: Lacks …	AAK29670.1	2e-180	SLC6A5
													0.00135759	25.1269	65407075
11	NW_024609912.1	103568	106341	plus	LOC121833955	121833955	protein-coding	XM_042287670.1	XP_042143604.1	B7Q8X1	uncharacterized protein LOC121833955	637	5.81796e-05	26.9886	104168	27	no significant similarity	n/a	n/a	n/a	n/a	n/a	n/a
													0.000272833	25.6349	104184
													7.65594e-07	30.949	104220
													8.08663e-06	28.8889	104228
													4.87964e-06	29.8005	104242
													5.86675e-06	29.9675	104247
													8.07958e-08	34.1959	104261
													1.02101e-06	31.677	104266
													4.88689e-09	37.0309	104279
													2.04566e-09	36.4193	104291
													9.81849e-07	31.5	104294
													1.48606e-05	29.6649	104312
													6.1072e-06	30.1359	104315
													5.29501e-06	30.1449	104320
													0.00588196	25.7712	104450
													0.00422134	25.4808	104481
													0.00263766	25.0571	104520
													0.000113	30.3343	104523
													6.94557e-05	31.0303	104526
													0.000311594	28.0603	104529
													0.00135578	25.626	104531
													3.3502e-05	31.6176	104546
													0.000416129	27.5381	104549
													0.000497812	28.9979	104551
													7.50388e-05	30.4511	104600
													3.51836e-05	31.7962	104613
													0.00133037	26.2443	104724

## Sheet: Table S6.Hypo_genes_WGBS
Table S6. Hypomethylated genes were detected in MN ticks in compared to TX ticks using WGBS.
		Gene information						Protein information					Methylation information				Human homolog information
Gene #	Chromosome	Begin gene	End gene	Orientation	Symbol	Gene ID	Gene Type	Transcripts accession	Protein accession	Protein ID	Protein name	Protein length	qvalue	Meth.diff	Meth. Location	# methylated sites	Human homolog	Putative function human NCBI	Putative function in human GENECARD	Putative fuction Uniprot	Human accession	E-value	GeneID
1	NW_024609835.1	36413274	36947414	plus	LOC8027741	8027741	protein-coding	XM_042292876.1	XP_042148810.1	B7PC65	neural cell adhesion molecule 1	437	7.7e-05	-25.1711	36454128	1	NCAM1 protein [Homo sapiens]	This gene encodes a cell adhesion protein which is a member of the immunoglobulin superfamily. The encoded protein is involved in cell-to-cell interactions as well as cell-matrix interactions during development and differentiation. The encoded protein plays a role in the development of the nervous system by regulating neurogenesis, neurite outgrowth, and cell migration. This protein is also invol…	NCAM1 (Neural Cell Adhesion Molecule 1) is a Protein Coding gene. Diseases associated with NCAM1 include Rabies and Bile Duct Cancer. Among its related pathways are MAPK family signaling cascades and Nervous system development. Gene Ontology (GO) annotations related to this gene include identical protein binding. An important paralog of this gene is NCAM2.	This protein is a cell adhesion molecule involved in neuron-neuron adhesion, neurite fasciculation, outgrowth of neurites, etc. ( NCAM1_HUMAN,P13591 ) (Microbial infection) Acts as a receptor for rabies virus. ( NCAM1_HUMAN,P13591 ) (Microbial infection) Acts as a receptor for Zika virus. ( NCAM1_HUMAN,P13591 )	AAH29119.1	1e-26	NCAM1
2	NW_024609835.1	105394146	105414072	minus	LOC121837120	121837120	protein-coding	XM_042292599.1	XP_042148533.1		uncharacterized protein LOC121837120	453	0.000347304	-30.3732	105411982	4	no significant similarity found	n/a	n/a	n/a	n/a	n/a	n/a
													0.000245423	-32.1998	105411993
													0.000256882	-32.4532	105412010
													2.9513e-05	-34.7618	105412019
3	NW_024609835.1	116715721	116826138	plus	LOC120851086	120851086	protein-coding	XM_040223638.1	XP_040079572.1		uncharacterized protein LOC120851086	386	4.9247e-06	-38.5192	116735013	2	no significant similarity found	n/a	n/a	n/a	n/a	n/a	n/a
													9.4038e-07	-40.0909	116735021
4	NW_024609835.1	124683693	124781968	plus	LOC8053961	8053961	protein-coding	XM_029973895.3	XP_029829755.3		enhancer of polycomb homolog 1	779	9.92429e-06	-25.1701	124703897	7	enhancer of polycomb homolog 1 [Homo sapiens]	n/a	n/a	n/a	KAI4075633.1	1e-178	no gene
													1.21847e-05	-25.1098	124703903
													1.00817e-05	-25.5753	124703929
													3.61708e-08	-29.5359	124703934
													4.87761e-08	-30.7416	124703936
													9.84533e-06	-28.2787	124703968
													2.34734e-05	-27.1329	124703972
5	NW_024609835.1	136822992	137018424	minus	LOC8036091	8036091	protein-coding	XM_029987983.4	XP_029843843.3		E3 ubiquitin-protein ligase TTC3 isoform X2	1709	0.000370613	-29.0569	136967306	6	tetratricopeptide repeat domain 3 [Homo sapiens]	n/a	n/a	n/a	KAI2596150.1	2e-26	no gene
													1.75316e-09	-29.993	136967346
													2.32076e-06	-26.1271	136967355
													5.04447e-12	-33.3566	136967361
													2.09553e-06	-25.6484	136967364
													1.23916e-07	-27.3876	136967416
6	NW_024609835.1	138609930	139070069	plus	LOC8024530	8024530	protein-coding	XM_042289920.1	XP_042145854.1	B7P4K4	poly(rC)-binding protein 3 isoform X1	401	6.76765e-05	-26.8947	138731907	28	poly(rC)-binding protein 3 isoform 7 [Homo sapiens]	This gene encodes a member of the KH-domain protein subfamily. Proteins of this subfamily, also referred to as alpha-CPs, bind to RNA with a specificity for C-rich pyrimidine regions. Alpha-CPs play important roles in post-transcriptional activities and have different cellular distributions. The protein encoded by this gene lacks the nuclear localization signals found in other subfamily members. …	PCBP3 (Poly(RC) Binding Protein 3) is a Protein Coding gene. Diseases associated with PCBP3 include Dementia. Gene Ontology (GO) annotations related to this gene include nucleic acid binding and RNA binding. An important paralog of this gene is PCBP2.	Single-stranded nucleic acid binding protein that binds preferentially to oligo dC. ( PCBP3_HUMAN,P57721 )	NP_001335171.1	6e+142	PCBP3
													1.90745e-08	-31.434	138731908
													0.000721996	-25.036	138731926
													1.78806e-07	-32.6159	138731941
													1.34235e-06	-30.7661	138731942
													7.09215e-08	-32.7507	138731947
													3.38809e-07	-30.77	138731948
													2.6268e-06	-29.3606	138731956
													1.3901e-06	-29.3673	138731957
													1.02964e-06	-30.4226	138731962
													1.88588e-10	-35.6964	138731963
													6.90538e-06	-27.5251	138731965
													1.15254e-08	-32.1711	138731966
													3.24403e-07	-30.7274	138731970
													1.64056e-09	-33.9095	138731971
													2.13487e-06	-28.9443	138731977
													1.33645e-07	-30.4969	138731978
													1.03245e-08	-34.1861	138732002
													9.07029e-05	-25.1084	138732003
													7.20847e-10	-36.0147	138732004
													1.81324e-09	-36.4631	138732009
													1.78886e-06	-28.0592	138732011
													3.99991e-07	-30.3547	138732012
													3.31407e-05	-26.6295	138732015
													7.11715e-10	-37.0379	138732016
													1.12278e-07	-31.463	138732025
													7.42843e-09	-35.5041	138732026
													6.0526e-11	-41.7813	138732030
7	NW_024609835.1	149721746	149757049	plus	LOC8025769	8025769	protein-coding	XM_029991971.3	XP_029847831.2		LOW QUALITY PROTEIN: abl interactor 1	580	2.2701e-09	-26.9777	149738465	10	Chain F, Abl interactor 2 [Homo sapiens]	n/a	n/a	n/a	NP_001335171.1	3e-70	no gene
													1.74505e-08	-25.5263	149738482
													6.01942e-09	-25.9078	149738529
													1.05667e-08	-26.0008	149738533
													1.16179e-08	-26.185	149738554
													2.04566e-09	-27.183	149738563
													1.25192e-08	-26.1116	149738569
													8.17432e-08	-26.2921	149738572
													3.89994e-08	-27.5505	149738580
													6.86814e-07	-26.1347	149738583
8	NW_024609835.1	151307922	151990717	minus	LOC8030101	8030101	protein-coding	XM_029991995.2	XP_029847855.2	B7PK10	hemicentin-2 isoform X2	664	0.000828245	-25.4729	151558418	2	neural cell adhesion molecule 2 isoform X7 [Homo sapiens]	n/a	n/a	n/a	XP_024307849.1	5e-18	no gene
													0.000256487	-27.2033	151558425
9	NW_024609835.1	216289004	216328082	minus	LOC120838741	120838741	protein-coding	XM_042294059.1	XP_042149993.1		uncharacterized protein LOC120838741	939	0.000170538	-26.2876	216326207	4	putative nuclease HARBI1 [Homo sapiens]	Predicted to enable metal ion binding activity and nuclease activity. Predicted to be involved in nucleic acid phosphodiester bond hydrolysis. Located in centriolar satellite; cytosol; and plasma membrane. [provided by Alliance of Genome Resources, Apr 2022]	HARBI1 (Harbinger Transposase Derived 1) is a Protein Coding gene. Diseases associated with HARBI1 include Immunodeficiency 63 With Lymphoproliferation And Autoimmunity and Developmental Dysplasia Of The Hip 1. Gene Ontology (GO) annotations related to this gene include hydrolase activity, acting on ester bonds and nuclease activity.	Transposase-derived protein that may have nuclease activity (Potential). Does not have transposase activity. ( HARB1_HUMAN,Q96MB7 )	NP_776172.1	0.0001	HARBI1
													1.33602e-05	-30.1173	216326266
													2.27227e-05	-28.5593	216326268
													9.17641e-05	-26.7084	216326282
10	NW_024609835.1	221212368	221299805	plus	LOC121836118	121836118	protein-coding	XM_042290863.1	XP_042146797.1		protein FMC1 homolog	110	0.00034985	-25.3892	221218852	1	Chromosome 7 open reading frame 55 [Homo sapiens]	n/a	n/a	n/a	AAH08467.1	1e-28	no gene
11	NW_024609835.1	247156515	247443476	minus	LOC8025626	8025626	protein-coding	XM_029971324.3	XP_029827184.2	B7P761	sortilin-related receptor	2129	5.72285e-05	-29.955	247304332	3	sortilin-related receptor preproprotein [Homo sapiens]	This gene encodes a mosaic protein that belongs to at least two families: the vacuolar protein sorting 10 (VPS10) domain-containing receptor family, and the low density lipoprotein receptor (LDLR) family. The encoded protein also contains fibronectin type III repeats and an epidermal growth factor repeat. The encoded preproprotein is proteolytically processed to generate the mature receptor, whic…	SORL1 (Sortilin Related Receptor 1) is a Protein Coding gene. Diseases associated with SORL1 include Complex Hereditary Spastic Paraplegia and Early-Onset Autosomal Dominant Alzheimer Disease. Among its related pathways are Metabolism of proteins and RNA Polymerase I Promoter Opening. Gene Ontology (GO) annotations related to this gene include transmembrane signaling receptor activity and low-den…	Sorting receptor that directs several proteins to their correct location within the cell (Probable). Along with AP-1 complex, involved Golgi apparatus - endosome sorting (PubMed:17646382). Sorting receptor for APP, regulating its intracellular trafficking and processing into amyloidogenic-beta peptides. Retains APP in the trans-Golgi network, hence preventing its transit through late endosomes wh…	NP_003096.2	0	SORL1
													0.000532777	-31.9153	247359940
													0.00592715	-27.1382	247359946
12	NW_024609835.1	249342170	249458254	plus	LOC8039909	8039909	protein-coding	XM_029980379.4	XP_029836239.2		protein LMBR1L isoform X1	480	5.80929e-06	-30.4723	249450639	16	protein LMBR1L isoform 1 [Homo sapiens]	n/a	n/a	n/a	NP_060583.2	2e-149	no gene
													1.03553e-06	-31.8468	249450646
													3.41698e-07	-31.8986	249450650
													3.89496e-08	-35.0558	249450664
													4.03879e-08	-34.8935	249450672
													1.13671e-08	-36.1607	249450675
													3.73807e-10	-39.0441	249450683
													6.03103e-10	-38.3214	249450688
													2.87399e-10	-38.2202	249450691
													1.02872e-09	-37.75	249450696
													1.08314e-10	-38.9906	249450730
													4.10319e-10	-38.5014	249450733
													2.45676e-10	-38.7097	249450738
													4.59974e-11	-41.158	249450740
													1.48602e-10	-39.8536	249450745
													4.16134e-11	-41.6355	249450747
13	NW_024609836.1	3615719	3653006	plus	LOC8040158	8040158	protein-coding	XM_002413988.4	XP_002414033.1	B7P5C4	eukaryotic initiation factor 4A-III	402	1.68e-13	-58.0721	3631966	1	eukaryotic initiation factor 4A-III isoform 1 [Homo sapiens]	This gene encodes a member of the DEAD box protein family. DEAD box proteins, characterized by the conserved motif Asp-Glu-Ala-Asp (DEAD), are putative RNA helicases. They are implicated in a number of cellular processes involving alteration of RNA secondary structure, such as translation initiation, nuclear and mitochondrial splicing, and ribosome and spliceosome assembly. Based on their distrib…	EIF4A3 (Eukaryotic Translation Initiation Factor 4A3) is a Protein Coding gene. Diseases associated with EIF4A3 include Robin Sequence With Cleft Mandible And Limb Anomalies and Cortical Dysplasia, Complex, With Other Brain Malformations 13. Among its related pathways are Nervous system development and Processing of Capped Intron-Containing Pre-mRNA. Gene Ontology (GO) annotations related to this…	ATP-dependent RNA helicase (PubMed:16170325). Involved in pre-mRNA splicing as component of the spliceosome (PubMed:11991638, 22961380, 28076346, 28502770, 29301961). Core component of the splicing-dependent multiprotein exon junction complex (EJC) deposited at splice junctions on mRNAs (PubMed:16170325, 16209946, 16314458, 16923391, 16931718, 19033377, 20479275). The EJC is a dynamic structure c…	NP_055555.1	0	EIF4A3
14	NW_024609836.1	9707247	9811646	plus	LOC8023850	8023850	protein-coding	XM_040205442.3	XP_040061376.2		uncharacterized protein LOC8023850 isoform X1	1115	2.34981e-09	-40.5291	9733855	12	unnamed protein product [Homo sapiens]	SAMD3 (Sterile Alpha Motif Domain Containing 3) is a Protein Coding gene. Diseases associated with SAMD3 include Diaphyseal Medullary Stenosis With Malignant Fibrous Histiocytoma and Baraitser-Winter Syndrome 1. An important paralog of this gene is CNKSR2.	HGNC (21574) NCBI Gene (154075) Ensembl (ENSG00000164483) OMIM® (620516) UniProtKB/Swiss-Prot (Q8N6K7) Open Targets Platform(ENSG00000164483)	not provided	BAC03765.1	2e-17	SAMD3
													1.0278e-10	-42.5234	9733875
													4.76411e-10	-42.6122	9733880
													6.07922e-11	-43.2862	9733884
													1.54704e-10	-42.8493	9733886
													8.00811e-11	-43.5755	9733888
													1.75138e-13	-48.0034	9733890
													2.55255e-12	-45.1579	9733911
													2.63738e-10	-41.6667	9733913
													5.47058e-13	-47.3621	9733926
													2.19027e-12	-45.1314	9733931
													4.0606e-11	-43.6992	9733937
15	NW_024609836.1	10038180	10090479	minus	LOC8041835	8041835	protein-coding	XM_029981859.3	XP_029837719.3	B7QIP9	PMS1 protein homolog 1	828	0.00010321	-33.2375	10074886	1	PMS1 protein [Homo sapiens]	This gene encodes a protein belonging to the DNA mismatch repair mutL/hexB family. This protein is thought to be involved in the repair of DNA mismatches, and it can form heterodimers with MLH1, a known DNA mismatch repair protein. Mutations in this gene cause hereditary nonpolyposis colorectal cancer type 3 (HNPCC3) either alone or in combination with mutations in other genes involved in the HNP…	PMS1 (PMS1 Homolog 1, Mismatch Repair System Component) is a Protein Coding gene. Diseases associated with PMS1 include Colorectal Cancer and Lynch Syndrome. Among its related pathways is Base excision repair. Gene Ontology (GO) annotations related to this gene include ATP hydrolysis activity and mismatched DNA binding. An important paralog of this gene is PMS2.	Probably involved in the repair of mismatches in DNA. ( PMS1_HUMAN,P54277 )	AAH96331.1	5e-72	PMS1
16	NW_024609836.1	10091075	10164281	plus	LOC8032453	8032453	protein-coding	XM_040205425.3	XP_040061359.1		nucleoporin NDC1	572	1.04605e-06	-37.8852	10113707	3	unnamed protein product [Homo sapiens]	A structural constituent of nuclear pore. Involved in nuclear pore complex assembly and nuclear pore localization. Located in actin cytoskeleton; nuclear membrane; and plasma membrane. Part of nuclear pore. [provided by Alliance of Genome Resources, Apr 2022]	NDC1 (NDC1 Transmembrane Nucleoporin) is a Protein Coding gene. Diseases associated with NDC1 include Achalasia-Addisonianism-Alacrima Syndrome and Achalasia. Among its related pathways are Transport of the SLBP independent Mature mRNA and HIV Life Cycle. Gene Ontology (GO) annotations related to this gene include structural constituent of nuclear pore.	Component of the nuclear pore complex (NPC), which plays a key role in de novo assembly and insertion of NPC in the nuclear envelope. Required for NPC and nuclear envelope assembly, possibly by forming a link between the nuclear envelope membrane and soluble nucleoporins, thereby anchoring the NPC in the membrane. ( NDC1_HUMAN,Q9BTX1 )	BAC03665.1	4e-41	NDC1
													0.000270701	-36.4583	10116926
													0.000249102	-36.6612	10116931
17	NW_024609836.1	17964340	18151469	plus	LOC8026993	8026993	protein-coding	XM_029966709.4	XP_029822569.1	B7PAH4	serine/threonine-protein kinase MRCK alpha isoform X1	1759	8.52444e-05	-25.5129	18056900	4	CDC42 binding protein kinase alpha [Homo sapiens]	n/a	n/a	n/a	KAI2521659.1	0	no gene
													3.80232e-06	-33.8649	18057300
													2.62947e-05	-28.6372	18057307
													6.1957e-06	-33.4872	18057320
18	NW_024609836.1	37843829	38133539	plus	LOC8033856	8033856	protein-coding	XM_042287882.1	XP_042143816.1		uncharacterized protein LOC8033856	641	0.00706967	-25.2525	37888962	4	no significant similarity found	n/a	n/a	n/a	n/a	n/a	n/a
													0.0012541	-29.1041	37888973
													0.0070801	-25.7279	37888985
													0.00647638	-25.8145	37908539
19	NW_024609836.1	39217259	39306536	plus	LOC8029309	8029309	protein-coding	XM_040213614.2	XP_040069548.1	B7QEL2	hydroxyacid oxidase 1	327	0.00489171	-26.631	39298925	1	Chain A, Hydroxyacid oxidase 1 [Homo sapiens]	n/a	n/a	n/a	6GMB_A	8e-111	no gene
20	NW_024609836.1	68310007	68311259	plus	LOC115316486	115316486	protein-coding	XM_040205736.3	XP_040061670.1		uncharacterized protein LOC115316486	235	0.000342469	-30.4144	68310865	3	no significant similarity found	n/a	n/a	n/a	n/a	n/a	n/a
													0.00203045	-26.57	68310868
													0.00474005	-25.5018	68310880
21	NW_024609836.1	80413008	80414741	minus	LOC115312896	115312896	protein-coding	XM_029971840.2	XP_029827700.2		piggyBac transposable element-derived protein 4-like	577	8.82946e-05	-31.9022	80414213	7	piggyBac transposable element-derived protein 4 [Homo sapiens]	The piggyBac family of proteins, found in diverse animals, are transposases related to the transposase of the canonical piggyBac transposon from the moth, Trichoplusia ni. This family also includes genes in several genomes, including human, that appear to have been derived from the piggyBac transposons. This gene belongs to the subfamily of piggyBac transposable element derived (PGBD) genes. The …	PGBD4 (PiggyBac Transposable Element Derived 4) is a Protein Coding gene. Diseases associated with PGBD4 include Neurodevelopmental Disorder With Eye Movement Abnormalities And Ataxia and Cockayne Syndrome B.	HGNC (19401) NCBI Gene (161779) Ensembl (ENSG00000182405) UniProtKB/Swiss-Prot (Q96DM1)	NP_689808.2	9e-158	PGBD4
													3.37768e-06	-34.7441	80414232
													2.43215e-06	-38.4576	80414274
													3.95864e-07	-41.8306	80414299
													4.51589e-05	-35.8146	80414305
													2.33926e-05	-37.4753	80414314
													9.79257e-05	-35.3995	80414324
22	NW_024609836.1	83936064	83979323	plus	LOC8023687	8023687	protein-coding	XM_040207683.2	XP_040063617.2	B7P2J3	genetic suppressor element 1	1499	0.00165476	-30	83970859	1	genetic suppressor element 1 isoform X1 [Homo sapiens]	This gene encodes a proline-rich protein with coiled coil domains that may be a subunit of a BRAF35-HDAC (BHC) histone deacetylase complex. This gene may function as an oncogene in breast cancer and enhanced expression of the encoded protein has been observed in breast cancer patients. [provided by RefSeq, May 2017]	GSE1 (Gse1 Coiled-Coil Protein) is a Protein Coding gene. Diseases associated with GSE1 include Intraventricular Meningioma and Myoclonic Cerebellar Dyssynergia.	wasn't there	XP_054235849.1	2e-25	GSE1
23	NW_024609837.1	14509876	14611880	minus	LOC115330989	115330989	protein-coding	XM_040223152.3	XP_040079086.2	B7QGB5	ADAMTS-like protein 4	737	1.64e-07	-41.8701	14512227	1	ADAMTSL4 protein [Homo sapiens]	This gene is a member of ADAMTS (a disintegrin and metalloproteinase with thrombospondin motifs)-like gene family and encodes a protein with seven thrombospondin type 1 repeats. The thrombospondin type 1 repeat domain is found in many proteins with diverse biological functions including cellular adhesion, angiogenesis, and patterning of the developing nervous system. Alternate transcriptional spl…	ADAMTSL4 (ADAMTS Like 4) is a Protein Coding gene. Diseases associated with ADAMTSL4 include Ectopia Lentis Et Pupillae and Ectopia Lentis 2, Isolated, Autosomal Recessive. Among its related pathways are O-linked glycosylation of mucins and Metabolism of proteins. Gene Ontology (GO) annotations related to this gene include peptidase activity and protease binding. An important paralog of this gene…	Positive regulation of apoptosis. May facilitate FBN1 microfibril biogenesis. ( ATL4_HUMAN,Q6UY14 )	AAI44582.1	2e-103	ADAMTSL4
24	NW_024609837.1	34970661	35016776	plus	LOC8036613	8036613	protein-coding	XM_040217678.3	XP_040073612.1	B7Q6H1	protein madd-4	1070	1.663e-09	-43.007	34999945	12	ADAMTS-like protein 1 isoform X11 [Homo sapiens]	This gene encodes a secreted protein and member of the ADAMTS (a disintegrin and metalloproteinase with thrombospondin motif) family. This protein lacks the metalloproteinase and disintegrin-like domains, which are typical of the ADAMTS family, but contains other ADAMTS domains, including the thrombospondin type 1 motif. This protein may have important functions in the extracellular matrix. Alter…	ADAMTSL1 (ADAMTS Like 1) is a Protein Coding gene. Diseases associated with ADAMTSL1 include Microcephaly-Facial Dysmorphism-Ocular Anomalies-Multiple Congenital Anomalies Syndrome and Quebec Platelet Disorder. Among its related pathways are O-linked glycosylation of mucins and Metabolism of proteins. Gene Ontology (GO) annotations related to this gene include peptidase activity and metallopeptid…	wasn't there	XP_047280033	2e-76	ADAMTSL1
													3.93644e-09	-41.1379	34999977
													3.38826e-08	-39.5444	34999986
													5.17163e-11	-44.8703	35000006
													1.95114e-09	-40.1795	35000014
													1.45837e-08	-39.8198	35000022
													3.06892e-07	-37.2678	35000033
													1.43828e-09	-41.9394	35000036
													9.61762e-11	-43.7186	35000045
													1.24036e-10	-43.9828	35000062
													4.14476e-08	-40.2864	35000065
													2.97208e-06	-39.5328	35000068
25	NW_024609837.1	35028177	35078487	minus	LOC8036612	8036612	protein-coding	XM_029973219.3	XP_029829079.2	B7Q6H2	basic proline-rich protein isoform X1	1129	4.22706e-33	-69.5301	35035952	16	zinc finger protein 608 isoform 3 [Homo sapiens]	Predicted to enable metal ion binding activity. Predicted to be involved in negative regulation of transcription by RNA polymerase II. Predicted to be active in nucleus. [provided by Alliance of Genome Resources, Apr 2022]	ZNF608 (Zinc Finger Protein 608) is a Protein Coding gene. Diseases associated with ZNF608 include Contractural Arachnodactyly, Congenital. An important paralog of this gene is ZNF609.	Transcription factor, which represses ZNF609 transcription. ( ZN608_HUMAN,Q9ULD9 )	NP_001372550.1	2e-56	ZNF608
													7.43512e-38	-70.1998	35035985
													8.97911e-40	-72.6454	35035987
													4.83516e-40	-73.1911	35036000
													1.48348e-45	-76.6518	35036009
													8.93505e-37	-70.8733	35036021
													5.52862e-43	-74.7071	35036024
													8.29596e-46	-78.4904	35036031
													1.0295e-47	-78.822	35036034
													8.97911e-40	-73.1316	35036038
													9.99556e-44	-76.7436	35036042
													8.26413e-40	-74.0365	35036051
													1.07099e-39	-75.4744	35036059
													2.49603e-35	-76.2537	35036081
													1.60669e-32	-74.4179	35036084
													0.0044537	-29.0429	35051669
26	NW_024609838.1	5820	168173	minus	LOC121835319	121835319	protein-coding	XM_042289352.1	XP_042145286.1		uncharacterized protein LOC121835319	554	0.000248611	-30.1027	84320	8	Rep [Homo sapiens]	n/a	n/a	n/a	AMD82217.1	0.04	no gene
													1.10146e-06	-36.7857	84364
													0.000280811	-27.7473	84369
													0.00225872	-28.9377	90898
													0.000239116	-33.3089	90906
													0.00227976	-27.61	90908
													0.000282422	-32.4561	90911
													0.000347567	-31.4662	90918
27	NW_024609838.1	12479189	12550337	minus	LOC8034193	8034193	protein-coding	XM_040211572.3	XP_040067506.1		ubiquitin carboxyl-terminal hydrolase 24	2549	1.05351e-05	-37.5819	12542048	16	ubiquitin carboxyl-terminal hydrolase 24 [Homo sapiens]	n/a	n/a	n/a	NP_056121.2	0	no gene
													1.12051e-06	-39.9628	12542060
													8.72574e-10	-47.4541	12542063
													0.000222166	-31.5152	12542065
													1.31224e-05	-35.3351	12542070
													8.88797e-06	-36.2896	12542073
													6.36604e-06	-36.811	12542079
													8.17988e-08	-41.7647	12542117
													3.49156e-08	-42.915	12542120
													0.00346546	-25.9345	12542130
													2.65148e-10	-48.129	12542133
													2.16251e-07	-41.7965	12542135
													3.01935e-07	-41.1696	12542140
													4.90244e-11	-52.4762	12542143
													0.00220589	-30.8286	17675599
													0.00352524	-30.2139	17675601
28	NW_024609838.1	21025442	21051791	plus	LOC8043542	8043542	protein-coding	XM_029985544.4	XP_029841404.1	B7QMM8	ribonucleoprotein PTB-binding 1 isoform X2	614	1.24289e-05	-33.373	21042147	4	ribonucleoprotein PTB-binding 1 isoform X2 [Homo sapiens]	Enables RNA binding activity. Predicted to be involved in regulation of alternative mRNA splicing, via spliceosome. Predicted to be located in cytoplasm. Predicted to be active in nucleus. [provided by Alliance of Genome Resources, Apr 2022]	RAVER1 (Ribonucleoprotein, PTB Binding 1) is a Protein Coding gene. Gene Ontology (GO) annotations related to this gene include nucleic acid binding and nucleotide binding. An important paralog of this gene is RAVER2.	Cooperates with PTBP1 to modulate regulated alternative splicing events. Promotes exon skipping. Cooperates with PTBP1 to modulate switching between mutually exclusive exons during maturation of the TPM1 pre-mRNA (By similarity). ( RAVR1_HUMAN,Q8IY67 )	XP_047294098.1	6e-30	RAVER1
													0.000292874	-25.7353	21042157
													0.000692019	-26.1719	21042162
													4.39283e-06	-30.8594	21042165
29	NW_024609838.1	23066456	23124749	plus	LOC8051108	8051108	protein-coding	XM_029992070.3	XP_029847930.2	B7PEH9	epidermal growth factor receptor kinase substrate 8-like protein 1 isoform X1	947	2.78529e-06	-36.9674	23100886	13	unnamed protein product [Homo sapiens]	This gene encodes a member of the EPS8 family. This protein contains one PH domain and one SH3 domain. It functions as part of the EGFR pathway, though its exact role has not been determined. Highly similar proteins in other organisms are involved in the transduction of signals from Ras to Rac and growth factor-mediated actin remodeling. Alternate transcriptional splice variants of this gene have…	EPS8 (EGFR Pathway Substrate 8, Signaling Adaptor) is a Protein Coding gene. Diseases associated with EPS8 include Deafness, Autosomal Recessive 102 and Rare Autosomal Recessive Non-Syndromic Sensorineural Deafness Type Dfnb. Among its related pathways are Sensory processing of sound and PDGFR-beta signaling pathway. Gene Ontology (GO) annotations related to this gene include actin binding and sm…	Signaling adapter that controls various cellular protrusions by regulating actin cytoskeleton dynamics and architecture. Depending on its association with other signal transducers, can regulate different processes. Together with SOS1 and ABI1, forms a trimeric complex that participates in transduction of signals from Ras to Rac by activating the Rac-specific guanine nucleotide exchange factor (GE…	BAG65598.1	2e-70	EPS8
													2.18081e-10	-44.8601	23100894
													2.73412e-13	-46.4152	23100913
													1.11886e-14	-47.3243	23100916
													2.29347e-15	-48.5954	23100919
													6.11369e-15	-47.7477	23100936
													1.94384e-11	-42.1386	23100945
													9.96326e-11	-41.3176	23100948
													2.25464e-15	-48.7171	23100959
													1.04604e-17	-52.1231	23100967
													4.71087e-13	-45.9502	23100975
													2.74586e-15	-50.0381	23100995
													1.10759e-16	-52.5292	23101004
30	NW_024609838.1	23920854	23929869	minus	LOC8023708	8023708	protein-coding	XM_002402541.4	XP_002402585.3		uncharacterized protein LOC8023708	214	0.0002682	-30.6496	23928215	1	no significant similarity found	n/a	n/a	n/a	n/a	n/a	n/a
31	NW_024609838.1	27899423	27943665	minus	LOC115332130	115332130	protein-coding	XM_029994418.4	XP_029850278.3	B7Q7F2	LOW QUALITY PROTEIN: histone-lysine N-methyltransferase, H3 lysine-79 specific	1630	0.0024261	-25.5686	27928969	1	Chain K, Histone-lysine N-methyltransferase, H3 lysine-79 specific [Homo sapiens]	n/a	n/a	n/a	6NN6_K	6e-170	no gene
32	NW_024609838.1	28687255	28787614	plus	LOC115316623	115316623	protein-coding	XM_040221482.2	XP_040077416.1		proteasome adapter and scaffold protein ECM29	1813	6.15e-06	-28.5634	28751593	1	Ecm29 proteasome adaptor and scaffold [Homo sapiens]	n/a	n/a	n/a	KAI2553537.1	0	no gene
33	NW_024609838.1	83673535	83721520	plus	LOC115319049	115319049	protein-coding	XM_040219328.2	XP_040075262.1	B7Q7J3	uncharacterized protein LOC115319049	394	0.00918417	-25.1052	83692065	1	no significant similarity found	n/a	n/a	n/a	n/a	n/a	n/a
34	NW_024609838.1	88350434	88628887	minus	LOC8025408	8025408	protein-coding	XM_040206824.3	XP_040062758.1		dedicator of cytokinesis protein 7 isoform X1	2078	3.386e-05	-27.549	88494993	25	dedicator of cytokinesis protein 7 isoform 4 [Homo sapiens]	The protein encoded by this gene is a guanine nucleotide exchange factor (GEF) that plays a role in axon formation and neuronal polarization. The encoded protein displays GEF activity toward RAC1 and RAC3 Rho small GTPases but not toward CDC42. Several transcript variants encoding different isoforms have been found for this gene. [provided by RefSeq, Dec 2012]	DOCK7 (Dedicator Of Cytokinesis 7) is a Protein Coding gene. Diseases associated with DOCK7 include Developmental And Epileptic Encephalopathy 23 and Hypobetalipoproteinemia, Familial, 2. Among its related pathways are Signaling by Rho GTPases and MET promotes cell motility. Gene Ontology (GO) annotations related to this gene include binding and small GTPase binding. An important paralog of this …	Functions as a guanine nucleotide exchange factor (GEF), which activates Rac1 and Rac3 Rho small GTPases by exchanging bound GDP for free GTP. Does not have a GEF activity for CDC42. Required for STMN1 'Ser-15' phosphorylation during axon formation and consequently for neuronal polarization (PubMed:16982419). As part of the DISP complex, may regulate the association of septins with actin and ther…	NP_001258930.1	0	DOCK7
													9.66823e-07	-30.4789	88494999
													8.47497e-06	-28.2051	88495024
													1.46561e-06	-27.9359	88495030
													1.20168e-05	-27.9685	88495051
													0.00100989	-28.7049	88495107
													1.20811e-11	-40.4234	88588041
													6.12338e-12	-41.7025	88588043
													1.17838e-16	-49.359	88588049
													3.81775e-16	-47.9938	88588052
													3.06579e-17	-47.8241	88588061
													2.57227e-16	-45.2471	88588065
													2.1014e-17	-46.7832	88588068
													1.15537e-13	-40.7355	88588072
													2.72983e-11	-42.3763	88588097
													1.77992e-09	-39.9707	88588101
													2.9222e-11	-43.6436	88588103
													3.09644e-08	-39.8094	88588109
													1.26637e-06	-34.0229	88588112
													2.05553e-05	-35.307	88588126
													1.64362e-06	-36.2265	88588161
													0.00027882	-32.7381	88588173
													5.70493e-05	-37.1837	88588177
													0.000223311	-35.5664	88588182
													1.01011e-05	-42.3611	88588186
35	NW_024609838.1	88944693	89210437	minus	LOC8037389	8037389	protein-coding	XM_040212128.3	XP_040068062.1	B7QFA8	kinesin-like protein KIF21A isoform X1	1544	1.12704e-09	-47.1536	88980092	21	kinesin-like protein KIF21A isoform 3 [Homo sapiens]	This gene encodes a member of the KIF4 subfamily of kinesin-like motor proteins. The encoded protein is characterized by an N-terminal motor domain a coiled-coil stalk domain and a C-terminal WD-40 repeat domain. This protein may be involved in microtubule dependent transport. Mutations in this gene are the cause of congenital fibrosis of extraocular muscles-1. Alternate splicing results in multi…	KIF21A (Kinesin Family Member 21A) is a Protein Coding gene. Diseases associated with KIF21A include Fibrosis Of Extraocular Muscles, Congenital, 1 and Congenital Fibrosis Of The Extraocular Muscles. Among its related pathways are Golgi-to-ER retrograde transport and Vesicle-mediated transport. Gene Ontology (GO) annotations related to this gene include binding and microtubule binding. An importa…	Microtubule-binding motor protein probably involved in neuronal axonal transport. In vitro, has a plus-end directed motor activity. ( KI21A_HUMAN,Q7Z4S6 )	NP_001166934.1	0	KIF21A
													5.02056e-05	-33.4361	88980113
													1.99836e-05	-34.8837	88980122
													4.10793e-05	-32.8161	88980126
													6.27248e-05	-32.4885	88980128
													0.000110394	-30.9908	88980142
													1.11217e-06	-35.8526	88980163
													4.16234e-07	-37.4641	88980165
													2.01674e-07	-38.5343	88980170
													1.04442e-07	-39.121	88980173
													2.08736e-05	-33.0569	88980177
													3.41708e-06	-35.6336	88980187
													4.66229e-08	-42.3977	88980200
													4.43484e-05	-34.7579	88980218
													9.27155e-06	-36.1092	88980220
													1.9506e-05	-36.2953	88980222
													0.000263092	-38.215	88980242
													9.75944e-08	-48.1574	88980258
													0.00184521	-25.3187	89189311
													0.0010808	-26.3248	89189319
													0.000776276	-27.1409	89189340
36	NW_024609839.1	627927	653554	minus	LOC115331126	115331126	protein-coding	XM_040501737.2	XP_040357671.1		protein YIPF3-like	81	0.000256988	-31.4046	629789	27	natural killer cell-specific antigen KLIP1 [Homo sapiens]	Predicted to be involved in cell differentiation. Located in Golgi apparatus and transport vesicle. [provided by Alliance of Genome Resources, Apr 2022]	YIPF3 (Yip1 Domain Family Member 3) is a Protein Coding gene. Diseases associated with YIPF3 include Leukodystrophy and Spondylometaphyseal Dysplasia, Kozlowski Type. An important paralog of this gene is DTWD1.	Involved in the maintenance of the Golgi structure. May play a role in hematopoiesis. ( YIPF3_HUMAN,Q9GZM5 )	AAM21161.1	1e-05	YIPF3
													2.6422e-06	-37.437	629794
													0.000439076	-27.6618	629812
													0.000219405	-28.414	629835
													0.000690146	-25.2445	629836
													0.000161205	-28.3261	629851
													3.96072e-06	-29.7504	629852
													5.59113e-05	-29.0143	629861
													7.47089e-06	-27.8378	629862
													0.000205054	-27.2575	629864
													4.46173e-06	-28.3979	629865
													1.42006e-05	-29.5282	629883
													1.0581e-06	-28.5393	629884
													2.04397e-06	-31.0498	629893
													2.32817e-06	-27.5341	629894
													5.38893e-06	-28.6149	629904
													7.49611e-06	-28.2333	629910
													1.32578e-05	-26.4672	629923
													4.1578e-05	-25.1449	629925
													3.10303e-05	-28.5854	630038
													0.000103118	-26.6868	630041
													8.73898e-05	-27.972	630057
													0.000127544	-26.5196	630074
													2.34374e-06	-30.511	630085
													0.00490759	-26.0577	649558
													0.000132479	-25.3845	649609
													7.37493e-06	-26.2407	649648
37	NW_024609839.1	967917	1135514	minus	LOC8039200	8039200	protein-coding	XM_029982218.4	XP_029838078.2		tuberin isoform X1	1713	8.30206e-05	-27.4026	1017034	26	TSC complex subunit 2 [Homo sapiens]	n/a	n/a	n/a	KAI2576477.1	0	no gene
													1.49131e-06	-36.2802	1017041
													2.75325e-07	-31.4745	1017044
													7.97962e-06	-30.0376	1017048
													2.67622e-14	-54.5828	1049498
													7.75686e-16	-60.9855	1049500
													4.14713e-09	-42.3185	1075477
													9.47453e-06	-37.493	1075486
													1.9841e-05	-32.8323	1075512
													0.00015899	-30.9845	1075515
													5.41377e-07	-36.6593	1075545
													0.000509893	-31.0027	1075555
													7.8271e-05	-31.6667	1075558
													5.09924e-07	-31.7921	1115796
													5.47993e-08	-32.8462	1115814
													0.000272871	-27.3333	1115817
													3.07995e-05	-26.2821	1115825
													9.26881e-08	-32.3387	1115828
													2.47844e-07	-28.8255	1115832
													9.07807e-19	-55.2158	1115835
													5.24221e-07	-29.7785	1115842
													0.000242031	-25.4081	1115851
													1.19446e-07	-31.1915	1115858
													2.04628e-08	-30.1887	1115862
													1.80202e-10	-35.2471	1115877
													1.28999e-20	-61.6734	1115884
38	NW_024609839.1	1457844	1527499	plus	LOC115318171	115318171	protein-coding	XM_040217306.3	XP_040073240.2		kinetochore protein NDC80 homolog isoform X1	565	4.53553e-06	-31.9355	1473566	66	NDC80 protein [Homo sapiens]	This gene encodes a component of the NDC80 kinetochore complex. The encoded protein consists of an N-terminal microtubule binding domain and a C-terminal coiled-coiled domain that interacts with other components of the complex. This protein functions to organize and stabilize microtubule-kinetochore interactions and is required for proper chromosome segregation. [provided by RefSeq, Oct 2011]	NDC80 (NDC80 Kinetochore Complex Component) is a Protein Coding gene. Diseases associated with NDC80 include Endometrial Adenosquamous Carcinoma and Endometrial Adenocarcinoma. Among its related pathways are EML4 and NUDC in mitotic spindle formation and Separation of Sister Chromatids. Gene Ontology (GO) annotations related to this gene include identical protein binding and structural constituen…	Acts as a component of the essential kinetochore-associated NDC80 complex, which is required for chromosome segregation and spindle checkpoint activity (PubMed:12351790, 14654001, 14699129, 15062103, 15235793, 15239953, 15548592, 16732327, 30409912, 9315664). Required for kinetochore integrity and the organization of stable microtubule binding sites in the outer plate of the kinetochore (PubMed:1…	AAH05239.1	2e-20	NDC80
													8.10059e-07	-36.4899	1473570
													2.42663e-05	-29.5516	1473571
													3.27536e-06	-33.7411	1473580
													8.0137e-07	-33.1233	1473581
													3.77846e-08	-36.7909	1473603
													3.0853e-07	-33.2185	1473604
													2.88877e-07	-34.2986	1473608
													4.05887e-07	-32.2613	1473609
													6.47686e-05	-26.6073	1473612
													4.32716e-08	-35.658	1473617
													2.64467e-07	-32.3462	1473618
													4.91852e-09	-37.832	1473648
													3.9473e-09	-36.6917	1473649
													3.32517e-07	-33.1968	1473656
													2.05261e-08	-34.6162	1473657
													1.08237e-07	-34.2411	1473672
													1.42174e-07	-34.5474	1473673
													5.80991e-08	-34.6154	1473674
													1.02057e-05	-29.6642	1473675
													0.000334007	-27.2813	1474977
													0.000162224	-28.287	1474984
													8.34515e-05	-28.2749	1475027
													0.000104521	-30.7682	1475109
													7.80749e-06	-35.4113	1475121
													1.84884e-05	-33.9331	1475124
													0.000166777	-36.7089	1492066
													0.00023228	-36.2545	1492068
													0.000169841	-37.1053	1492076
													0.000710785	-29.5123	1492300
													0.0021362	-25.4978	1494270
													0.00455098	-26.3764	2506241
													0.00390416	-25.7923	2506262
													0.00538908	-27.105	2517294
													0.000149376	-38.4111	2517340
													2.88648e-05	-30.9323	2529812
													5.25154e-05	-29.7707	2529839
													0.000109564	-30.1084	2529858
													0.000870884	-27.2727	2529866
													0.000236925	-29.9457	2539992
													8.4928e-09	-42.1263	2540008
													1.65474e-06	-35.7393	2540018
													8.2361e-08	-39.1587	2540035
													5.2077e-05	-31.0922	2540039
													1.09835e-05	-32.9053	2540041
													2.47844e-07	-37.7911	2540043
													2.82453e-06	-35	2540046
													2.73376e-07	-37.9005	2540049
													3.63032e-07	-37.7828	2540053
													1.51368e-08	-41.1583	2540055
													0.00013738	-31.1233	2540072
													0.000173228	-33.445	2540107
													2.81465e-05	-35.7964	2545518
													4.83786e-07	-41.6066	2545522
													5.25272e-07	-40.5193	2545524
													8.21917e-06	-36.4161	2545527
													1.05105e-06	-38.5526	2545531
													8.91538e-08	-35.9258	2545566
													2.75328e-09	-38.2937	2545573
													2.03559e-09	-37.5032	2545586
													8.59675e-09	-36.1536	2545589
													7.6772e-09	-35.8333	2545603
													2.06602e-08	-34.8042	2545611
													1.12337e-09	-38.2195	2545652
													4.93983e-06	-36.2174	2545685
39	NW_024609839.1	11265474	11417022	plus	LOC8024278	8024278	protein-coding	XM_042289813.1	XP_042145747.1	B7P403	teneurin-m	2999	0.000346362	-32.1429	11387271	20	teneurin-2 isoform X3 [Homo sapiens]	Enables cell adhesion molecule binding activity and signaling receptor binding activity. Involved in several processes, including calcium-mediated signaling using intracellular calcium source; heterophilic cell-cell adhesion via plasma membrane cell adhesion molecules; and retrograde trans-synaptic signaling by trans-synaptic protein complex. Located in cell-cell junction and plasma membrane. [pr…	TENM2 (Teneurin Transmembrane Protein 2) is a Protein Coding gene. Diseases associated with TENM2 include Deafness, Nonsyndromic Sensorineural, Mitochondrial and Peeling Skin Syndrome 4. Gene Ontology (GO) annotations related to this gene include calcium ion binding and protein heterodimerization activity. An important paralog of this gene is TENM3.	Involved in neural development, regulating the establishment of proper connectivity within the nervous system. Promotes the formation of filopodia and enlarged growth cone in neuronal cells. Induces homophilic cell-cell adhesion (By similarity). May function as a cellular signal transducer. ( TEN2_HUMAN,Q9NT68 ) [Isoform 2]: Acts as a ligand of the ADGRL1 receptor. Mediates axon guidance and hete…	XP_047273374.1	0	TENM2
													0.00368787	-27.0147	11387291
													0.000851678	-25.1724	11404163
													2.30038e-05	-30.3814	11404172
													4.53938e-05	-29.5106	11404174
													4.86194e-05	-29.4965	11404176
													7.92037e-05	-35.8	11404235
													2.47264e-07	-42.9446	11415627
													5.84314e-09	-40.989	11415653
													1.79108e-08	-42.3733	11415655
													9.59617e-08	-40.4719	11415660
													7.01146e-07	-37.7377	11415664
													8.14721e-07	-36.501	11415670
													9.97114e-06	-33.0928	11415691
													2.47504e-06	-35.3646	11415699
													1.93829e-05	-33.036	11415706
													3.7041e-05	-32.3589	11415712
													3.87775e-05	-33.196	11415719
													6.69318e-06	-35.8097	11415724
													0.000553429	-29.2376	11415727
40	NW_024609839.1	11875280	12094440	plus	LOC8024807	8024807	protein-coding	XM_040214461.3	XP_040070395.2		E3 ubiquitin-protein ligase HERC2 isoform X3	4996	9.74537e-13	-50.1603	12051793	10	HERC2 [Homo sapiens]	This gene belongs to the HERC gene family that encodes a group of unusually large proteins, which contain multiple structural domains. All members have at least 1 copy of an N-terminal region showing homology to the cell cycle regulator RCC1 and a C-terminal HECT (homologous to E6-AP C terminus) domain found in a number of E3 ubiquitin protein ligases. Genetic variations in this gene are associat…	HERC2 (HECT And RLD Domain Containing E3 Ubiquitin Protein Ligase 2) is a Protein Coding gene. Diseases associated with HERC2 include Intellectual Developmental Disorder, Autosomal Recessive 38 and Developmental Delay With Autism Spectrum Disorder And Gait Instability. Among its related pathways are HDR through Homologous Recombination (HRR) or Single Strand Annealing (SSA) and Class I MHC mediat…	E3 ubiquitin-protein ligase that regulates ubiquitin-dependent retention of repair proteins on damaged chromosomes. Recruited to sites of DNA damage in response to ionizing radiation (IR) and facilitates the assembly of UBE2N and RNF8 promoting DNA damage-induced formation of 'Lys-63'-linked ubiquitin chains. Acts as a mediator of binding specificity between UBE2N and RNF8. Involved in the mainte…	AAD08657.1	0	HERC2
													2.5786e-13	-51.559	12051796
													2.19233e-12	-47.6052	12051804
													1.94357e-11	-44.7319	12051818
													4.90913e-08	-38.3065	12051823
													1.00296e-06	-35.1645	12051825
													1.13219e-11	-42.9293	12051829
													9.8437e-13	-44.1341	12051839
													3.67039e-06	-32.8001	12051841
													2.89392e-10	-40.6915	12051843
41	NW_024609839.1	12094510	12121825	minus	LOC115308168	115308168	protein-coding	XM_029977144.4	XP_029833004.2	B7P585	probable phosphoglycerate kinase isoform X1	453	0.000246573	-28.3487	12100320	4	Chain A, PHOSPHOGLYCERATE KINASE 1 [Homo sapiens]	n/a	n/a	n/a	2Y3I_A	0	no gene
													0.000158506	-27.1902	12100351
													0.000201797	-25.8212	12100355
													0.00109335	-25.5297	12100409
42	NW_024609839.1	25699801	25806622	plus	LOC8037623	8037623	protein-coding	XM_040207238.3	XP_040063172.3	B7QIZ7	multidrug resistance-associated protein 1	1198	4.14151e-06	-29.8176	25788292	3	multidrug resistance-associated protein 1 isoform X31 [Homo sapiens]	The protein encoded by this gene is a member of the superfamily of ATP-binding cassette (ABC) transporters. ABC proteins transport various molecules across extra-and intra-cellular membranes. ABC genes are divided into seven distinct subfamilies (ABC1, MDR/TAP, MRP, ALD, OABP, GCN20, White). This full transporter is a member of the MRP subfamily which is involved in multi-drug resistance. This pr…	ABCC1 (ATP Binding Cassette Subfamily C Member 1 (ABCC1 Blood Group)) is a Protein Coding gene. Diseases associated with ABCC1 include Deafness, Autosomal Dominant 77 and Rare Autosomal Dominant Non-Syndromic Sensorineural Deafness Type Dfna. Among its related pathways are Nuclear events mediated by NFE2L2 and Fatty acid metabolism. Gene Ontology (GO) annotations related to this gene include tran…	Mediates export of organic anions and drugs from the cytoplasm (PubMed:10064732, 11114332, 16230346, 7961706, 9281595). Mediates ATP-dependent transport of glutathione and glutathione conjugates, leukotriene C4, estradiol-17-beta-o-glucuronide, methotrexate, antiviral drugs and other xenobiotics (PubMed:10064732, 11114332, 16230346, 7961706, 9281595). Confers resistance to anticancer drugs by dec…	XP_054185069	0	ABCC1
													1.54237e-05	-27.4146	25788296
													4.07714e-05	-28.4186	25788300
43	NW_024609839.1	40075715	40076758	minus	LOC120838845	120838845	protein-coding	XM_040208937.1	XP_040064871.1	B7PS27	serine/threonine-protein kinase pim-1-like	268	0.000647017	-27.5264	40075990	55	Chain A, Proto-oncogene serine/threonine-protein kinase Pim-1 [Homo sapiens]	Acts as a positive regulator of mTORC1 signaling by mediating phosphorylation	n/a	n/a	1YHS_A	2e-20	Pim-1
													8.37181e-06	-33.8093	40075994
													7.14194e-05	-31.8207	40075997
													0.000896192	-27.3554	40076005
													4.25637e-05	-30.7902	40076014
													9.2666e-05	-29.7643	40076030
													0.00068248	-25.9266	40076039
													0.000699742	-26.57	40076044
													3.38514e-05	-30.6577	40076046
													5.84585e-06	-32.9257	40076065
													7.48946e-05	-28.8305	40076083
													0.000368348	-27.1362	40076089
													3.72896e-05	-30.7143	40076095
													1.49621e-05	-31.9222	40076098
													3.58919e-05	-30.3258	40076104
													4.31608e-06	-33.8462	40076119
													6.86419e-07	-36.9211	40076122
													5.8737e-06	-28.725	40076197
													1.53614e-05	-28.1375	40076205
													8.66464e-06	-27.9421	40076242
													2.30038e-05	-27.5708	40076245
													2.99133e-05	-26.9687	40076251
													1.84487e-05	-25.4189	40076252
													9.36941e-06	-27.8636	40076256
													9.65256e-08	-32.9524	40076266
													8.47442e-06	-26.864	40076267
													9.28133e-07	-30.3462	40076272
													7.93305e-05	-25.8592	40076284
													2.66231e-07	-32.0311	40076286
													5.74532e-06	-30.4487	40076290
													1.51485e-07	-33.263	40076291
													0.00014525	-25.4902	40076306
													6.30808e-06	-34.6985	40076369
													1.18915e-05	-34.3716	40076371
													0.00171747	-26.9063	40076379
													0.00240605	-26.9291	40076400
													1.95912e-06	-38.6055	40076405
													4.57423e-06	-39.0175	40076420
													3.27072e-06	-38.9053	40076424
													1.31297e-05	-38.3576	40076443
													2.81759e-05	-36.8485	40076450
													6.73686e-05	-35.4159	40076453
													0.00010777	-36.8213	40076470
													1.13738e-05	-35.049	40076585
													2.99802e-05	-33.3777	40076591
													1.66243e-06	-36.063	40076615
													4.71019e-06	-34.7803	40076618
													6.55801e-07	-37.2421	40076629
													4.43759e-08	-40.5637	40076642
													5.30387e-08	-40.2258	40076655
													2.00651e-06	-36.5306	40076674
													0.00045498	-28.9985	40076678
													9.07801e-07	-37.7179	40076681
													4.52123e-06	-35.7743	40076688
													1.17487e-05	-34.4103	40076696
44	NW_024609839.1	47897452	47932282	plus	LOC8023978	8023978	protein-coding	XM_029988596.4	XP_029844456.3		ankyrin repeat and LEM domain-containing protein 2	948	2.1446e-05	-33.2409	47904229	2	ANKLE2 protein [Homo sapiens]	This gene encodes a member of the LEM family of inner nuclear membrane proteins. The encoded protein functions as a mitotic regulator through postmitotic formation of the nuclear envelope. Mutations in this gene cause morphology defects in the nuclear envelope and BAF hyperphosphorylation. [provided by RefSeq, Mar 2014]	ANKLE2 (Ankyrin Repeat And LEM Domain Containing 2) is a Protein Coding gene. Diseases associated with ANKLE2 include Microcephaly 16, Primary, Autosomal Recessive and Leukoencephalopathy With Vanishing White Matter. Among its related pathways are Cell Cycle, Mitotic and Signaling by Rho GTPases. Gene Ontology (GO) annotations related to this gene include protein phosphatase regulator activity an…	Involved in mitotic nuclear envelope reassembly by promoting dephosphorylation of BAF/BANF1 during mitotic exit (PubMed:22770216). Coordinates the control of BAF/BANF1 dephosphorylation by inhibiting VRK1 kinase and promoting dephosphorylation of BAF/BANF1 by protein phosphatase 2A (PP2A), thereby facilitating nuclear envelope assembly (PubMed:22770216). May regulate nuclear localization of VRK1 …	AAH01530.2	1e-77	ANKLE2
													8.33945e-05	-25.5078	47904262
45	NW_024609839.1	57439694	57505558	minus	LOC120848855	120848855	protein-coding	XM_042289912.1	XP_042145846.1	B7P403	LOW QUALITY PROTEIN: teneurin-m-like	2516	0.000238751	-25.234	57440166	155	teneurin-3 isoform 5 [Homo sapiens]	This gene encodes a member of the teneurin transmembrane protein family. The encoded protein may be involved in the regulation of neuronal development including development of the visual pathway. Mutations in this gene have been associated with microphthalmia and developmental dysplasia of the hip. [provided by RefSeq, Jan 2023]	TENM3 (Teneurin Transmembrane Protein 3) is a Protein Coding gene. Diseases associated with TENM3 include Microphthalmia/Coloboma 9 and Macs Syndrome. Gene Ontology (GO) annotations related to this gene include protein homodimerization activity and heme binding. An important paralog of this gene is TENM2.	Involved in neural development by regulating the establishment of proper connectivity within the nervous system. Acts in both pre- and postsynaptic neurons in the hippocampus to control the assembly of a precise topographic projection: required in both CA1 and subicular neurons for the precise targeting of proximal CA1 axons to distal subiculum, probably by promoting homophilic cell adhesion. Req…	NP_001402892.1	0	TENM3
													4.1941e-07	-39.565	57440709
													4.48545e-06	-34.5417	57440727
													1.53477e-05	-32.7778	57440740
													2.20615e-05	-33.857	57440776
													0.000374186	-31.6955	57441335
													0.000207311	-33.5616	57441343
													0.0018686	-25.4509	57443033
													1.61547e-05	-32.5415	57443097
													0.00332999	-25.6204	57453144
													0.00329515	-25.4394	57453159
													0.000109171	-30.4598	57453181
													0.000344455	-27.1361	57453216
													0.000442958	-26.7153	57453219
													0.000146111	-27.958	57453244
													0.000187134	-27.1762	57453251
													0.000246247	-26.8234	57453256
													2.649e-05	-29.9242	57453268
													0.000327346	-26.4151	57453271
													0.000465519	-25.7985	57453282
													0.000124323	-27.6713	57453290
													0.000125108	-27.241	57453300
													0.000455584	-28.6754	57470768
													0.00817609	-25.5779	57471343
													0.00898573	-25.0342	57471352
													0.0037214	-26.2344	57471399
													0.000104783	-33.8749	57471426
													3.22635e-06	-39.5833	57471436
													0.000900871	-30.6106	57471440
													0.000596395	-33.602	57471510
													0.000131115	-36.6401	57471522
													0.000551668	-31.7799	57471523
													0.00310898	-30.1286	57471526
													0.00927814	-27.3913	57471529
													0.00904194	-25.9559	57471530
													0.000486359	-30.6278	57471677
													0.00115652	-29.3108	57471714
													0.00320474	-27.6977	57471723
													0.00323659	-26.8625	57472581
													0.000839391	-30.4671	57472605
													0.00135261	-27.6038	57473171
													3.98687e-05	-34.1944	57473179
													0.000130409	-32.3762	57473184
													0.000197896	-31.6282	57473186
													0.000844894	-28.4021	57473200
													0.00672776	-25.4864	57473228
													0.000609026	-31.7227	57473413
													0.000265472	-33.0586	57473420
													0.000136991	-34.1067	57473467
													7.19389e-05	-34.6932	57473669
													0.000604	-29.3269	57473690
													0.000133939	-32.6667	57473700
													0.000293274	-31.3691	57473706
													6.17001e-05	-36.5151	57473707
													2.79797e-05	-34.4068	57473715
													0.00185034	-29.4761	57473716
													2.6422e-06	-37.0028	57473727
													0.00298739	-26.9841	57473728
													8.90235e-07	-37.963	57473736
													0.000649071	-29.2929	57473737
													6.2387e-05	-31.0867	57473754
													0.000613888	-26.8563	57473773
													0.000190835	-27.6304	57473774
													0.00143778	-25.2739	57473788
													1.11403e-05	-31.4912	57473789
													9.60927e-06	-31.9368	57473792
													2.12099e-06	-33.7988	57473797
													0.000799795	-26.2255	57473836
													0.00297447	-26.7538	57474027
													1.80523e-05	-35.3777	57481995
													0.0041905	-25.8702	57482000
													0.000815102	-29.7076	57482006
													0.000335729	-30.603	57482013
													0.000210687	-31.4318	57482018
													7.38529e-05	-32.6087	57482022
													0.000782435	-27.9007	57482073
													0.000610611	-27.8775	57482075
													0.00122027	-27.034	57482081
													2.18583e-06	-36.1278	57482569
													0.000159909	-30.9174	57482592
													5.26462e-05	-35.9203	57482907
													2.67991e-05	-37.3656	57482962
													0.00342481	-28.2119	57483700
													0.00100118	-26.0753	57484598
													0.000154439	-28.5353	57484607
													0.000704841	-26.4629	57484610
													4.44646e-05	-30.2622	57484618
													0.00156985	-25.752	57484667
													0.00131142	-26.9704	57484728
													0.00118697	-26.5295	57484810
													0.000177902	-30.02	57484812
													0.000195971	-29.6119	57484841
													0.00236847	-25.3949	57484846
													1.74234e-05	-34.2294	57484852
													1.15766e-05	-34.5792	57484858
													0.0016158	-27.2375	57484861
													2.12314e-05	-34.9254	57484883
													5.64163e-05	-33.4328	57484885
													1.10236e-05	-36.2286	57484905
													0.00225662	-28.0423	57484980
													0.000463012	-30.7336	57484994
													8.07983e-06	-37.3377	57484998
													1.29599e-05	-36.1387	57485011
													8.18195e-06	-36.3197	57485013
													7.12618e-07	-39.0262	57485019
													0.0016791	-25.569	57485020
													0.000183435	-30.9262	57485021
													1.11348e-06	-36.8795	57485043
													7.83268e-06	-34.1953	57485052
													0.000199722	-30.4521	57485080
													8.86766e-07	-38.0558	57485082
													2.32741e-05	-33.5489	57485085
													0.000114675	-31.3988	57485092
													0.000163315	-30.8215	57485105
													4.9097e-05	-32.4501	57485111
													0.00582624	-25.7514	57485296
													0.00144762	-29.4469	57485314
													4.2913e-15	-48.1481	57489528
													9.61332e-14	-46.2124	57489533
													1.81958e-13	-45.7326	57489535
													7.85441e-16	-50.4252	57489540
													5.89631e-14	-47.1482	57489542
													1.28e-17	-52.1212	57489545
													4.34478e-17	-53.1795	57489561
													2.08689e-20	-57.7935	57489566
													8.14612e-19	-57.9076	57489580
													1.11741e-18	-59.2228	57489592
													9.57624e-18	-57.7448	57489598
													8.95413e-15	-55.7756	57489620
													5.76597e-14	-55.9902	57489636
													7.60105e-17	-60.8446	57489642
													1.42283e-11	-50.8086	57489645
													3.31602e-13	-54.0829	57489647
													1.2644e-13	-54.4218	57489649
													1.74467e-09	-47.4772	57489661
													5.02901e-10	-49.6829	57489664
													3.38826e-08	-45.1111	57489672
													9.34429e-10	-48.6085	57489678
													2.36211e-12	-54.4833	57489681
													1.12258e-11	-53.74	57489683
													1.35899e-10	-52.0101	57489685
													6.51271e-07	-42.6769	57489700
													4.97644e-05	-35.4895	57489708
													3.53598e-05	-36.9026	57489713
													4.58747e-06	-38.7221	57489716
													3.98955e-05	-35.1662	57489723
													0.000373389	-30.9748	57489729
													0.00136899	-28.4685	57489746
													0.000418438	-29.193	57489772
													9.77185e-05	-32.1379	57489774
													0.000187706	-30.8841	57489783
													0.000121636	-31.7778	57489786
													2.95371e-05	-33.9847	57489788
													0.000209346	-31.145	57489798
													0.00236458	-26.0184	57489811
46	NW_024609839.1	61379975	61403292	minus	LOC115320387	115320387	protein-coding	XM_040211690.3	XP_040067624.1	B7PKQ6	LOW QUALITY PROTEIN: septin-7	453	1.12167e-15	-52.197	61387773	86	unnamed protein product [Homo sapiens]	This gene encodes a protein that is highly similar to the CDC10 protein of Saccharomyces cerevisiae. The protein also shares similarity with Diff 6 of Drosophila and with H5 of mouse. Each of these similar proteins, including the yeast CDC10, contains a GTP-binding motif. The yeast CDC10 protein is a structural component of the 10 nm filament which lies inside the cytoplasmic membrane and is esse…	SEPTIN7 (Septin 7) is a Protein Coding gene. Diseases associated with SEPTIN7 include Amyotrophic Neuralgia and Brachial Plexus Neuropathy. Among its related pathways are MAPK family signaling cascades and ERK Signaling. An important paralog of this gene is SEPTIN5.	Filament-forming cytoskeletal GTPase. Required for normal organization of the actin cytoskeleton. Required for normal progress through mitosis. Involved in cytokinesis. Required for normal association of CENPE with the kinetochore. Plays a role in ciliogenesis and collective cell movements. Forms a filamentous structure with SEPTIN12, SEPTIN6, SEPTIN2 and probably SEPTIN4 at the sperm annulus whi…	BAF83234.1	0	SEPTIN7
													1.93618e-14	-56.9121	61387825
													9.97499e-17	-50.9804	61387832
													1.69097e-17	-63.3901	61387833
													2.82255e-16	-50.558	61387852
													1.72869e-13	-53.9502	61387853
													3.16804e-14	-48.2534	61387869
													6.45269e-18	-61.2952	61387870
													1.20229e-14	-47.1481	61387871
													1.36984e-16	-50.2856	61387885
													9.34964e-18	-62.9317	61387886
													1.61965e-13	-46.8031	61387888
													7.26812e-21	-62.6506	61387889
													4.781e-13	-47.7196	61387899
													1.84347e-22	-66.6667	61387900
													4.3182e-12	-47.8169	61387904
													1.47976e-22	-68.5786	61387905
													2.5892e-17	-62.8792	61387914
													5.42396e-15	-57.8409	61387957
													1.04287e-15	-47.8554	61388067
													1.62931e-13	-43.5392	61388084
													8.05908e-14	-41.9084	61388096
													1.1071e-14	-42.1031	61388108
													9.20131e-14	-38.0509	61388117
													1.80225e-11	-33.3231	61388137
													1.07477e-07	-29.7362	61388143
													1.55853e-07	-30.8794	61388146
													1.64966e-06	-28.9272	61388160
													9.95921e-09	-44.7588	61389028
													6.52713e-07	-36.8841	61389057
													1.31948e-08	-40.1976	61389075
													7.48527e-12	-45.2727	61389081
													1.35285e-08	-39.5299	61389087
													4.43767e-07	-36.0412	61389102
													6.03107e-06	-32.1739	61389125
													8.25924e-08	-36.8849	61389129
													2.60652e-08	-35.7153	61389457
													1.88315e-06	-31.554	61389475
													6.11587e-06	-30.2521	61389490
													4.06496e-09	-35.6446	61389493
													1.23751e-05	-27.9777	61389516
													3.37145e-06	-29.5082	61389531
													9.41756e-05	-25.6	61389535
													1.06131e-06	-30.4	61389539
													3.24069e-08	-25.9554	61390768
													2.72461e-09	-29.2073	61390772
													8.20745e-08	-27.0124	61390776
													5.14417e-05	-28.1991	61393970
													9.18293e-06	-26.744	61396358
													2.28869e-05	-25.1623	61396593
													7.18406e-07	-29.5302	61396614
													1.10383e-06	-30.444	61396629
													3.56675e-05	-27.4084	61396638
													2.94809e-05	-29.1219	61396665
													6.02082e-06	-32.6718	61396680
													6.52291e-06	-27.419	61396761
													3.66418e-05	-25.2269	61396775
													1.59021e-06	-28.3808	61396789
													1.00256e-06	-28.9157	61396802
													3.74968e-06	-27.6203	61396808
													1.52754e-07	-31.3126	61396818
													2.86761e-08	-32.6616	61396824
													3.44636e-13	-39.4807	61396830
													2.81213e-07	-30.8202	61396837
													2.24713e-06	-29.0145	61396890
													1.37361e-07	-31.6316	61396893
													1.70398e-05	-26.212	61396909
													1.20472e-05	-26.4352	61396916
													6.42939e-07	-29.5811	61396921
													1.06497e-05	-26.8181	61396935
													1.49064e-05	-26.4652	61398777
													2.85627e-06	-26.6396	61398831
													4.66793e-05	-25.5324	61399079
													1.28908e-06	-30.3269	61399106
													1.80446e-05	-27.4708	61399109
													8.03152e-08	-32.7446	61399115
													1.32855e-07	-32.2851	61399122
													1.33219e-06	-28.5987	61399137
													1.13511e-08	-32.6441	61399154
													4.6159e-12	-36.9792	61399163
													4.52377e-10	-35.1375	61399165
													2.22653e-08	-32.1869	61399177
													7.16635e-07	-29.5304	61399179
													4.77977e-06	-27.1329	61399182
													5.16418e-06	-30.1108	61399197
													1.59959e-05	-29.576	61399210
47	NW_024609839.1	90511027	90775096	minus	LOC115331324	115331324	protein-coding	XM_042290028.1	XP_042145962.1		uncharacterized protein LOC115331324 isoform X1	126	0.00126884	-27.5976	90578167	1	no significant similarity found	n/a	n/a	n/a	n/a	n/a	n/a
48	NW_024609839.1	90574547	90581889	plus	LOC115330256	115330256	protein-coding	XM_040503073.2	XP_040359007.2	B7P7Q8	LOW QUALITY PROTEIN: DNA polymerase delta catalytic subunit-like	1312	0.00126884	-27.5976	90578167	1	Polymerase (DNA directed), delta 1, catalytic subunit 125kDa [Homo sapiens]	POLD1 (DNA Polymerase Delta 1, Catalytic Subunit) is a Protein Coding gene. Diseases associated with POLD1 include Mandibular Hypoplasia, Deafness, Progeroid Features, And Lipodystrophy Syndrome and Colorectal Cancer 10. Among its related pathways are DNA repair pathways, full network and Base excision repair. Gene Ontology (GO) annotations related to this gene include nucleic acid binding and ch…	As the catalytic component of the trimeric (Pol-delta3 complex) and tetrameric DNA polymerase delta complexes (Pol-delta4 complex), plays a crucial role in high fidelity genome replication, including in lagging strand synthesis, and repair. Exhibits both DNA polymerase and 3'- to 5'-exonuclease activities (PubMed:16510448, 19074196, 20334433, 24022480, 24035200). Requires the presence of accessor…	not given	AAH08800.1	5e-71	POLD1
49	NW_024609846.1	115173	117285	minus	LOC121836011	121836011	protein-coding	XM_042290617.1	XP_042146551.1		uncharacterized protein LOC121836011	484	0.0012697	-25.5814	116287	2	no significant similarity found	n/a	n/a	n/a	n/a	n/a	n/a
													5.33947e-06	-27.1092	116366
50	NW_024609846.1	118393	120222	minus	LOC115327829	115327829	protein-coding	XM_029988893.3	XP_029844753.3		uncharacterized protein LOC115327829	570	0.00408457	-27.3961	119244	10	no significant similarity found	n/a	n/a	n/a	n/a	n/a	n/a
													0.00630406	-26.9986	119262
													0.000346876	-26.7547	119620
													4.86298e-13	-44.0339	119621
													7.05586e-05	-27.1073	119637
													5.9635e-05	-26.1538	119646
													0.000373875	-26.7899	119657
													1.18533e-06	-30.3853	119658
													0.00106849	-29.5536	119784
													0.00109335	-28.6649	119787
51	NW_024609846.1	17265680	17269828	plus	LOC121836198	121836198	protein-coding	XM_042291043.1	XP_042146977.1		uncharacterized protein LOC121836198	239	0.000816449	-27.4014	17267070	3	pol precursor [Homo sapiens]	wasn't given	ERVK-6 (Endogenous Retrovirus Group K Member 6, Envelope) is a Protein Coding gene. Diseases associated with ERVK-6 include Acquired Immunodeficiency Syndrome and T-Cell Acute Lymphoblastic Leukemia. Among its related pathways is Gastric cancer network 1. Gene Ontology (GO) annotations related to this gene include nucleic acid binding and structural molecule activity.	Retroviral envelope proteins mediate receptor recognition and membrane fusion during early infection. Endogenous envelope proteins may have kept, lost or modified their original function during evolution. This endogenous envelope protein has lost its original fusogenic properties. ( ENK6_HUMAN,Q69384 ) SU mediates receptor recognition. ( ENK6_HUMAN,Q69384 ) TM anchors the envelope heterodimer to …	AAY87453.1	0.002	ERVK-6
													0.000785663	-27.369	17267073
													0.000271506	-29.0381	17267082
52	NW_024609846.1	81529107	81568353	plus	LOC8037629	8037629	protein-coding	XM_040209174.3	XP_040065108.1	B7Q8V6	deoxynucleoside triphosphate triphosphohydrolase SAMHD1 isoform X1	522	0.000100195	-35.3814	81551453	17	Chain A, DEOXYNUCLEOSIDE TRIPHOSPHATE TRIPHOSPHOHYDROLASE SAMHD1 [Homo sapiens]	n/a	n/a	n/a	5AO1_A	4e-89	no gene
													0.00158887	-28.8521	81551464
													0.000541097	-30.5556	81551467
													0.000206952	-31.0072	81551476
													3.76598e-06	-33.3021	81551493
													2.44918e-05	-31.6479	81551496
													1.96717e-07	-35.6253	81551518
													1.54506e-06	-31.9392	81551526
													8.1378e-08	-36.6279	81551535
													7.70428e-05	-29.1706	81551539
													7.25222e-06	-31.3953	81551543
													6.17519e-05	-28.4884	81551546
													0.000391858	-28.1217	81551553
													3.47333e-07	-35.6322	81551556
													6.38584e-05	-30.1957	81551568
													3.85087e-06	-33.4483	81551577
													0.0024794	-26.4439	81551590
53	NW_024609846.1	98138100	98286144	plus	LOC8039649	8039649	protein-coding	XM_029974730.4	XP_029830590.2	B7QDK0	helicase domino	3147	1.50106e-05	-26.8548	98267780	14	Snf2 related CREBBP activator protein [Homo sapiens]	n/a	n/a	n/a	KAI2578197.1	0	no gene
													2.94785e-11	-32.4974	98267795
													1.03281e-09	-28.758	98267799
													7.59862e-09	-27.2549	98267802
													1.40289e-09	-28.1584	98267807
													1.46861e-09	-26.9595	98267809
													2.1313e-10	-27.6978	98267814
													5.42463e-10	-25.873	98267823
													2.75804e-11	-27.4067	98267825
													1.85315e-09	-25.5255	98267831
													2.08562e-11	-27.2727	98267834
													1.55525e-12	-28.3261	98267843
													2.18851e-10	-25.3051	98267850
													1.61484e-10	-25.0814	98267854
54	NW_024609846.1	113416844	113446967	plus	LOC8033621	8033621	protein-coding	XM_042290890.1	XP_042146824.1	B7PZE2	pescadillo	602	0.00023116	-27.0539	113439087	14	pescadillo homolog isoform 1 [Homo sapiens]	This gene encodes a nuclear protein that contains a breast cancer associated gene 1 (BRCA1) C-terminal interaction domain. The encoded protein interacts with BOP1 and WDR12 to form the PeBoW complex, which plays a critical role in cell proliferation via pre-rRNA processing and 60S ribosomal subunit maturation. Expression of this gene may play an important role in breast cancer proliferation and t…	PES1 (Pescadillo Ribosomal Biogenesis Factor 1) is a Protein Coding gene. Diseases associated with PES1 include Shwachman-Diamond Syndrome 1 and Breast Cancer. Among its related pathways are rRNA processing in the nucleus and cytosol and Processing of Capped Intron-Containing Pre-mRNA. Gene Ontology (GO) annotations related to this gene include RNA binding and ribonucleoprotein complex binding.	Component of the PeBoW complex, which is required for maturation of 28S and 5.8S ribosomal RNAs and formation of the 60S ribosome. ( PESC_HUMAN,O00541 )	NP_055118.1	0	PES1
													0.00024865	-27.5531	113439097
													0.000120291	-28.4912	113439100
													2.21414e-06	-33.7443	113439124
													1.51047e-07	-36.4964	113439131
													8.09652e-05	-28.6125	113439133
													1.20599e-06	-34.058	113439135
													7.16001e-07	-34.4682	113439138
													0.00391296	-27.6321	113439139
													2.9124e-08	-38.1455	113439141
													0.00049213	-31.8499	113439142
													1.90182e-05	-31.3938	113439151
													4.10426e-05	-31.0853	113439159
													9.07259e-05	-30.2834	113439162
55	NW_024609846.1	123184712	123190361	minus	LOC120846555	120846555	protein-coding	XM_040218363.3	XP_040074297.3		putative nuclease HARBI1	347	0.000689813	-27.709	123189206	3	putative nuclease HARBI1 [Homo sapiens]	Predicted to enable metal ion binding activity and nuclease activity. Predicted to be involved in nucleic acid phosphodiester bond hydrolysis. Located in centriolar satellite; cytosol; and plasma membrane. [provided by Alliance of Genome Resources, Apr 2022]	HARBI1 (Harbinger Transposase Derived 1) is a Protein Coding gene. Diseases associated with HARBI1 include Immunodeficiency 63 With Lymphoproliferation And Autoimmunity and Developmental Dysplasia Of The Hip 1. Gene Ontology (GO) annotations related to this gene include hydrolase activity, acting on ester bonds and nuclease activity.	Transposase-derived protein that may have nuclease activity (Potential). Does not have transposase activity. ( HARB1_HUMAN,Q96MB7 )	NP_776172.1	3e-67	HARBI1
													0.000163979	-27.398	123189222
													7.09946e-05	-25.1685	123189243
56	NW_024609846.1	130083875	130172988	plus	LOC8050718	8050718	protein-coding	XM_042290950.1	XP_042146884.1		nascent polypeptide-associated complex subunit alpha, muscle-specific form	704	2.58013e-06	-31.5912	130117900	3	no significant similarity found	n/a	n/a	n/a	n/a	n/a	n/a
													0.000591115	-26.1803	130117902
													0.000235689	-28.3059	130117905
57	NW_024609846.1	134274713	134306113	minus	LOC8041685	8041685	protein-coding	XM_029987871.4	XP_029843731.3	B7QIB7	mitogen-activated protein kinase 1	378	0.000542695	-28.9292	134285112	8	40kDa protein kinase [Homo sapiens]	This gene encodes a member of the MAP kinase family. MAP kinases, also known as extracellular signal-regulated kinases (ERKs), act as an integration point for multiple biochemical signals, and are involved in a wide variety of cellular processes such as proliferation, differentiation, transcription regulation and development. The activation of this kinase requires its phosphorylation by upstream …	MAPK1 (Mitogen-Activated Protein Kinase 1) is a Protein Coding gene. Diseases associated with MAPK1 include Noonan Syndrome 13 and Specific Learning Disability. Among its related pathways are Prolactin Signaling and Toll Like Receptor 7/8 (TLR7/8) Cascade. Gene Ontology (GO) annotations related to this gene include transferase activity, transferring phosphorus-containing groups and protein tyrosi…	Serine/threonine kinase which acts as an essential component of the MAP kinase signal transduction pathway. MAPK1/ERK2 and MAPK3/ERK1 are the 2 MAPKs which play an important role in the MAPK/ERK cascade. They participate also in a signaling cascade initiated by activated KIT and KITLG/SCF. Depending on the cellular context, the MAPK/ERK cascade mediates diverse biological functions such as cell g…	5BUE_A	0	MAPK1
													0.000308776	-30.2643	134285115
													0.00149859	-27.0413	134285123
													5.38562e-06	-34.8604	134285126
													0.000305155	-29.5276	134285137
													5.46054e-06	-35.9152	134285146
													6.20188e-05	-33.0492	134285155
													1.99477e-05	-31.2616	134285158
58	NW_024609846.1	138046687	138058745	plus	LOC115333106	115333106	protein-coding	XM_040206531.3	XP_040062465.3	B7PKL8	uncharacterized protein LOC115333106	856	2.42583e-11	-48.726	138050212	5	THAP domain-containing protein 6 isoform X4 [Homo sapiens]	Predicted to enable DNA binding activity and metal ion binding activity. Located in microtubule cytoskeleton. [provided by Alliance of Genome Resources, Apr 2022]	THAP6 (THAP Domain Containing 6) is a Protein Coding gene. Diseases associated with THAP6 include Retinitis Pigmentosa. Gene Ontology (GO) annotations related to this gene include nucleic acid binding. An important paralog of this gene is THAP3.	not given	XP_006714172.1	3e-07	THAP6
													8.57111e-09	-42.9677	138050221
													2.27017e-09	-44.9353	138050225
													3.30053e-09	-44.5207	138050238
													0.000282153	-25.9347	138053312
59	NW_024609846.1	139881797	140314230	minus	LOC8035386	8035386	protein-coding	XM_029985409.3	XP_029841269.3	B7Q3L1	pleckstrin homology domain-containing family G member 5 isoform X2	943	0.00622223	-29.3182	139901358	1	pleckstrin homology and RhoGEF domain containing G5 [Homo sapiens]	n/a	n/a	n/a	KAI4078410.1	1e-102	no gene
60	NW_024609846.1	144497670	144553586	minus	LOC8038354	8038354	protein-coding	XM_040220782.2	XP_040076716.1	B7QAK4	leucine-zipper-like transcriptional regulator 1	795	0.00266497	-27.4126	144550686	1	leucine-zipper-like transcriptional regulator 1 [Homo sapiens]	n/a	n/a	n/a	NP_006758.2	0	no gene
61	NW_024609846.1	150500456	150748529	minus	LOC120843915	120843915	protein-coding	XM_040215388.3	XP_040071322.2	B7Q3V3	uncharacterized protein LOC120843915 isoform X1	857	0.000959809	-29.809	150726902	6	Chain A, Noelin [Homo sapiens]	n/a	n/a	n/a	4XAT_A	6e-34	no gene
													0.00314838	-26.6941	150726906
													7.35784e-05	-33.0454	150726913
													0.00552136	-25.314	150726916
													0.00421172	-28.642	150726988
													0.00140526	-31.8087	150726998
62	NW_024609846.1	171000439	171430981	plus	LOC8039553	8039553	protein-coding	XM_040222261.3	XP_040078195.1	B7QDC5	basement membrane-specific heparan sulfate proteoglycan core protein isoform X1	4410	3.30946e-05	-28.2324	171408433	4	basement membrane-specific heparan sulfate proteoglycan core protein isoform X5 [Homo sapiens]	This gene encodes the perlecan protein, which consists of a core protein to which three long chains of glycosaminoglycans (heparan sulfate or chondroitin sulfate) are attached. The perlecan protein is a large multidomain proteoglycan that binds to and cross-links many extracellular matrix components and cell-surface molecules. It has been shown that this protein interacts with laminin, prolargin,…	HSPG2 (Heparan Sulfate Proteoglycan 2) is a Protein Coding gene. Diseases associated with HSPG2 include Schwartz-Jampel Syndrome, Type 1 and Dyssegmental Dysplasia, Silverman-Handmaker Type. Among its related pathways are Integrin Pathway and Chondroitin sulfate/dermatan sulfate metabolism. Gene Ontology (GO) annotations related to this gene include calcium ion binding and obsolete protein C-term…	Integral component of basement membranes. Component of the glomerular basement membrane (GBM), responsible for the fixed negative electrostatic membrane charge, and which provides a barrier which is both size- and charge-selective. It serves as an attachment substrate for cells. Plays essential roles in vascularization. Critical for normal heart development and for regulating the vascular respons…	XP_047275047.1	0	HSPG2
													0.000516097	-25.2404	171408448
													0.0002592	-25.3239	171408459
													0.000580162	-25.377	171408469
63	NW_024609846.1	199103235	199208080	minus	LOC8024355	8024355	protein-coding	XM_040208118.3	XP_040064052.1		putative N-acetylated-alpha-linked acidic dipeptidase isoform X1	850	1.17732e-05	-34.7652	199118848	14	glutamate carboxypeptidase 2 isoform X4 [Homo sapiens]	This gene encodes a type II transmembrane glycoprotein belonging to the M28 peptidase family. The protein acts as a glutamate carboxypeptidase on different alternative substrates, including the nutrient folate and the neuropeptide N-acetyl-l-aspartyl-l-glutamate and is expressed in a number of tissues such as prostate, central and peripheral nervous system and kidney. A mutation in this gene may …	FOLH1 (Folate Hydrolase 1) is a Protein Coding gene. Diseases associated with FOLH1 include Hyperhomocysteinemia and Lymph Node Carcinoma. Among its related pathways are Metabolism and GPCRs, class C metabotropic glutamate, pheromone. Gene Ontology (GO) annotations related to this gene include peptidase activity and carboxypeptidase activity. An important paralog of this gene is NAALAD2.	Has both folate hydrolase and N-acetylated-alpha-linked-acidic dipeptidase (NAALADase) activity. Has a preference for tri-alpha-glutamate peptides. In the intestine, required for the uptake of folate. In the brain, modulates excitatory neurotransmission through the hydrolysis of the neuropeptide, N-aceylaspartylglutamate (NAAG), thereby releasing glutamate. Involved in prostate tumor progression.…	XP_054224218.1	1e-139	FOLH1
													2.22158e-07	-36.979	199118878
													9.5399e-08	-37.8853	199118882
													3.7322e-11	-44.1652	199118888
													4.87534e-10	-43.3664	199118895
													0.00012069	-26.9638	199118902
													1.33863e-09	-42.3339	199118907
													2.35472e-07	-37.1528	199118910
													1.00741e-06	-33.5031	199118913
													4.91418e-07	-36.5283	199118915
													6.68422e-09	-39.6761	199118923
													4.02794e-08	-39.1304	199118934
													0.00017704	-30.2158	199118959
													4.11877e-05	-32.3937	199118972
64	NW_024609851.1	948648	959581	minus	LOC115318523	115318523	protein-coding	XM_040212085.2	XP_040068019.1		uncharacterized protein LOC115318523	186	0.000528335	-25.871	957210	3	no significant similarity found	n/a	n/a	n/a	n/a	n/a	n/a
													0.000401156	-29.2496	957780
													0.00203445	-26.4024	957808
65	NW_024609857.1	16689	48789	minus	LOC8028948	8028948	protein-coding	XM_042291655.1	XP_042147589.1		uncharacterized protein LOC8028948	1449	7.45e-05	-36.71	30330	1	BTB/POZ domain-containing protein KCTD1 isoform b [Homo sapiens]	This gene encodes a protein containing a BTB (Broad-complex, tramtrack and bric a brac), also known as a POZ (POxvirus and zinc finger) protein-protein interaction domain. The encoded protein negatively regulates the AP-2 family of transcription factors and the Wnt signaling pathway. A mechanism for the modulation of Wnt signaling has been proposed in which the encoded protein enhances ubiquitina…	KCTD1 (Potassium Channel Tetramerization Domain Containing 1) is a Protein Coding gene. Diseases associated with KCTD1 include Scalp-Ear-Nipple Syndrome and Adams-Oliver Syndrome. Among its related pathways are Sweet Taste Signaling and Gene expression (Transcription). Gene Ontology (GO) annotations related to this gene include transcription factor binding and transcription corepressor activity. …	May repress the transcriptional activity of AP-2 family members, including TFAP2A, TFAP2B and TFAP2C to various extent. ( KCTD1_HUMAN,Q719H9 )	NP_001136202.1	1e-20	KCTD1
66	NW_024609857.1	363811	367665	minus	LOC115318018	115318018	protein-coding	XM_040499872.2	XP_040355806.2	B7P8M8	P2X purinoceptor 7	193	0.00082639	-26.6543	366037	1	P2X7 receptor [Homo sapiens]	The product of this gene belongs to the family of purinoceptors for ATP. This receptor functions as a ligand-gated ion channel and is responsible for ATP-dependent lysis of macrophages through the formation of membrane pores permeable to large molecules. Activation of this nuclear receptor by ATP in the cytoplasm may be a mechanism by which cellular activity can be coupled to changes in gene expr…	P2RX7 (Purinergic Receptor P2X 7) is a Protein Coding gene. Diseases associated with P2RX7 include Leukemia, Chronic Lymphocytic and Tularemia. Among its related pathways are Inflammasomes and Platelet homeostasis. Gene Ontology (GO) annotations related to this gene include protein homodimerization activity and signaling receptor activity. An important paralog of this gene is P2RX4.	Receptor for ATP that acts as a ligand-gated ion channel. Responsible for ATP-dependent lysis of macrophages through the formation of membrane pores permeable to large molecules. Could function in both fast synaptic transmission and the ATP-mediated lysis of antigen-presenting cells. In the absence of its natural ligand, ATP, functions as a scavenger receptor in the recognition and engulfment of …	CAA73360.1	1e-11	P2RX7
67	NW_024609857.1	5160953	5247540	plus	LOC8025554	8025554	protein-coding	XM_029976135.3	XP_029831995.2	B7P704	patronin isoform X1	1570	1.19129e-09	-34.346	5205205	12	CAMSAP1L1 protein [Homo sapiens]	Enables microtubule minus-end binding activity. Involved in several processes, including axon development; regulation of dendrite development; and regulation of organelle organization. Located in cytosol and microtubule end. Colocalizes with Golgi apparatus; centrosome; and microtubule minus-end. [provided by Alliance of Genome Resources, Apr 2022]	CAMSAP2 (Calmodulin Regulated Spectrin Associated Protein Family Member 2) is a Protein Coding gene. Diseases associated with CAMSAP2 include Benign Epilepsy With Centrotemporal Spikes and Epilepsy, Myoclonic Juvenile. Gene Ontology (GO) annotations related to this gene include microtubule binding and microtubule minus-end binding. An important paralog of this gene is CAMSAP1.	Key microtubule-organizing protein that specifically binds the minus-end of non-centrosomal microtubules and regulates their dynamics and organization (PubMed:23169647, 24486153, 24706919). Specifically recognizes growing microtubule minus-ends and autonomously decorates and stabilizes microtubule lattice formed by microtubule minus-end polymerization (PubMed:24486153, 24706919). Acts on free mic…	AAH11385.1	1e-50	CAMSAP2
													6.37293e-09	-31.6799	5205216
													9.21639e-08	-30.2755	5205221
													4.27305e-08	-29.987	5205236
													1.51515e-07	-29.7377	5205245
													6.25785e-10	-33.5732	5205250
													1.08861e-08	-30.9035	5205257
													2.34041e-08	-31.3927	5205271
													4.12328e-08	-31.2491	5205274
													6.80395e-09	-32.7778	5205277
													1.78043e-08	-32.8581	5205282
													1.41974e-06	-33.4046	5205299
68	NW_024609857.1	16222396	16375373	minus	LOC115326717	115326717	protein-coding	XM_029987639.4	XP_029843499.3	B7Q4E1	sodium- and chloride-dependent glycine transporter 1	814	0.00085142	-30.0983	16261783	1	sodium- and chloride-dependent glycine transporter 1 isoform X9 [Homo sapiens]	The amino acid glycine acts as an inhibitory neurotransmitter in the central nervous system. The protein encoded by this gene is one of two transporters that stop glycine signaling by removing it from the synaptic cleft. [provided by RefSeq, Jun 2016]	SLC6A9 (Solute Carrier Family 6 Member 9) is a Protein Coding gene. Diseases associated with SLC6A9 include Glycine Encephalopathy With Normal Serum Glycine and Atypical Glycine Encephalopathy. Among its related pathways are Transport of inorganic cations/anions and amino acids/oligopeptides and Nuclear receptors meta-pathway. Gene Ontology (GO) annotations related to this gene include neurotrans…	Sodium- and chloride-dependent glycine transporter (PubMed:8183239). Essential for regulating glycine concentrations at inhibitory glycinergic synapses. ( SC6A9_HUMAN,P48067 ) [Isoform GlyT-1B]: Sodium- and chloride-dependent glycine transporter. ( SC6A9_HUMAN,P48067 ) [Isoform GlyT-1C]: Sodium- and chloride-dependent glycine transporter. ( SC6A9_HUMAN,P48067 )	XP_054194409.1	1e-33	SLC6A9
69	NW_024609857.1	55713296	55723406	minus	LOC8024204	8024204	protein-coding	XM_029978805.2	XP_029834665.2	B7P3V2	mitochondrial potassium channel	365	0.00319012	-27.4886	55720382	1	Coiled-coil domain containing 51 [Homo sapiens]	Enables mitochondrial ATP-gated potassium channel activity. Involved in potassium ion transmembrane transport. Is integral component of mitochondrial inner membrane. Part of mitochondrial ATP-gated potassium channel complex. [provided by Alliance of Genome Resources, Apr 2022]	CCDC51 (Coiled-Coil Domain Containing 51) is a Protein Coding gene. Diseases associated with CCDC51 include Fanconi Anemia, Complementation Group A.	Pore-forming subunit of the mitochondrial ATP-gated potassium channel (mitoK(ATP)) (PubMed:31435016). Together with ATP-binding subunit ABCB8/MITOSUR of the mitoK(ATP) channel, mediates ATP-dependent K(+) currents across the mitochondrial inner membrane (PubMed:31435016). An increase in ATP intracellular levels closes the channel, inhibiting K(+) transport, whereas a decrease in ATP levels enhanc…	AAH11993.1	8e-36	CCDC51
70	NW_024609857.1	66913308	66981506	minus	LOC8029227	8029227	protein-coding	XM_029986463.4	XP_029842323.2		structural maintenance of chromosomes protein 1A	1239	8.55e-06	-25.1531	66929680	1	mitosis-specific chromosome segregation protein SMC1 homolog [Homo sapiens]	n/a	n/a	n/a	AAB34405.1	0	no gene
71	NW_024609857.1	71230245	71288322	plus	LOC8050584	8050584	protein-coding	XM_029978191.4	XP_029834051.2		4-coumarate--CoA ligase 1	497	2.69448e-05	-27.2754	71248263	16	acyl-CoA synthetase medium chain family member 5 [Homo sapiens]	n/a	n/a	n/a	KAI2577488.1	1e-30	no gene
													3.44287e-07	-29.8006	71248274
													4.48797e-06	-27.625	71248277
													7.31594e-07	-26.5581	71248285
													1.25983e-06	-26.0398	71248288
													3.21825e-09	-30.8954	71248294
													8.11747e-08	-25.4216	71248315
													1.48676e-08	-25.0349	71248319
													2.80354e-08	-25.7937	71248324
													8.8643e-10	-26.8817	71248328
													8.38875e-11	-27.9746	71248375
													5.8122e-08	-25.2999	71248392
													8.65018e-09	-26.1824	71248429
													4.89195e-08	-25.8488	71248433
													6.83165e-10	-28.4964	71248436
													6.0922e-10	-28.0965	71248440
72	NW_024609857.1	77873089	77971136	plus	LOC115324180	115324180	protein-coding	XM_042291462.1	XP_042147396.1	B7Q2U6	indolethylamine N-methyltransferase-like	266	0.00461352	-25.6614	77951199	8	indolethylamine N-methyltransferase isoform 1 [Homo sapiens]	N-methylation of endogenous and xenobiotic compounds is a major method by which they are degraded. This gene encodes an enzyme that N-methylates indoles such as tryptamine. Alternative splicing results in multiple transcript variants. Read-through transcription also exists between this gene and the downstream MINDY4 (aka FAM188B) gene. In rodents and other mammals such as cetartiodactyla this gen…	INMT (Indolethylamine N-Methyltransferase) is a Protein Coding gene. Diseases associated with INMT include Hallucinogen Abuse and Nephrolithiasis. Among its related pathways are methionine degradation and Peptide chain elongation. Gene Ontology (GO) annotations related to this gene include methyltransferase activity and amine N-methyltransferase activity.		NP_006765	1e-29	INMT
													0.00129049	-27.9235	77951207
													0.00103687	-28.9313	77951214
													0.000564685	-27.7668	77951241
													0.000489482	-27.8945	77951278
													0.000468611	-28.4371	77951288
													0.00034148	-28.549	77951292
													0.000392563	-28.638	77951312
73	NW_024609857.1	91800053	91900353	plus	LOC8033347	8033347	protein-coding	XM_029983121.4	XP_029838981.2	B7PYR4	zinc finger MYM-type protein 4	1240	3.2877e-05	-29.3417	91823084	8	unnamed protein product [Homo sapiens]	Enables DNA binding activity. Involved in several processes, including PERK-mediated unfolded protein response; intrinsic apoptotic signaling pathway in response to endoplasmic reticulum stress; and positive regulation of transcription, DNA-templated. Located in nucleoplasm. [provided by Alliance of Genome Resources, Apr 2022]	QRICH1 (Glutamine Rich 1) is a Protein Coding gene. Diseases associated with QRICH1 include Ververi-Brady Syndrome and Alacrima, Achalasia, And Impaired Intellectual Development Syndrome. An important paralog of this gene is ZMYM4.	Transcriptional regulator that acts as a mediator of the integrated stress response (ISR) through transcriptional control of protein homeostasis under conditions of ER stress (PubMed:33384352). Controls the outcome of the unfolded protein response (UPR) which is an ER-stress response pathway (PubMed:33384352). ER stress induces QRICH1 translation by a ribosome translation re-initiation mechanism …	BAA91042.1	2e-68	QRICH1
													0.000355948	-25.8669	91823087
													5.50198e-05	-28.566	91823108
													0.000704612	-25.3668	91823124
													1.76185e-06	-31.8817	91823128
													0.000212702	-26.4686	91823130
													0.000100517	-27.2917	91823144
													2.49596e-05	-29.3308	91823155
74	NW_024609857.1	122676327	122711018	plus	LOC8041333	8041333	protein-coding	XM_040219496.1	XP_040075430.1	B7QHH5	peptidase M20 domain-containing protein 2-like	405	1.47108e-05	-27.035	122706755	3	xaa-Arg dipeptidase [Homo sapiens]	Enables dipeptidase activity and identical protein binding activity. Acts upstream of or within proteolysis and regulation of cellular protein metabolic process. Located in nucleoplasm. [provided by Alliance of Genome Resources, Apr 2022]	PM20D2 (Peptidase M20 Domain Containing 2) is a Protein Coding gene. Diseases associated with PM20D2 include Gnathodiaphyseal Dysplasia. Gene Ontology (GO) annotations related to this gene include hydrolase activity.	Catalyzes the peptide bond hydrolysis in dipeptides having basic amino acids lysine, ornithine or arginine at C-terminus. Postulated to function in a metabolite repair mechanism by eliminating alternate dipeptide by-products formed during carnosine synthesis. ( P20D2_HUMAN,Q8IYS1 )	NP_001010853.1	1e-107	PM20D2
													8.29626e-06	-25.244	122706851
													9.92713e-06	-26.2101	122706871
75	NW_024609857.1	125822851	125885113	plus	LOC8039194	8039194	protein-coding	XM_029966490.4	XP_029822350.2	B7QCI7	membrane metallo-endopeptidase-like 1	756	0.000142324	-26.6516	125861579	3	MMEL1 protein [Homo sapiens]	The protein encoded by this gene is a member of the neutral endopeptidase (NEP) or membrane metallo-endopeptidase (MME) family. Family members play important roles in pain perception, arterial pressure regulation, phosphate metabolism and homeostasis. This protein is a type II transmembrane protein and is thought to be expressed as a secreted protein. This gene is expressed mainly in testis with …	MMEL1 (Membrane Metalloendopeptidase Like 1) is a Protein Coding gene. Diseases associated with MMEL1 include Primary Biliary Cholangitis and Tricuspid Valve Disease. Among its related pathways are A-beta Uptake and Degradation and A-beta Plaque Formation and APP Metabolism. Gene Ontology (GO) annotations related to this gene include metalloendopeptidase activity. An important paralog of this gen…	Metalloprotease involved in sperm function, possibly by modulating the processes of fertilization and early embryonic development. Degrades a broad variety of small peptides with a preference for peptides shorter than 3 kDa containing neutral bulky aliphatic or aromatic amino acid residues. Shares the same substrate specificity with MME and cleaves peptides at the same amide bond (By similarity).…	AAI01029.2	4e-37	MMEL1
													0.000241713	-25.1588	125861625
													0.000126911	-27.2284	125861638
76	NW_024609857.1	139313184	139315588	plus	LOC120840411	120840411	protein-coding	XM_040210930.3	XP_040066864.1		uncharacterized protein LOC120840411	565	4.31783e-06	-35.6781	139313717	8	no significant similarity	n/a	n/a	n/a	n/a	n/a	n/a
													2.70359e-06	-34.8631	139313725
													5.69269e-06	-30.0403	139313774
													3.92083e-05	-29.8625	139313809
													0.000166056	-27.3118	139313824
													0.000449203	-25.727	139313827
													7.20378e-06	-31.1822	139313833
													0.000470581	-26.1842	139313862
77	NW_024609857.1	144101772	144128552	plus	LOC8052428	8052428	protein-coding	XM_002434587.5	XP_002434632.4	B7PLI4	androgen-dependent TFPI-regulating protein	232	1.60469e-06	-27.9774	144115317	12	androgen-induced gene 1 protein isoform h [Homo sapiens]	Enables hydrolase activity. Involved in long-chain fatty acid catabolic process. Located in membrane. [provided by Alliance of Genome Resources, Apr 2022]	AIG1 (Androgen Induced 1) is a Protein Coding gene. Diseases associated with AIG1 include Amebiasis and Alzheimer Disease 17. An important paralog of this gene is ADTRP.	Hydrolyzes bioactive fatty-acid esters of hydroxy-fatty acids (FAHFAs), but not other major classes of lipids (PubMed:27018888). Show a preference for FAHFAs with branching distal from the carboxylate head group of the lipids (PubMed:27018888). ( AIG1_HUMAN,Q9NVV5 )	NP_001353275.1	1e-32	AIG1
													7.01896e-07	-29.5391	144115329
													3.18455e-07	-28.3459	144115339
													2.57742e-08	-29.9444	144115350
													4.40422e-06	-26.8063	144115370
													3.2461e-07	-28.1878	144115375
													2.68339e-06	-25.9696	144115384
													1.40735e-06	-26.7218	144115406
													4.35906e-07	-29.184	144115410
													1.68609e-06	-26.8848	144115420
													4.21494e-06	-28.7163	144115458
													0.000139409	-25.6585	144115468
78	NW_024609857.1	148236697	148414310	plus	LOC8041497	8041497	protein-coding	XM_040206018.3	XP_040061952.1	B7QHW3	trithorax group protein osa isoform X5	1864	0.00038815	-26.2081	148404307	1	AT-rich interaction domain 1B [Homo sapiens]	n/a	n/a	n/a	KAI4020382.1	6e-135	no gene
79	NW_024609857.1	157481343	157482027	minus	LOC120844480	120844480	protein-coding	XM_040216271.3	XP_040072205.1		uncharacterized protein LOC120844480	179	0.0005884	-28.9069	157481578	1	SLTP003 [Homo sapiens]	n/a	n/a	n/a	AAM12422.1	3e-14	no gene
80	NW_024609857.1	157520768	157521900	minus	LOC120844468	120844468	protein-coding	XM_040503075.2	XP_040359009.2		uncharacterized protein LOC120844468	371	2.01812e-06	-39.1312	157521618	16	no significant similarity found	n/a	n/a	n/a	n/a	n/a	n/a
													0.0054857	-25.3886	157521622
													0.00170856	-28.1991	157521627
													3.36919e-06	-38.1898	157521631
													1.45123e-05	-37.0101	157521649
													7.87788e-06	-37.4795	157521652
													1.05985e-05	-38.7093	157521712
													0.00348852	-27.9557	157521713
													4.86417e-05	-36.4726	157521717
													0.000128709	-36.8461	157521718
													2.20062e-05	-37.8551	157521724
													2.12509e-05	-38.75	157521725
													0.000915765	-30.9437	157521730
													2.95371e-05	-39.8496	157521731
													2.12496e-05	-37.908	157521733
													0.000842757	-33.6907	157521734
81	NW_024609857.1	168506785	168607086	minus	LOC8039352	8039352	protein-coding	XM_029972573.4	XP_029828433.2	B7QCV5	polynucleotide 5'-hydroxyl-kinase NOL9 isoform X1	771	1.58198e-13	-47.8147	168570997	3	NOL9 protein [Homo sapiens]	Enables polynucleotide 5'-hydroxyl-kinase activity. Involved in maturation of 5.8S rRNA. Located in intermediate filament cytoskeleton and nucleolus. [provided by Alliance of Genome Resources, Apr 2022]	NOL9 (Nucleolar Protein 9) is a Protein Coding gene. Diseases associated with NOL9 include Hyperaldosteronism, Familial, Type I and Shwachman-Diamond Syndrome 1. Among its related pathways are rRNA processing in the nucleus and cytosol and Processing of Capped Intron-Containing Pre-mRNA. Gene Ontology (GO) annotations related to this gene include RNA binding and polynucleotide 5'-hydroxyl-kinase …	Polynucleotide kinase that can phosphorylate the 5'-hydroxyl groups of single-stranded and double-stranded RNA and DNA substrates (PubMed:21063389). Involved in rRNA processing and its kinase activity is required for the processing of the 32S precursor into 5.8S and 28S rRNAs, more specifically for the generation of the major 5.8S(S) form (PubMed:21063389). Required for the efficient pre-rRNA pro…	AAH94836.1	6e-50	NOL9
													1.00007e-24	-64.0733	168571060
													3.07758e-25	-62.7896	168571086
82	NW_024609857.1	190216464	190289827	minus	LOC8036079	8036079	protein-coding	XM_040208381.3	XP_040064315.1		uncharacterized protein LOC8036079 isoform X1	1770	0.000810127	-25.3383	190234938	10	unnamed protein product [Homo sapiens]	Predicted to enable dioxygenase activity and metal ion binding activity. Predicted to be involved in chromatin organization. Predicted to be active in nucleus. [provided by Alliance of Genome Resources, Apr 2022]	RSBN1 (Round Spermatid Basic Protein 1) is a Protein Coding gene. Diseases associated with RSBN1 include Immunodeficiency, Common Variable, 1. An important paralog of this gene is RSBN1L.	Histone demethylase that specifically demethylates dimethylated 'Lys-20' of histone H4 (H4K20me2), thereby modulating chromosome architecture. ( RSBN1_HUMAN,Q5VWQ0 )	BAB13974.1	8e-147	RSBN1
													3.98076e-05	-25.9913	190234963
													9.40011e-06	-26.5294	190234969
													1.88263e-05	-25.2356	190234994
													6.08398e-06	-26.3296	190234999
													2.02858e-05	-25.1487	190235014
													1.38885e-06	-27.92	190235024
													1.75517e-06	-27.0489	190235028
													4.58747e-06	-25.7725	190235039
													2.36473e-07	-28.3842	190235046
83	NW_024609857.1	195017793	195081239	plus	LOC8053156	8053156	protein-coding	XM_029976691.3	XP_029832551.2		axoneme-associated protein mst101(2)	1006	5.92775e-08	-29.108	195047037	2	unnamed protein product [Homo sapiens]	Enables DNA binding activity. Involved in several processes, including PERK-mediated unfolded protein response; intrinsic apoptotic signaling pathway in response to endoplasmic reticulum stress; and positive regulation of transcription, DNA-templated. Located in nucleoplasm. [provided by Alliance of Genome Resources, Apr 2022]	QRICH1 (Glutamine Rich 1) is a Protein Coding gene. Diseases associated with QRICH1 include Ververi-Brady Syndrome and Alacrima, Achalasia, And Impaired Intellectual Development Syndrome. An important paralog of this gene is ZMYM4.	Transcriptional regulator that acts as a mediator of the integrated stress response (ISR) through transcriptional control of protein homeostasis under conditions of ER stress (PubMed:33384352). Controls the outcome of the unfolded protein response (UPR) which is an ER-stress response pathway (PubMed:33384352). ER stress induces QRICH1 translation by a ribosome translation re-initiation mechanism …	BAA91042	0	QRICH1
													9.65778e-05	-29.031	195047229
84	NW_024609857.1	198183042	198580799	minus	LOC8039133	8039133	protein-coding	XM_040208992.3	XP_040064926.2		serine-protein kinase ATM	2932	0.000597353	-29.5118	198226864	24	serine-protein kinase ATM isoform X4 [Homo sapiens]	The protein encoded by this gene belongs to the PI3/PI4-kinase family. This protein is an important cell cycle checkpoint kinase that phosphorylates; thus, it functions as a regulator of a wide variety of downstream proteins, including tumor suppressor proteins p53 and BRCA1, checkpoint kinase CHK2, checkpoint proteins RAD17 and RAD9, and DNA repair protein NBS1. This protein and the closely rela…	Ataxia-telangiectasia (A-T) is a recessive disorder resulting from germline mutation of the A-T mutated (ATM) gene on chromosome 11q. Upon sensing double-stranded breaks (DSB), the wild-type kinase encoded by ATM initiates the DNA-damage response by phosphorylating histone H2AX and, subsequently, various other proteins, such as BRCA1 and the MRE11–RAD50–NBS1 (MRN) complex, which are recruited to …	ATM (ATM Serine/Threonine Kinase) is a Protein Coding gene. Diseases associated with ATM include Ataxia-Telangiectasia and Mantle Cell Lymphoma. Among its related pathways are Homologous DNA Pairing and Strand Exchange and Resolution of D-loop Structures through Synthesis-Dependent Strand Annealing (SDSA). Gene Ontology (GO) annotations related to this gene include transferase activity, transferr…	XP_011541146.1	0	ATM
													0.00164877	-27.8007	198226868
													0.00444019	-25.8381	198226871
													0.00234517	-26.2798	198302692
													0.000899315	-29.3642	198302769
													0.00603452	-25.5306	198302777
													0.00952388	-26.8511	198330965
													0.000620095	-29.5798	198372316
													0.00110027	-29.3471	198372365
													0.00184047	-28.2499	198372371
													0.00479456	-26.3682	198372385
													0.00130625	-29.3561	198372388
													0.000221595	-31.7905	198448430
													0.000742873	-32.5687	198448431
													3.48804e-06	-36.7886	198448442
													2.43697e-05	-33.5271	198448455
													1.99116e-06	-38.0956	198448480
													0.000149674	-31.9436	198448491
													0.000194613	-31.6145	198448501
													0.000523186	-30.2776	198448504
													0.00439304	-25.5233	198448507
													0.000105531	-33.7322	198448512
													0.000893476	-27.7343	198538992
													0.0029586	-25.3942	198539044
85	NW_024609857.1	198690944	198999067	minus	LOC8041177	8041177	protein-coding	XM_029993046.4	XP_029848906.3		sarcoplasmic calcium-binding protein 1 isoform X1	196	5.49e-05	-26.9462	198783607	1	no significant similarity found	n/a	n/a	n/a	n/a	n/a	n/a
86	NW_024609868.1	26162029	26262156	plus	LOC8024382	8024382	protein-coding	XM_042292359.1	XP_042148293.1		E3 ubiquitin-protein ligase UBR4	2987	8.39782e-06	-30.6556	26227063	5	E3 ubiquitin-protein ligase UBR4 isoform X47 [Homo sapiens]	The protein encoded by this gene is an E3 ubiquitin-protein ligase that interacts with the retinoblastoma-associated protein in the nucleus and with calcium-bound calmodulin in the cytoplasm. The encoded protein appears to be a cytoskeletal component in the cytoplasm and part of the chromatin scaffold in the nucleus. In addition, this protein is a target of the human papillomavirus type 16 E7 onc…	UBR4 (Ubiquitin Protein Ligase E3 Component N-Recognin 4) is a Protein Coding gene. Diseases associated with UBR4 include Alternating Hemiplegia Of Childhood 2 and Long Qt Syndrome. Among its related pathways are Class I MHC mediated antigen processing and presentation and Innate Immune System. Gene Ontology (GO) annotations related to this gene include binding and ubiquitin-protein transferase a…	E3 ubiquitin-protein ligase involved in different protein quality control pathways in the cytoplasm (PubMed:25582440, 29033132, 34893540, 37891180, 38030679, 38182926, 38297121). Component of the N-end rule pathway: ubiquitinates proteins bearing specific N-terminal residues that are destabilizing according to the N-end rule, leading to their degradation (PubMed:34893540, 37891180, 38030679). Rec…	XP_054191579.1	0	UBR4
													4.51121e-06	-28.8077	26227072
													5.15785e-05	-29.7836	26227083
													0.000308693	-27.8466	26227093
													0.000125107	-29.913	26227105
87	NW_024609868.1	28419655	28528928	plus	LOC8026662	8026662	protein-coding	XM_002405066.4	XP_002405110.3		uncharacterized protein LOC8026662	355	0.00178278	-27.025	28466922	5	no significant similarity found	n/a	n/a	n/a	n/a	n/a	n/a
													0.00055134	-27.5379	28466945
													0.000166741	-28.7977	28466957
													0.00010777	-28.4355	28466964
													0.000348992	-29.4247	28466978
88	NW_024609868.1	28460846	28478086	minus	LOC115309988	115309988	protein-coding	XM_029968258.3	XP_029824118.1		uncharacterized protein LOC115309988 isoform X2	668	0.00178278	-27.025	28466922	5	BEN domain-containing protein 5 isoform X4 [Homo sapiens]	The protein encoded by this gene is an E3 ubiquitin-protein ligase that interacts with the retinoblastoma-associated protein in the nucleus and with calcium-bound calmodulin in the cytoplasm. The encoded protein appears to be a cytoskeletal component in the cytoplasm and part of the chromatin scaffold in the nucleus. In addition, this protein is a target of the human papillomavirus type 16 E7 onc…	UBR4 (Ubiquitin Protein Ligase E3 Component N-Recognin 4) is a Protein Coding gene. Diseases associated with UBR4 include Alternating Hemiplegia Of Childhood 2 and Long Qt Syndrome. Among its related pathways are Class I MHC mediated antigen processing and presentation and Innate Immune System. Gene Ontology (GO) annotations related to this gene include binding and ubiquitin-protein transferase a…	E3 ubiquitin-protein ligase involved in different protein quality control pathways in the cytoplasm (PubMed:25582440, 29033132, 34893540, 37891180, 38030679, 38182926, 38297121). Component of the N-end rule pathway: ubiquitinates proteins bearing specific N-terminal residues that are destabilizing according to the N-end rule, leading to their degradation (PubMed:34893540, 37891180, 38030679). Rec…	XP_047286476.1	2e-05	BEND5
													0.00055134	-27.5379	28466945
													0.000166741	-28.7977	28466957
													0.00010777	-28.4355	28466964
													0.000348992	-29.4247	28466978
89	NW_024609868.1	34696809	34747602	minus	LOC8030734	8030734	protein-coding	XM_029974992.4	XP_029830852.2		5-phosphohydroxy-L-lysine phospho-lyase isoform X1	492	0.00116694	-31.5148	34710038	1	ethanolamine-phosphate phospho-lyase isoform 1 [Homo sapiens]	Enables ethanolamine-phosphate phospho-lyase activity. Predicted to be located in mitochondrial matrix. [provided by Alliance of Genome Resources, Apr 2022]	ETNPPL (Ethanolamine-Phosphate Phospho-Lyase) is a Protein Coding gene. Diseases associated with ETNPPL include Myasthenic Syndrome, Congenital, 8. Among its related pathways are Glycerophospholipid biosynthesis and Metabolism. Gene Ontology (GO) annotations related to this gene include pyridoxal phosphate binding and ethanolamine-phosphate phospho-lyase activity. An important paralog of this gen…	Catalyzes the pyridoxal-phosphate-dependent breakdown of phosphoethanolamine, converting it to ammonia, inorganic phosphate and acetaldehyde. ( AT2L1_HUMAN,Q8TBG4 )	NP_112569.2	0	ETNPPL
90	NW_024609868.1	42746608	42763819	minus	LOC8033636	8033636	protein-coding	XM_029993063.3	XP_029848923.2	B7PZF2	WD repeat-containing protein 46	555	0.000487999	-33.1169	42757392	14	unnamed protein product [Homo sapiens]	Enables RNA binding activity. Predicted to be involved in maturation of SSU-rRNA from tricistronic rRNA transcript (SSU-rRNA, 5.8S rRNA, LSU-rRNA). Predicted to be located in nucleoplasm. Predicted to be part of small-subunit processome. Predicted to be active in nucleolus. [provided by Alliance of Genome Resources, Apr 2022]	WDR46 (WD Repeat Domain 46) is a Protein Coding gene. Diseases associated with WDR46 include Asthma, Nasal Polyps, And Aspirin Intolerance. Among its related pathways are rRNA processing in the nucleus and cytosol and Processing of Capped Intron-Containing Pre-mRNA. Gene Ontology (GO) annotations related to this gene include RNA binding.	Scaffold component of the nucleolar structure. Required for localization of DDX21 and NCL to the granular compartment of the nucleolus (PubMed:23848194). Part of the small subunit (SSU) processome, first precursor of the small eukaryotic ribosomal subunit. During the assembly of the SSU processome in the nucleolus, many ribosome biogenesis factors, an RNA chaperone and ribosomal proteins associat…	BAF85305.1	2e-170	WDR46
													2.71638e-05	-36.1169	42757401
													0.000789706	-28.7924	42757403
													0.000558213	-30.4048	42757409
													3.3188e-05	-35.0616	42757412
													8.24239e-05	-33.8568	42757421
													0.000487793	-29.6041	42757425
													0.000167216	-31.8019	42757428
													0.000363592	-29.1566	42757432
													0.000807823	-28.5052	42757457
													0.00148639	-27.1867	42757461
													0.00116305	-27.0822	42757463
													0.000401532	-29.9684	42757469
													0.000441701	-27.5448	42757472
91	NW_024609868.1	80068877	80127534	minus	LOC8051686	8051686	protein-coding	XM_040498664.2	XP_040354598.1	B7P1V6	protein PRRC2A isoform X1	2606	0.0033572	-25.1799	80102279	3	unnamed protein product [Homo sapiens]	A cluster of genes, BAT1-BAT5, has been localized in the vicinity of the genes for TNF alpha and TNF beta. These genes are all within the human major histocompatibility complex class III region. This gene has microsatellite repeats which are associated with the age-at-onset of insulin-dependent diabetes mellitus (IDDM) and possibly thought to be involved with the inflammatory process of pancreati…	PRRC2A (Proline Rich Coiled-Coil 2A) is a Protein Coding gene. Diseases associated with PRRC2A include Rheumatoid Arthritis and Diabetes Mellitus. Gene Ontology (GO) annotations related to this gene include RNA binding. An important paralog of this gene is PRRC2C.	May play a role in the regulation of pre-mRNA splicing. ( PRC2A_HUMAN,P48634 )	BAG63968.1	2e-38	PRRC2A
													0.00401463	-25.101	80102334
													0.00120111	-31.2606	80102385
92	NW_024609868.1	83402121	83459563	plus	LOC8043592	8043592	protein-coding	XM_029979665.4	XP_029835525.2		fibrous sheath CABYR-binding protein	503	2.99652e-06	-40.5396	83411364	3	no significant similarity found	n/a	n/a	n/a	n/a	n/a	n/a
													2.11011e-06	-41.331	83411366
													4.82814e-06	-39.6998	83411412
93	NW_024609868.1	84155500	84266972	plus	LOC8033835	8033835	protein-coding	XM_029977787.3	XP_029833647.2		WD repeat-containing protein 6 isoform X1	1062	0.007169	-25.6803	84201473	3	tRNA (34-2'-O)-methyltransferase regulator WDR6 isoform 3 [Homo sapiens]	This gene encodes a member of the WD repeat protein family. WD repeats are minimally conserved regions of approximately 40 amino acids typically bracketed by gly-his and trp-asp (GH-WD), which may facilitate formation of heterotrimeric or multiprotein complexes. The encoded protein interacts with serine/threonine kinase 11, and is implicated in cell growth arrest. Alternative splicing results in …	WDR6 (WD Repeat Domain 6) is a Protein Coding gene. Diseases associated with WDR6 include Tumoral Calcinosis, Normophosphatemic, Familial and Non-Syndromic X-Linked Intellectual Disability. Among its related pathways are Signaling by Rho GTPases and RND3 GTPase cycle. Gene Ontology (GO) annotations related to this gene include RNA binding and insulin receptor substrate binding.	Together with methyltransferase FTSJ1, methylates the 2'-O-ribose of nucleotides at position 34 of the tRNA anticodon loop of substrate tRNAs (PubMed:32558197, 33771871). Required for the correct positioning of the substrate tRNA for methylation (PubMed:32558197). Required to suppress amino acid starvation-induced autophagy (PubMed:22354037). Enhances the STK11/LKB1-induced cell growth suppressio…	NP_001307476.1	1e-89	WDR6
													0.00489657	-25.1488	84201483
													0.00330867	-25.1757	84201485
94	NW_024609868.1	89764792	89877706	plus	LOC8034007	8034007	protein-coding	XM_040223012.2	XP_040078946.1		sarcosine dehydrogenase, mitochondrial	919	2.85771e-05	-33.7663	89781531	9	sarcosine dehydrogenase, mitochondrial precursor [Homo sapiens]	This gene encodes an enzyme localized to the mitochondrial matrix which catalyzes the oxidative demethylation of sarcosine. This enzyme is distinct from another mitochondrial matrix enzyme, dimethylglycine dehydrogenase, which catalyzes a reaction resulting in the formation of sarcosine. Mutations in this gene are associated with sarcosinemia. Alternatively spliced transcript variants have been d…	SARDH (Sarcosine Dehydrogenase) is a Protein Coding gene. Diseases associated with SARDH include Sarcosinemia and Severe Acute Respiratory Syndrome. Among its related pathways are superpathway of choline degradation to L-serine and One-carbon metabolism and related pathways. Gene Ontology (GO) annotations related to this gene include oxidoreductase activity and sarcosine dehydrogenase activity. A…	Catalyzes the last step of the oxidative degradation of choline to glycine. Converts sarcosine into glycine. ( SARDH_HUMAN,Q9UL12 )	NP_001128179.1	0	SARDH
													3.44676e-05	-29.624	89781571
													0.00157694	-30.5615	89781643
													0.000937592	-31.21	89781655
													0.00434	-27.7009	89781682
													3.87627e-05	-36.2809	89781697
													0.000692839	-32.066	89781741
													0.00011787	-31.5092	89781745
													1.49873e-05	-39.697	89781748
95	NW_024609868.1	117345237	117546492	plus	LOC120837598	120837598	protein-coding	XM_042292858.1	XP_042148792.1	B7QF04	cubilin-like	572	0.000511077	-30.6833	117387740	11	bone morphogenetic protein [Homo sapiens]	This gene encodes a protein that is capable of inducing formation of cartilage in vivo. Although other bone morphogenetic proteins are members of the TGF-beta superfamily, this gene encodes a protein that is not closely related to other known growth factors. This gene is expressed as alternatively spliced variants that share an N-terminal protease domain but differ in their C-terminal region. [pr…	BMP1 (Bone Morphogenetic Protein 1) is a Protein Coding gene. Diseases associated with BMP1 include Osteogenesis Imperfecta, Type Xiii and High Bone Mass Osteogenesis Imperfecta. Among its related pathways are Apoptotic Pathways in Synovial Fibroblasts and MIF Mediated Glucocorticoid Regulation. Gene Ontology (GO) annotations related to this gene include calcium ion binding and growth factor acti…	Metalloprotease that plays key roles in regulating the formation of the extracellular matrix (ECM) via processing of various precursor proteins into mature functional enzymes or structural proteins (PubMed:33206546). Thereby participates in several developmental and physiological processes such as cartilage and bone formation, muscle growth and homeostasis, wound healing and tissue repair (PubMed…	AAC41710.1	5e-54	BMP1
													0.000175765	-32.5794	117387744
													9.95547e-06	-37.0177	117387750
													2.16256e-05	-35.3846	117387754
													4.3677e-05	-33.9524	117387759
													7.65037e-07	-38.5435	117387769
													3.20015e-05	-33.0798	117387772
													5.09496e-06	-33.6053	117387798
													3.37017e-06	-33.4521	117387803
													5.94611e-07	-34.3162	117387816
													7.81723e-05	-30.956	117387852
96	NW_024609868.1	133532842	133715201	minus	LOC8025078	8025078	protein-coding	XM_029981062.4	XP_029836922.2	B7PDU5	medium-chain acyl-CoA ligase ACSF2, mitochondrial	593	4.01905e-07	-35.0385	133664937	16	medium-chain acyl-CoA ligase ACSF2, mitochondrial isoform 2 precursor [Homo sapiens]	Enables medium-chain fatty acid-CoA ligase activity. Predicted to be involved in fatty acid metabolic process. Predicted to be located in mitochondrial matrix. [provided by Alliance of Genome Resources, Apr 2022]	ACSF2 (Acyl-CoA Synthetase Family Member 2) is a Protein Coding gene. Among its related pathways are Fatty acid metabolism and Metabolism. Gene Ontology (GO) annotations related to this gene include ligase activity. An important paralog of this gene is ACSF3.	Acyl-CoA synthases catalyze the initial reaction in fatty acid metabolism, by forming a thioester with CoA (PubMed:17762044). Has some preference toward medium-chain substrates (PubMed:17762044). Plays a role in adipocyte differentiation (PubMed:16380219). ( ACSF2_HUMAN,Q96CM8 )	NP_079425.3	3e-119	ACSF2
													8.95991e-05	-27.0435	133664954
													1.29976e-07	-34.1033	133664957
													8.24342e-10	-38.2251	133664969
													2.54271e-09	-36.7639	133664972
													9.24171e-09	-36.0109	133664975
													3.32775e-09	-35.9722	133664978
													7.7063e-10	-38.1055	133664986
													8.27534e-09	-36.6711	133665003
													1.3355e-06	-31.82	133665015
													5.91097e-10	-37.1948	133665018
													1.07563e-09	-37.6681	133665029
													8.4214e-06	-34.1317	133665053
													1.47823e-06	-36.7633	133665056
													9.57319e-07	-37.8299	133665062
													0.000153779	-29.7227	133665068
97	NW_024609868.1	141332004	141433889	plus	LOC8027314	8027314	protein-coding	XM_040222278.3	XP_040078212.1		E3 ubiquitin-protein ligase UHRF1	768	7.73218e-05	-27.0397	141337511	2	E3 ubiquitin-protein ligase UHRF1 isoform 1 [Homo sapiens]	This gene encodes a member of a subfamily of RING-finger type E3 ubiquitin ligases. The protein binds to specific DNA sequences, and recruits a histone deacetylase to regulate gene expression. Its expression peaks at late G1 phase and continues during G2 and M phases of the cell cycle. It plays a major role in the G1/S transition by regulating topoisomerase IIalpha and retinoblastoma gene express…	UHRF1 (Ubiquitin Like With PHD And Ring Finger Domains 1) is a Protein Coding gene. Diseases associated with UHRF1 include Immunodeficiency-Centromeric Instability-Facial Anomalies Syndrome and Colorectal Cancer. Among its related pathways are RNA Polymerase I Promoter Opening and Gene expression (Transcription). Gene Ontology (GO) annotations related to this gene include DNA-binding transcriptio…	Multidomain protein that acts as a key epigenetic regulator by bridging DNA methylation and chromatin modification. Specifically recognizes and binds hemimethylated DNA at replication forks via its YDG domain and recruits DNMT1 methyltransferase to ensure faithful propagation of the DNA methylation patterns through DNA replication. In addition to its role in maintenance of DNA methylation, also p…	NP_001041666.1	0	UHRF1
													0.00398993	-28.3516	141344178
98	NW_024609868.1	141448309	141544405	plus	LOC8043092	8043092	protein-coding	XM_029979882.4	XP_029835742.2		abasic site processing protein HMCES isoform X1	406	0.00348667	-25.6367	141538876	13	Chain A, Embryonic stem cell-specific 5-hydroxymethylcytosine-binding protein [Homo sapiens]	n/a	n/a	n/a	5KO9_A	8e-63	no gene
													0.00125392	-27.6692	141538881
													0.000844829	-28.3208	141538890
													2.99133e-05	-33.7592	141538917
													3.35859e-06	-37.0087	141538931
													7.84268e-05	-32.5878	141538936
													0.00175387	-26.8398	141538940
													0.000187715	-31.0869	141538942
													9.79764e-05	-34.8208	141538972
													0.00188351	-29.1149	141538975
													0.000209866	-34.8707	141538989
													0.00304475	-29.6861	141538996
													0.000100472	-37.2457	141539003
99	NW_024609868.1	160821266	160979084	minus	LOC8054090	8054090	protein-coding	XM_040501061.2	XP_040356995.1		nuclear factor NF-kappa-B p110 subunit isoform X1	604	1.98e-05	-26.6447	160833642	1	nuclear factor of kappa light polypeptide gene enhancer in B-cells 2 (p49/p100), isoform CRA_c [Homo sapiens]	n/a	n/a	n/a	EAW49703.1	3e-48	no gene
100	NW_024609868.1	171202632	171297881	minus	LOC8037522	8037522	protein-coding	XM_040214816.3	XP_040070750.2	B7Q8L8	serine/threonine-protein kinase N2	1032	0.00324125	-28.1338	171239075	7	protein kinase N2, isoform CRA_c [Homo sapiens]	Enables RNA polymerase binding activity; histone deacetylase binding activity; and protein serine/threonine kinase activity. Involved in several processes, including apical junction assembly; positive regulation of cell cycle; and positive regulation of viral genome replication. Located in several cellular components, including cleavage furrow; cytoskeleton; and midbody. [provided by Alliance of …	PKN2 (Protein Kinase N2) is a Protein Coding gene. Diseases associated with PKN2 include Toe Syndactyly, Telecanthus, And Anogenital And Renal Malformations and Bubonic Plague. Among its related pathways are Signaling by Rho GTPases and RHOC GTPase cycle. Gene Ontology (GO) annotations related to this gene include RNA binding and protein kinase activity. An important paralog of this gene is PKN1.	PKC-related serine/threonine-protein kinase and Rho/Rac effector protein that participates in specific signal transduction responses in the cell. Plays a role in the regulation of cell cycle progression, actin cytoskeleton assembly, cell migration, cell adhesion, tumor cell invasion and transcription activation signaling processes. Phosphorylates CTTN in hyaluronan-induced astrocytes and hence de…	EAW73163.1	0	PKN2
													0.00056688	-33.1025	171239079
													0.000561929	-32.619	171239100
													0.00155726	-30.5229	171239112
													0.000316322	-34.3027	171239123
													0.0011406	-31.1077	171239129
													0.00171885	-31.2179	171276482
101	NW_024609873.1	2776268	2791183	minus	LOC115316013	115316013	protein-coding	XM_040215296.2	XP_040071230.1		uncharacterized protein LOC115316013 isoform X1	484	1.0122e-06	-36.2749	2780300	37	no significant similarity found	n/a	n/a	n/a	n/a	n/a	n/a
													1.58764e-09	-38.6792	2780311
													3.00477e-05	-31.1969	2780335
													2.56729e-10	-26.4349	2780411
													3.416e-08	-25.2598	2780412
													3.20954e-10	-25.1882	2780422
													7.35744e-10	-28.2471	2780485
													7.50681e-07	-27.4178	2780486
													2.98742e-13	-33.9576	2780496
													1.37766e-09	-31.9328	2780497
													2.06128e-12	-33.1999	2780506
													1.17188e-07	-31.8011	2780507
													1.76714e-18	-26.5482	2781360
													5.2475e-31	-32.7434	2781394
													1.1974e-25	-32.1101	2781404
													4.34973e-30	-32.8704	2781406
													1.76714e-18	-28.9893	2781408
													3.93e-23	-32.2391	2781414
													3.43953e-22	-30.2266	2781420
													1.2588e-23	-32.7138	2781422
													1.02574e-20	-32.2151	2781427
													6.59112e-19	-29.4622	2781433
													4.49288e-22	-32.8197	2781436
													3.22394e-19	-33.8271	2781451
													1.21805e-17	-31.3628	2781453
													8.2666e-20	-33.8	2781456
													7.40157e-19	-33.416	2781460
													1.68192e-21	-39.5117	2781474
													2.5801e-18	-41.3043	2781499
													2.97945e-08	-34.3137	2786117
													2.02855e-07	-30.4688	2786144
													1.5667e-06	-28.0495	2786156
													2.32896e-07	-28.8288	2786161
													2.0634e-06	-27.5891	2786166
													1.89807e-07	-26.6917	2786192
													3.30523e-06	-29.2735	2786313
													6.98555e-06	-26.6005	2786322
102	NW_024609873.1	4701981	4933873	minus	LOC8030520	8030520	protein-coding	XM_042293095.1	XP_042149029.1		protein unc-80 homolog	2882	2.29367e-07	-27.5591	4708772	5	protein unc-80 homolog isoform 3 [Homo sapiens]	n/a	n/a	n/a	NP_001358915.1	0	no gene
													2.56106e-06	-28.7309	4708778
													1.53309e-07	-27.8689	4708792
													7.17339e-06	-28.3774	4708847
													0.000287831	-25.8052	4708853
103	NW_024609879.1	66939354	66969269	minus	LOC115310957	115310957	protein-coding	XM_040216666.3	XP_040072600.1	B7P8H5	protein krueppel	121	0.00769628	-27.6718	66964106	1	unnamed protein product [Homo sapiens]	Predicted to enable DNA-binding transcription repressor activity, RNA polymerase II-specific and RNA polymerase II transcription regulatory region sequence-specific DNA binding activity. Predicted to be involved in negative regulation of transcription by RNA polymerase II. Predicted to be located in nucleus. [provided by Alliance of Genome Resources, Apr 2022]	ZNF248 (Zinc Finger Protein 248) is a Protein Coding gene. Among its related pathways is Gene expression (Transcription). Gene Ontology (GO) annotations related to this gene include nucleic acid binding. An important paralog of this gene is ZFP37.	May be involved in transcriptional regulation. ( ZN248_HUMAN,Q8NDW4 )	BAG57314.1	1e-34	ZNF248
104	NW_024609879.1	72573662	72733204	plus	LOC115310914	115310914	protein-coding	XM_040214938.1	XP_040070872.1		uncharacterized protein LOC115310914	288	0.000228471	-30.3937	72688472	11	no significant similarity found	n/a	n/a	n/a	n/a	n/a	n/a
													0.000589212	-29.2716	72688483
													1.64601e-05	-34.1865	72688488
													9.90036e-05	-30.8804	72688492
													8.55333e-06	-34.9671	72688501
													1.15129e-07	-40.9613	72688520
													0.000201039	-30.7743	72688528
													3.32973e-06	-36.3968	72688542
													2.83397e-05	-33.8413	72688544
													6.77294e-06	-35.6896	72688567
													0.000247551	-32.2735	72688605
105	NW_024609879.1	73991680	74047455	minus	LOC8024699	8024699	protein-coding	XM_029974138.4	XP_029829998.3		uncharacterized protein LOC8024699 isoform X4	460	3.18143e-05	-29.104	74029475	11	hCG2040263, isoform CRA_b [Homo sapiens]	Predicted to be integral component of membrane. [provided by Alliance of Genome Resources, Apr 2022]	SMIM13 (Small Integral Membrane Protein 13) is a Protein Coding gene.	wasn't given	EAW55298.1	1e-26	SMIM13
													0.00574198	-25.5697	74029719
													0.00521628	-26.1791	74029725
													6.41041e-05	-26.3306	74029742
													1.66433e-05	-29.1468	74029751
													1.78074e-05	-33.3462	74029752
													3.16758e-05	-29.7214	74029777
													0.00497712	-26.2264	74029778
													1.29049e-07	-40.9942	74029795
													2.12154e-05	-40.177	74029828
													0.000569985	-35.5769	74029834
106	NW_024609879.1	87398959	87412959	plus	LOC8027928	8027928	protein-coding	XM_029988184.4	XP_029844044.3	B7PCM2	UPF0415 protein C7orf25 homolog	462	3.4962e-06	-30.5295	87400836	2	unnamed protein product [Homo sapiens]	wasn't given	C7orf25 (Chromosome 7 Open Reading Frame 25) is a Protein Coding gene. Diseases associated with C7orf25 include Neuronopathy, Distal Hereditary Motor, Autosomal Recessive 1 and Autosomal Recessive Distal Hereditary Motor Neuronopathy.	wasn't given	BAB15019.1	3e-37	C7orf25
													4.65774e-06	-26.5625	87400900
107	NW_024609879.1	100518810	100732409	plus	LOC121837827	121837827	protein-coding	XM_042293654.1	XP_042149588.1	B7PJN0	lipase 3-like	248	0.00037304	-27.1424	100608420	9	lipase A, lysosomal acid type [Homo sapiens]	n/a	n/a	n/a	KAI2556590.1	3e-45	no gene
													8.52157e-06	-30.9133	100608432
													4.2875e-05	-29.0513	100608435
													4.56715e-05	-27.8457	100608438
													2.98584e-05	-29.0301	100608458
													0.000292893	-27.4908	100608482
													0.00027716	-26.036	100608502
													0.00254248	-27.0235	100608522
													0.00807417	-29.1056	100681803
108	NW_024609879.1	100657759	100688464	minus	LOC120845320	120845320	protein-coding	XM_040217158.3	XP_040073092.2	B7PUZ3	BLOC-1-related complex subunit 5 isoform X1	241	0.00807417	-29.1056	100681803	1	BLOC-1-related complex subunit 5 isoform 2 [Homo sapiens]	Involved in lysosome localization and organelle transport along microtubule. Located in cytoplasmic side of lysosomal membrane and plasma membrane. Is intrinsic component of membrane. Part of BORC complex. Colocalizes with plus-end kinesin complex. [provided by Alliance of Genome Resources, Apr 2022]	BORCS5 (BLOC-1 Related Complex Subunit 5) is a Protein Coding gene. Diseases associated with BORCS5 include Polymicrogyria and Intellectual Disability-Hypoplastic Corpus Callosum-Preauricular Tag Syndrome.	As part of the BORC complex may play a role in lysosomes movement and localization at the cell periphery. Associated with the cytosolic face of lysosomes, the BORC complex may recruit ARL8B and couple lysosomes to microtubule plus-end-directed kinesin motor. Thereby, it may indirectly play a role in cell spreading and motility. ( BORC5_HUMAN,Q969J3 )	NP_001287671.1	1e-41	BORCS5
109	NW_024609879.1	104318791	104481884	minus	LOC8025429	8025429	protein-coding	XM_042293284.1	XP_042149218.1	B7P6P7	transcriptional enhancer factor TEF-1 isoform X1	361	0.00448463	-25.5072	104344015	2	transcriptional enhancer factor TEF-1 [Homo sapiens]	This gene encodes a ubiquitous transcriptional enhancer factor that is a member of the TEA/ATTS domain family. This protein directs the transactivation of a wide variety of genes and, in placental cells, also acts as a transcriptional repressor. Mutations in this gene cause Sveinsson's chorioretinal atrophy. Additional transcript variants have been described but their full-length natures have not…	TEAD1 (TEA Domain Transcription Factor 1) is a Protein Coding gene. Diseases associated with TEAD1 include Sveinsson Chorioretinal Atrophy and Soft Tissue Sarcoma. Among its related pathways are Gene expression (Transcription) and ERK Signaling. Gene Ontology (GO) annotations related to this gene include DNA-binding transcription factor activity. An important paralog of this gene is TEAD4.	Transcription factor which plays a key role in the Hippo signaling pathway, a pathway involved in organ size control and tumor suppression by restricting proliferation and promoting apoptosis. The core of this pathway is composed of a kinase cascade wherein MST1/MST2, in complex with its regulatory protein SAV1, phosphorylates and activates LATS1/2 in complex with its regulatory protein MOB1, whi…	NP_068780	0	TEAD1
													0.0024482	-26.0731	104344017
110	NW_024609879.1	115054635	115096841	plus	LOC8037754	8037754	protein-coding	XM_029992384.4	XP_029848244.2	B7Q963	T-complex protein 11-like protein 1	532	0.000373829	-25.1177	115063730	7	T-complex protein 11-like protein 1 isoform X1 [Homo sapiens]	n/a	n/a	n/a	XP_054225274.1	1e-98	no gene
													0.000261898	-27.1029	115063769
													0.000491066	-25.4441	115063775
													0.00060737	-26.5882	115063779
													0.000367918	-27.1406	115063784
													0.00044238	-26.5217	115063794
													0.000956205	-25.3182	115063828
111	NW_024609879.1	117429352	117460636	minus	LOC115322947	115322947	protein-coding	XM_040212634.1	XP_040068568.1		venom metalloproteinase antarease-like TtrivMP_A	376	0.000106223	-25.5521	117434678	9	A disintegrin and metalloproteinase with thrombospondin motifs 10 isoform X1 [Homo sapiens]	This gene belongs to the ADAMTS (a disintegrin and metalloproteinase domain with thrombospondin type-1 motifs) family of zinc-dependent proteases. ADAMTS proteases are complex secreted enzymes containing a prometalloprotease domain of the reprolysin type attached to an ancillary domain with a highly conserved structure that includes at least one thrombospondin type 1 repeat. They have been demons…	This gene belongs to the ADAMTS (a disintegrin and metalloproteinase domain with thrombospondin type-1 motifs) family of zinc-dependent proteases. ADAMTS proteases are complex secreted enzymes containing a prometalloprotease domain of the reprolysin type attached to an ancillary domain with a highly conserved structure that includes at least one thrombospondin type 1 repeat. They have been demons…	Metalloprotease that participate in microfibrils assembly. Microfibrils are extracellular matrix components occurring independently or along with elastin in the formation of elastic tissues. ( ATS10_HUMAN,Q9H324 )	XP_054178234	5e-05	ADAMTS10
													8.14026e-06	-27.3546	117434699
													2.06318e-05	-26.7361	117434701
													7.14857e-05	-25.4715	117434707
													3.39487e-05	-26.3228	117434718
													4.43915e-05	-25.8003	117434721
													4.65354e-05	-25.2348	117434725
													1.27872e-05	-27.2156	117434727
													5.85443e-05	-25.5013	117434734
112	NW_024609880.1	1638633	1698461	plus	LOC115315757	115315757	protein-coding	XM_040214904.2	XP_040070838.1	B7PW93	ankyrin-3 isoform X2	581	0.00122574	-26.3514	1667925	8	unnamed protein product [Homo sapiens]	Predicted to be located in cytosol and nucleoplasm. [provided by Alliance of Genome Resources, Apr 2022]	ANKRD28 (Ankyrin Repeat Domain 28) is a Protein Coding gene. Diseases associated with ANKRD28 include Urethra Clear Cell Adenocarcinoma and Urethra Adenocarcinoma. Among its related pathways are Transport to the Golgi and subsequent modification and Vesicle-mediated transport. An important paralog of this gene is ANKRD44.	Putative regulatory subunit of protein phosphatase 6 (PP6) that may be involved in the recognition of phosphoprotein substrates. Involved in the PP6-mediated dephosphorylation of NFKBIE opposing its degradation in response to TNF-alpha. Selectively inhibits the phosphatase activity of PPP1C. Targets PPP1C to modulate HNRPK phosphorylation. ( ANR28_HUMAN,O15084 )	BAC86737.1	2e-34	ANKRD28
													0.00531896	-25.7808	1667932
													0.00174642	-27.1767	1667935
													4.94702e-05	-30.1055	1667944
													1.30132e-05	-33.8607	1667957
													0.00124769	-25.812	1667969
													0.00208599	-25.9186	1667975
													0.000135079	-31.1199	1667983
113	NW_024609880.1	48462518	48629343	plus	LOC8052190	8052190	protein-coding	XM_042294055.1	XP_042149989.1	B7PQH0	hemocytin	3945	4.83044e-05	-26.105	48529741	9	hCG1778314, isoform CRA_b [Homo sapiens]	n/a	n/a	n/a	EAX02429.1	1e-179	no gene
													0.000107434	-28.6163	48529748
													3.11891e-05	-29.7467	48529754
													1.72919e-05	-29.7009	48529760
													0.00010765	-25.9578	48529775
													1.75008e-05	-25.2964	48529793
													1.08383e-06	-28.0626	48529795
													1.13563e-06	-26.9249	48529823
													8.64305e-06	-26.1221	48529874
114	NW_024609880.1	117505990	117562478	plus	LOC8052793	8052793	protein-coding	XM_029972388.3	XP_029828248.1	B7PR15	unconventional myosin-Id	1007	0.00140422	-25.1648	117556629	1	myosin ID, isoform CRA_a [Homo sapiens]	Enables protein domain specific binding activity. Predicted to be involved in actin filament organization; early endosome to recycling endosome transport; and vesicle transport along actin filament. Located in extracellular exosome. [provided by Alliance of Genome Resources, Apr 2022]	MYO1D (Myosin ID) is a Protein Coding gene. Diseases associated with MYO1D include Canavan Disease and Visceral Heterotaxy. Among its related pathways are PAK Pathway and Actin Nucleation by ARP-WASP Complex. Gene Ontology (GO) annotations related to this gene include actin binding and calmodulin binding. An important paralog of this gene is MYO1G.	Unconventional myosin that functions as actin-based motor protein with ATPase activity (By similarity). Plays a role in endosomal protein trafficking, and especially in the transfer of cargo proteins from early to recycling endosomes (By similarity). Required for normal planar cell polarity in ciliated tracheal cells, for normal rotational polarity of cilia, and for coordinated, unidirectional ci…	EAW80221.1	0	MYO1D
115	NW_024609880.1	124201797	124245664	minus	LOC115311852	115311852	protein-coding	XM_042294139.1	XP_042150073.1		LOW QUALITY PROTEIN: collagen alpha-1(I) chain	1524	1.54014e-06	-45.4918	124232166	31	ZC3H13 protein [Homo sapiens]	Enables RNA binding activity. Involved in mRNA methylation. Located in nuclear speck. Part of RNA N6-methyladenosine methyltransferase complex. [provided by Alliance of Genome Resources, Apr 2022]	ZC3H13 (Zinc Finger CCCH-Type Containing 13) is a Protein Coding gene. Diseases associated with ZC3H13 include Uterine Corpus Endometrial Carcinoma and Wilms Tumor 1. Gene Ontology (GO) annotations related to this gene include RNA binding.	Associated component of the WMM complex, a complex that mediates N6-methyladenosine (m6A) methylation of RNAs, a modification that plays a role in the efficiency of mRNA splicing and RNA processing (PubMed:29507755). Acts as a key regulator of m6A methylation by promoting m6A methylation of mRNAs at the 3'-UTR (By similarity). Controls embryonic stem cells (ESCs) pluripotency via its role in m6A …	AAH19000.1	3e-20	ZC3H13
													2.20161e-06	-42.372	124232181
													1.6632e-05	-37.9515	124232188
													3.15843e-09	-41.1278	124232238
													4.52021e-11	-43.4354	124232241
													1.30833e-13	-44.9854	124232254
													1.11129e-11	-41.815	124232258
													2.39935e-12	-43.2051	124232260
													4.20378e-15	-44.7317	124232276
													2.47534e-13	-41.5576	124232287
													6.06226e-17	-46.7298	124232292
													1.09637e-13	-42.0642	124232297
													0.00726763	-27.7922	124232298
													8.29443e-10	-36.6307	124232299
													0.000428371	-35.4945	124232300
													5.53455e-09	-35.696	124232340
													0.00479377	-25.873	124232341
													6.22801e-12	-40.5211	124232352
													5.78237e-06	-33.7593	124232353
													3.89996e-07	-34.1901	124232402
													1.88655e-07	-35.6504	124232406
													0.000629439	-27.5892	124232407
													1.65726e-05	-30.7712	124232413
													8.54974e-05	-31.6327	124232414
													3.99157e-10	-42.6526	124232418
													5.27859e-05	-31.9639	124232419
													1.12251e-06	-37.2656	124232447
													2.60044e-05	-33.4071	124232452
													1.11519e-05	-36.5642	124232463
													0.00132432	-29.1991	124232467
													0.00723903	-27.7553	124232480
116	NW_024609880.1	126874401	127006349	plus	LOC8052649	8052649	protein-coding	XM_040218692.2	XP_040074626.1		bcl-2-related ovarian killer protein	281	2.2429e-14	-55.2217	126934189	6	bcl-2-related ovarian killer protein [Homo sapiens] (apoptosis)	The protein encoded by this gene belongs to the BCL2 family, members of which form homo- or heterodimers, and act as anti- or proapoptotic regulators that are involved in a wide variety of cellular processes. Studies in rat show that this protein has restricted expression in reproductive tissues, interacts strongly with some antiapoptotic BCL2 proteins, not at all with proapoptotic BCL2 proteins,…	BOK (BCL2 Family Apoptosis Regulator BOK) is a Protein Coding gene. Diseases associated with BOK include Myelodysplastic Syndrome and Ovarian Cancer. Among its related pathways are TNFR1 Pathway and Apoptosis and Autophagy. Gene Ontology (GO) annotations related to this gene include protein homodimerization activity and protein dimerization activity. An important paralog of this gene is BCL2L1.	[Isoform 1]: Apoptosis regulator that functions through different apoptotic signaling pathways (PubMed:15102863, 20673843, 27076518). Plays a roles as pro-apoptotic protein that positively regulates intrinsic apoptotic process in a BAX- and BAK1-dependent manner or in a BAX- and BAK1-independent manner (PubMed:15102863, 27076518). In response to endoplasmic reticulum stress promotes mitochondrial…	NP_115904.1	4e-23	BOK
													3.25802e-10	-47.4951	126934207
													2.1389e-10	-48.6163	126934213
													1.80202e-10	-48.9586	126934223
													1.02872e-09	-48.0608	126934234
													2.23052e-09	-49.1951	126934244
117	NW_024609881.1	1525841	1564207	minus	LOC121838383	121838383	protein-coding	XM_042294589.1	XP_042150523.1		dihydrofolate reductase-like	193	1.26914e-05	-29.8753	1562350	2	Chain A, Dihydrofolate reductase [Homo sapiens]	n/a	n/a	n/a	3F91_A	4e-46	no gene
													0.000234373	-26.0442	1562415
118	NW_024609881.1	8148683	8523273	minus	LOC8026835	8026835	protein-coding	XM_029967180.4	XP_029823040.2		DNA-dependent protein kinase catalytic subunit	3934	0.00868125	-25.2035	8247670	33	Chain A, DNA-dependent protein kinase catalytic subunit,DNA-PKcs,DNA-PKcs [Homo sapiens]	n/a	n/a	n/a	6ZFP_A	0	no gene
													1.16951e-16	-59.1889	8281044
													5.85204e-11	-53.2286	8281105
													2.37848e-15	-58.6948	8281121
													5.43325e-14	-57.5901	8281132
													3.09476e-14	-56.4122	8281135
													3.33157e-14	-54.7238	8281144
													2.74773e-21	-64.0621	8281161
													5.69547e-14	-53.0188	8281164
													3.3549e-20	-61.8837	8281186
													2.77074e-20	-64.0954	8281194
													4.27118e-20	-65.8567	8281203
													3.0002e-17	-62.4469	8281207
													3.03701e-19	-65.2299	8281211
													6.96321e-21	-67.2808	8281214
													7.64418e-10	-51.5083	8281221
													8.36961e-14	-59.5556	8281224
													2.19004e-05	-29.5499	8462883
													7.72774e-07	-33.3737	8462892
													1.35919e-08	-37.0486	8462904
													2.91209e-07	-35.2952	8462907
													1.98065e-11	-40.3562	8462914
													2.00014e-10	-41.3836	8462917
													1.15166e-08	-36.7876	8462921
													1.82738e-11	-40.801	8462925
													4.99357e-09	-35.731	8462934
													1.88026e-07	-34.7619	8462942
													2.4767e-08	-40.1746	8462961
													1.88273e-10	-44.1368	8462964
													2.7682e-12	-44.4322	8462967
													3.21825e-09	-45.6456	8462984
													4.42872e-07	-41.4417	8462993
													1.16605e-07	-45.5117	8462996
119	NW_024609881.1	8823377	9085808	plus	LOC8042239	8042239	protein-coding	XM_029971129.3	XP_029826989.2	B7QJN0	meiosis regulator and mRNA stability factor 1 isoform X2	1227	4.05605e-08	-50.1984	8888872	22	meiosis regulator and mRNA stability factor 1 isoform X20 [Homo sapiens]	n/a	n/a	n/a	XP_047290909.1	4e-83	no gene
													0.00108136	-32.26	8888888
													1.11072e-06	-43.5227	8888890
													0.00116024	-31.0278	8888900
													3.64395e-07	-40.9517	8889117
													1.74983e-07	-40.0756	8889137
													7.84498e-08	-42.0696	8889141
													4.02372e-07	-39.1903	8889153
													2.58164e-05	-31.2524	8889165
													0.00149542	-31.7065	8891077
													0.00645167	-28.1106	8891082
													0.0021758	-30.9677	8891086
													0.0021862	-30.6192	8891090
													0.000838237	-30.4653	8891140
													1.95878e-05	-37.7059	8891149
													0.00105112	-30.4378	8891154
													0.000182794	-34.5487	8891159
													4.99243e-05	-36.388	8891173
													0.000425923	-33.1378	8891179
													0.00927464	-26.5723	8894074
													0.00111533	-27.6772	8948358
													0.00222909	-25.6609	8948415
120	NW_024609881.1	24398637	24419750	minus	LOC115328785	115328785	protein-coding	XM_029990184.3	XP_029846044.2	B7PPW0	zinc finger protein OZF-like	396	0.00189807	-30.2791	24402564	1	ZFP2 protein [Homo sapiens]	Predicted to enable DNA-binding transcription factor activity, RNA polymerase II-specific and RNA polymerase II cis-regulatory region sequence-specific DNA binding activity. Predicted to be involved in regulation of transcription by RNA polymerase II. Predicted to be located in nucleus. [provided by Alliance of Genome Resources, Apr 2022]	ZFP2 (ZFP2 Zinc Finger Protein) is a Protein Coding gene. Among its related pathways is Gene expression (Transcription). Gene Ontology (GO) annotations related to this gene include DNA-binding transcription factor activity. An important paralog of this gene is ZNF71.	Probable transcription factor involved in neuronal differentiation and/or phenotypic maintenance. ( ZFP2_HUMAN,Q6ZN57 )	AAI44214.1	2e-110	ZFP2
121	NW_024609881.1	24475259	24521687	plus	LOC115328786	115328786	protein-coding	XM_040217705.3	XP_040073639.1	B7PPW0	zinc finger protein OZF-like	487	0.000775205	-30.7165	24483772	6	zinc finger protein 420 isoform d [Homo sapiens]	The protein encoded by this gene is a KRAB-type zinc finger protein that negatively-regulates p53-mediated apoptosis. Under stress conditions, the encoded protein is phosphorylated by ATM and dissociates from p53, which activates p53 and initiates apoptosis. [provided by RefSeq, Jul 2016]	ZNF420 (Zinc Finger Protein 420) is a Protein Coding gene. Among its related pathways are Gene expression (Transcription) and TP53 Regulates Transcription of Cell Death Genes. Gene Ontology (GO) annotations related to this gene include nucleic acid binding and DNA-binding transcription factor activity. An important paralog of this gene is ZNF91.	May be involved in transcriptional regulation. ( ZN420_HUMAN,Q8TAQ5 )	NP_001316446.1	3e-150
													0.00038831	-31.9484	24483780
													0.000330358	-31.8841	24483788
													0.00271558	-28.3846	24483797
													0.00117901	-29.7083	24483805
													0.00211891	-25.5645	24491152
122	NW_024609881.1	42395885	42693273	minus	LOC8039626	8039626	protein-coding	XM_040210496.1	XP_040066430.1	B7PWF1	MAM and LDL-receptor class A domain-containing protein 2	2890	0.0013701	-25.8275	42431136	1	MAM domain containing 4 [Homo sapiens]	n/a	n/a	n/a	KAI2554677.1	1e-81	no gene
123	NW_024609881.1	69023195	69049563	plus	LOC8038816	8038816	protein-coding	XM_029977608.4	XP_029833468.1		WD repeat domain phosphoinositide-interacting protein 3	346	0.00113086	-29.2308	69047385	4	WD repeat domain phosphoinositide-interacting protein 3 [Homo sapiens]	This gene encodes a member of the WIPI or SVP1 family of WD40 repeat-containing proteins. The protein contains seven WD40 repeats that are thought to fold into a beta-propeller structure that mediates protein-protein interactions, and a conserved motif for interaction with phospholipids. The human genome contains several pseudogenes of this gene. [provided by RefSeq, Jul 2008]	WDR45B (WD Repeat Domain 45B) is a Protein Coding gene. Diseases associated with WDR45B include Neurodevelopmental Disorder With Spastic Quadriplegia And Brain Abnormalities With Or Without Seizures and Quadriplegia. Among its related pathways is Selective autophagy. Gene Ontology (GO) annotations related to this gene include phosphatidylinositol-3-phosphate binding and phosphatidylinositol-3,5-b…	Component of the autophagy machinery that controls the major intracellular degradation process by which cytoplasmic materials are packaged into autophagosomes and delivered to lysosomes for degradation (PubMed:28561066). Binds phosphatidylinositol 3-phosphate (PtdIns3P), and other phosphoinositides including PtdIns(3,5)P2, forming on membranes of the endoplasmic reticulum upon activation of the u…	NP_062559.2	0	WDR45B
													1.33886e-06	-39.1608	69047405
													0.00225496	-26.4569	69047410
													0.00132107	-27.2162	69047426
124	NW_024609881.1	89835882	89875971	plus	LOC8028604	8028604	protein-coding	XM_042294848.1	XP_042150782.1	B7PE87	uncharacterized protein LOC8028604	909	3.6426e-05	-29.0783	89862686	4	RCC1 and BTB domain-containing protein 2 isoform 4 [Homo sapiens]	This gene encodes a protein containing two C-terminal BTB/POZ domains that is related to regulator of chromosome condensation (RCC). The encoded protein may act as a guanine nucleotide exchange factor. This gene is observed to be lost or underexpressed in prostate cancers. There is a pseudogene of this gene on chromosome 10. Alternative splicing results in multiple transcript variants. [provided …	RCBTB2 (RCC1 And BTB Domain Containing Protein 2) is a Protein Coding gene. Diseases associated with RCBTB2 include Spindle Cell Liposarcoma and Pleomorphic Lipoma. Gene Ontology (GO) annotations related to this gene include guanyl-nucleotide exchange factor activity. An important paralog of this gene is RCBTB1.	not given	NP_001273761.1	8e-10	RCBTB2
													0.000321933	-25.741	89862695
													0.00016206	-26.4474	89862705
													0.000210917	-25.5642	89862709
125	NW_024609881.1	123357413	123424581	plus	LOC8052677	8052677	protein-coding	XM_040215445.3	XP_040071379.1	B7Q370	calcium-binding protein E63-1 isoform X1	186	2.69448e-05	-32.1349	123377532	25	Chain A, Calmodulin-1 [Homo sapiens]	n/a	n/a	n/a	6U3D_A	8e-33	no gene
													3.4813e-08	-38.3333	123377545
													4.49568e-05	-30.6826	123377553
													1.00421e-07	-37.706	123377589
													3.41277e-06	-36.3268	123377593
													3.02103e-10	-44.3714	123377619
													9.98447e-11	-47.1721	123377627
													2.39295e-10	-44.9981	123377639
													2.18969e-09	-41.676	123377649
													5.9912e-07	-39.7124	123377679
													3.86454e-08	-43.1192	123377687
													2.56724e-10	-49.1966	123377700
													1.65505e-07	-42.5943	123377704
													1.84857e-05	-32.3839	123377826
													3.93123e-07	-34.425	123377863
													7.52001e-09	-36.8151	123377868
													4.90864e-11	-39.838	123377885
													7.6391e-13	-46.9473	123377922
													1.30434e-10	-38.2353	123377936
													4.20356e-13	-48.75	123377939
													1.61615e-11	-49.077	123377959
													2.61593e-13	-51.7528	123378009
													3.52362e-07	-39.2227	123378018
													5.67251e-09	-45.2206	123378022
													2.27383e-08	-45.1885	123378031
126	NW_024609882.1	16276948	16289507	minus	LOC115320057	115320057	protein-coding	XM_029980141.4	XP_029836001.2	B7PBW3	protein disulfide-isomerase A6 homolog	435	0.00011014	-32.9327	16281048	1	protein disulfide-isomerase A6 isoform e precursor [Homo sapiens]	This gene encodes a member of the disulfide isomerase (PDI) family of endoplasmic reticulum (ER) proteins that catalyze protein folding and thiol-disulfide interchange reactions. The encoded protein has an N-terminal ER-signal sequence, two catalytically active thioredoxin (TRX) domains, a TRX-like domain, and a C-terminal ER-retention sequence. This protein inhibits the aggregation of misfolded …	PDIA6 (Protein Disulfide Isomerase Family A Member 6) is a Protein Coding gene. Diseases associated with PDIA6 include Glioblastoma and Cystic Fibrosis. Among its related pathways are Unfolded Protein Response (UPR) and Cellular responses to stimuli. Gene Ontology (GO) annotations related to this gene include isomerase activity and protein disulfide isomerase activity. An important paralog of thi…	May function as a chaperone that inhibits aggregation of misfolded proteins (PubMed:12204115). Negatively regulates the unfolded protein response (UPR) through binding to UPR sensors such as ERN1, which in turn inactivates ERN1 signaling (PubMed:24508390). May also regulate the UPR via the EIF2AK3 UPR sensor (PubMed:24508390). Plays a role in platelet aggregation and activation by agonists such a…	NP_001269636.1	5e-173	PDIA6
127	NW_024609882.1	16947371	16986072	plus	LOC8032860	8032860	protein-coding	XM_029986687.3	XP_029842547.1		synembryn-A	589	0.000234296	-29.1913	16965044	3	synembryn-A isoform 2 [Homo sapiens]	Predicted to enable G-protein alpha-subunit binding activity; GTPase activator activity; and guanyl-nucleotide exchange factor activity. Predicted to be involved in G protein-coupled receptor signaling pathway. Predicted to act upstream of or within several processes, including basement membrane organization; gastrulation; and visual learning. Predicted to be located in membrane. Predicted to be …	RIC8A (RIC8 Guanine Nucleotide Exchange Factor A) is a Protein Coding gene. Diseases associated with RIC8A include Chronic Maxillary Sinusitis and Fragile X Syndrome. Gene Ontology (GO) annotations related to this gene include binding and guanyl-nucleotide exchange factor activity. An important paralog of this gene is RIC8B.	Guanine nucleotide exchange factor (GEF), which can activate some, but not all, G-alpha proteins. Able to activate GNAI1, GNAO1 and GNAQ, but not GNAS by exchanging bound GDP for free GTP. Involved in regulation of microtubule pulling forces during mitotic movement of chromosomes by stimulating G(i)-alpha protein, possibly leading to release G(i)-alpha-GTP and NuMA proteins from the NuMA-GPSM2-G(…	NP_001273063.1	1e-93	RIC8A
													4.82705e-06	-33.1512	16965047
													1.71938e-06	-34.2125	16965066
128	NW_024609882.1	48334998	48567732	minus	LOC8027808	8027808	protein-coding	XM_042286222.1	XP_042142156.1	B7QNJ6	Down syndrome cell adhesion molecule homolog	1391	0.000200355	-32.2584	48454154	3	Down syndrome cell adhesion molecule DSCAML1 [Homo sapiens]	The protein encoded by this gene is a member of the Ig superfamily of cell adhesion molecules and is involved in neuronal differentiation. The encoded membrane-bound protein localizes to the cell surface, where it forms aggregates that repel neuronal processes of the same cell type. [provided by RefSeq, Sep 2016]	DSCAML1 (DS Cell Adhesion Molecule Like 1) is a Protein Coding gene. Diseases associated with DSCAML1 include Bardet-Biedl Syndrome 18 and Prostate Cancer. Among its related pathways are Nervous system development and Netrin-1 signaling. Gene Ontology (GO) annotations related to this gene include protein homodimerization activity. An important paralog of this gene is DSCAM.	Cell adhesion molecule that plays a role in neuronal self-avoidance (PubMed:11453658). Promotes repulsion between specific neuronal processes of either the same cell or the same subtype of cells. Promotes both isoneuronal self-avoidance for creating an orderly neurite arborization in retinal rod bipolar cells and heteroneuronal self-avoidance to maintain mosaic spacing between AII amacrine cells …	AAL57166.1	0	DSCAML1
													0.00951102	-25.1429	48454198
													3.56526e-05	-36.671	48454208
129	NW_024609882.1	88630972	88666833	plus	LOC8043966	8043966	protein-coding	XM_029966146.3	XP_029822006.2	B7QNL4	mitochondrial inner membrane protease subunit 1 isoform X1	155	0.00535909	-28.0084	88655515	1	mitochondrial inner membrane protease subunit 1 [Homo sapiens]	The mitochondrial inner membrane peptidase (IMP) complex generates mature, active proteins in the mitochondrial intermembrane space by proteolytically removing the mitochondrial targeting presequence of nuclear-encoded proteins. IMP1 and IMP2 (IMMP2L; MIM 605977) are the catalytic subunits of the IMP complex (Burri et al., 2005 [PubMed 15814844]).[supplied by OMIM, Sep 2008]	IMMP1L (Inner Mitochondrial Membrane Peptidase Subunit 1) is a Protein Coding gene. Diseases associated with IMMP1L include Gillespie Syndrome and Wilms Tumor, Aniridia, Genitourinary Anomalies, And Impaired Intellectual Development Syndrome. Gene Ontology (GO) annotations related to this gene include serine-type peptidase activity. An important paralog of this gene is IMMP2L.	Catalyzes the removal of transit peptides required for the targeting of proteins from the mitochondrial matrix, across the inner membrane, into the inter-membrane space. Known to process the nuclear encoded protein DIABLO. ( IMP1L_HUMAN,Q96LU5 )	NP_001291203.1	9e-51	IMMP1L
130	NW_024609882.1	90022399	90144271	plus	LOC8024924	8024924	protein-coding	XM_040211030.3	XP_040066964.1	B7P5I7	LARGE xylosyl- and glucuronyltransferase 1	738	0.000209197	-29.7863	90135934	2	LARGE xylosyl- and glucuronyltransferase 1 [Homo sapiens]	n/a	n/a	n/a	KAI2597510.1	0	no gene
													0.000370064	-28.6943	90135964
131	NW_024609882.1	97667418	97825193	plus	LOC115323621	115323621	protein-coding	XM_040212497.2	XP_040068431.1		C2 domain-containing protein 5 isoform X1	949	1.29993e-05	-28.2448	97780646	4	C2 domain-containing protein 5 isoform e [Homo sapiens]	Enables calcium ion binding activity and calcium-dependent phospholipid binding activity. Involved in cellular response to insulin stimulus; intracellular protein transmembrane transport; and positive regulation of transport. Located in several cellular components, including centriolar satellite; cytoplasmic vesicle membrane; and ruffle membrane. [provided by Alliance of Genome Resources, Apr 202…	C2CD5 (C2 Calcium Dependent Domain Containing 5) is a Protein Coding gene. Diseases associated with C2CD5 include Protoplasmic Astrocytoma. Among its related pathways are Vesicle-mediated transport and Activation of AMPK downstream of NMDARs. Gene Ontology (GO) annotations related to this gene include calcium ion binding and calcium-dependent phospholipid binding.	Required for insulin-stimulated glucose transport and glucose transporter SLC2A4/GLUT4 translocation from intracellular glucose storage vesicle (GSV) to the plasma membrane (PM) in adipocytes. Binds phospholipid membranes in a calcium-dependent manner and is necessary for the optimal membrane fusion between SLC2A4/GLUT4 GSV and the PM. ( C2CD5_HUMAN,Q86YS7 )	NP_055617.1	0	C2CD5
													3.30961e-06	-30.6122	97780728
													6.46851e-05	-28.6788	97780732
													0.000253311	-25.8838	97780738
132	NW_024609882.1	105140293	105141870	minus	LOC120841634	120841634	protein-coding	XM_042286331.1	XP_042142265.1		uncharacterized protein LOC120841634	525	9.80863e-05	-30.5705	105141144	12	KIAA0304 protein [Homo sapiens]	This gene encodes a protein which contains multiple domains including a CXXC zinc finger, three PHD zinc fingers, two FY-rich domains, and a SET (suppressor of variegation, enhancer of zeste, and trithorax) domain. The SET domain is a conserved C-terminal domain that characterizes proteins of the MLL (mixed-lineage leukemia) family. This gene is ubiquitously expressed in adult tissues. It is also…	KMT2B (Lysine Methyltransferase 2B) is a Protein Coding gene. Diseases associated with KMT2B include Intellectual Developmental Disorder, Autosomal Dominant 68 and Dystonia 28, Childhood-Onset. Among its related pathways are Gene expression (Transcription) and PKMTs methylate histone lysines. Gene Ontology (GO) annotations related to this gene include DNA-binding transcription factor activity and…	Histone methyltransferase that catalyzes methyl group transfer from S-adenosyl-L-methionine to the epsilon-amino group of 'Lys-4' of histone H3 (H3K4) via a non-processive mechanism. Part of chromatin remodeling machinery predominantly forms H3K4me1 and H3K4me2 methylation marks at active chromatin sites where transcription and DNA repair take place (PubMed:17707229, 25561738). Likely plays a red…	BAA20763.3	0.0007	KMT2B
													4.42618e-05	-26.087	105141184
													3.93299e-06	-26.6667	105141196
													3.32269e-10	-30.5657	105141316
													3.66053e-08	-27.1009	105141319
													7.28629e-07	-25.1401	105141324
													3.59014e-08	-30.0501	105141344
													3.75978e-06	-25.5183	105141349
													4.41878e-08	-32.75	105141373
													7.59492e-05	-25.202	105141421
													1.558e-09	-27.5986	105141538
													1.8741e-05	-25.3012	105141628
133	NW_024609883.1	7066083	7197388	plus	LOC115309859	115309859	protein-coding	XM_029968111.4	XP_029823971.1	B7QDE2	venom phosphodiesterase 2 isoform X2	710	2.09165e-05	-31.4659	7152437	9	ectonucleotide pyrophosphatase/phosphodiesterase family member 1 [Homo sapiens]	This gene is a member of the ecto-nucleotide pyrophosphatase/phosphodiesterase (ENPP) family. The encoded protein is a type II transmembrane glycoprotein comprising two identical disulfide-bonded subunits. This protein has broad specificity and cleaves a variety of substrates, including phosphodiester bonds of nucleotides and nucleotide sugars and pyrophosphate bonds of nucleotides and nucleotide…	ENPP1 (Ectonucleotide Pyrophosphatase/Phosphodiesterase 1) is a Protein Coding gene. Diseases associated with ENPP1 include Cole Disease and Hypophosphatemic Rickets, Autosomal Recessive, 2. Among its related pathways are Metabolism of water-soluble vitamins and cofactors and Endochondral ossification with skeletal dysplasias. Gene Ontology (GO) annotations related to this gene include nucleic ac…	Nucleotide pyrophosphatase that generates diphosphate (PPi) and functions in bone mineralization and soft tissue calcification by regulating pyrophosphate levels (By similarity). PPi inhibits bone mineralization and soft tissue calcification by binding to nascent hydroxyapatite crystals, thereby preventing further growth of these crystals (PubMed:11004006). Preferentially hydrolyzes ATP, but can …	WEA82139.1	3e-145	ENPP1
													3.83386e-07	-37.3708	7152451
													1.89559e-06	-36.1856	7152464
													2.18583e-06	-37.2122	7152476
													6.21954e-05	-32.7183	7152481
													0.0041465	-26.0091	7158809
													0.00018498	-29.9041	7158820
													0.000250066	-28.2546	7158848
													5.61116e-06	-31.8971	7158899
134	NW_024609883.1	9776628	9809960	minus	LOC8041289	8041289	protein-coding	XM_029994020.4	XP_029849880.2	B7QHE6	lysosomal-associated transmembrane protein 4A isoform X1	266	0.000318264	-28.4058	9800602	3	Lysosomal protein transmembrane 4 alpha [Homo sapiens]	This gene encodes a protein that has four predicted transmembrane domains. The function of this gene has not yet been determined; however, studies in the mouse homolog suggest a role in the transport of small molecules across endosomal and lysosomal membranes. [provided by RefSeq, Jul 2008]	LAPTM4A (Lysosomal Protein Transmembrane 4 Alpha) is a Protein Coding gene. Diseases associated with LAPTM4A include Myofascial Pain Syndrome and Patellofemoral Pain Syndrome. An important paralog of this gene is LAPTM4B.	May function in the transport of nucleosides and/or nucleoside derivatives between the cytosol and the lumen of an intracellular membrane-bound compartment. ( LAP4A_HUMAN,Q15012 )	AAH03158.1	2e-31	LAPTM4A
													0.00139301	-25.4066	9800655
													0.000673358	-26.1858	9800692
135	NW_024609883.1	9945641	9982617	plus	LOC115329942	115329942	protein-coding	XM_029991617.4	XP_029847477.1	B7PEN0	tRNA selenocysteine 1-associated protein 1	226	9.03502e-07	-34.353	9970179	2	tRNA selenocysteine 1-associated protein 1 [Homo sapiens]	Enables RNA binding activity. Predicted to be involved in selenocysteine incorporation. Predicted to be located in cytoplasm. Predicted to be active in nucleus. [provided by Alliance of Genome Resources, Apr 2022]	TRNAU1AP (TRNA Selenocysteine 1 Associated Protein 1) is a Protein Coding gene. Diseases associated with TRNAU1AP include Combined D-2- And L-2-Hydroxyglutaric Aciduria. Among its related pathways is Selenium Metabolism and Selenoproteins. Gene Ontology (GO) annotations related to this gene include nucleic acid binding and nucleotide binding. An important paralog of this gene is TIA1.	Involved in the early steps of selenocysteine biosynthesis and tRNA(Sec) charging to the later steps resulting in the cotranslational incorporation of selenocysteine into selenoproteins. Stabilizes the SECISBP2, EEFSEC and tRNA(Sec) complex. May be involved in the methylation of tRNA(Sec). Enhances efficiency of selenoproteins synthesis (By similarity). ( TSAP1_HUMAN,Q9NX07 )	NP_060316.1	2e-58	TRNAU1AP
													9.29896e-06	-40.4794	9979649
136	NW_024609883.1	10422734	10616436	plus	LOC115322654	115322654	protein-coding	XM_029983004.4	XP_029838864.2		histone-lysine N-methyltransferase SUV39H2 isoform X1	535	5.11155e-08	-45.4307	10571133	7	hypothetical protein [Homo sapiens]	Enables S-adenosyl-L-methionine binding activity; histone methyltransferase activity (H3-K9 specific); and zinc ion binding activity. Involved in chromatin assembly or disassembly and chromatin remodeling. Acts upstream of or within cellular response to hypoxia and negative regulation of transcription by RNA polymerase II. Located in chromatin. [provided by Alliance of Genome Resources, Apr 2022]	SUV39H2 (SUV39H2 Histone Lysine Methyltransferase) is a Protein Coding gene. Diseases associated with SUV39H2 include Hyperoxaluria, Primary, Type I and Primary Hyperoxaluria. Among its related pathways are PKMTs methylate histone lysines and Chromatin organization. Gene Ontology (GO) annotations related to this gene include chromatin binding and transcription cis-regulatory region binding. An im…	Histone methyltransferase that specifically trimethylates 'Lys-9' of histone H3 using monomethylated H3 'Lys-9' as substrate. H3 'Lys-9' trimethylation represents a specific tag for epigenetic transcriptional repression by recruiting HP1 (CBX1, CBX3 and/or CBX5) proteins to methylated histones. Mainly functions in heterochromatin regions, thereby playing a central role in the establishment of con…	CAD39146.1	8e-92	SUV39H2
													3.03796e-08	-44.6662	10571143
													5.19011e-09	-44.875	10571148
													1.12337e-09	-46.9243	10571166
													5.21251e-08	-43.0683	10571171
													2.71551e-08	-45.5974	10571184
													5.12297e-07	-40.9153	10571186
137	NW_024609883.1	34556226	34630729	minus	LOC8052594	8052594	protein-coding	XM_042286951.1	XP_042142885.1		serine/threonine-protein kinase haspin homolog	600	5.77641e-07	-36.6061	34580825	3	Chain A, Serine/threonine-protein kinase haspin [Homo sapiens]	n/a	n/a	n/a	6G3A_A	1e-26	no gene
													3.79344e-06	-34.4646	34580834
													5.07013e-05	-31.1765	34580840
138	NW_024609883.1	52452222	52513023	plus	LOC8039067	8039067	protein-coding	XM_042286672.1	XP_042142606.1	B7QC82	bromodomain-containing protein 1 isoform X1	1280	0.0068284	-27.398	52495530	2	peregrin isoform X7 [Homo sapiens]	This gene encodes a bromodomain, PHD finger and chromo/Tudor-related Pro-Trp-Trp-Pro (PWWP) domain containing protein. The encoded protein is a component of the MOZ/MORF histone acetyltransferase complexes which function as a transcriptional regulators. This protein binds to the catalytic MYST domains of the MOZ and MORF proteins and may play a role in stimulating acetyltransferase and transcript…	BRPF1 (Bromodomain And PHD Finger Containing 1) is a Protein Coding gene. Diseases associated with BRPF1 include Intellectual Developmental Disorder With Dysmorphic Facies And Ptosis and Alacrima, Achalasia, And Impaired Intellectual Development Syndrome. Among its related pathways are Gene expression (Transcription) and Chromatin organization. An important paralog of this gene is BRPF3.	Scaffold subunit of various histone acetyltransferase (HAT) complexes, such as the MOZ/MORF and HBO1 complexes, which have a histone H3 acetyltransferase activity (PubMed:16387653, 24065767, 27939640). Plays a key role in HBO1 complex by directing KAT7/HBO1 specificity towards histone H3 'Lys-14' acetylation (H3K14ac) (PubMed:24065767). Some HAT complexes preferentially mediate histone H3 'Lys-23…	XP_047304837.1	0	BRPF1
													0.00232452	-29.6834	52495548
139	NW_024609883.1	54359197	54394126	minus	LOC115322053	115322053	protein-coding	XM_029982388.3	XP_029838248.1		NADH dehydrogenase [ubiquinone] 1 alpha subcomplex subunit 5	117	1.53873e-06	-32.8862	54381707	26	NADH dehydrogenase (ubiquinone) 1 alpha subcomplex, 5, 13kDa [Homo sapiens]	This nuclear gene encodes a conserved protein that comprises the B13 subunit of complex I of the mitochondrial respiratory chain. The encoded protein localizes to the inner mitochondrial membrane, where it is thought to aid in the transfer of electrons from NADH to ubiquinone. Alternative splicing results in multiple transcript variants. There are numerous pseudogenes of this gene on chromosomes …	NDUFA5 (NADH:Ubiquinone Oxidoreductase Subunit A5) is a Protein Coding gene. Diseases associated with NDUFA5 include Mitochondrial Disease and Endobronchial Leiomyoma. Among its related pathways are Signaling by Rho GTPases and Complex I biogenesis. Gene Ontology (GO) annotations related to this gene include NADH dehydrogenase (ubiquinone) activity and oxidoreductase activity, acting on NAD(P)H.	Accessory subunit of the mitochondrial membrane respiratory chain NADH dehydrogenase (Complex I), that is believed not to be involved in catalysis. Complex I functions in the transfer of electrons from NADH to the respiratory chain. The immediate electron acceptor for the enzyme is believed to be ubiquinone. ( NDUA5_HUMAN,Q16718 )	AAH70236.1	4e-49	NDUFA5
													2.95005e-06	-30.8502	54381711
													9.55817e-06	-29.902	54381713
													2.47192e-06	-30.0234	54381720
													9.20209e-10	-37.2052	54381723
													7.50374e-10	-37.2642	54381732
													8.6468e-09	-35.204	54381743
													4.57325e-09	-35.8843	54381745
													1.67347e-07	-32.8521	54381747
													7.80198e-10	-35.7792	54381750
													1.08458e-09	-36.6636	54381753
													1.15198e-07	-32.8653	54381755
													3.56381e-08	-33.9163	54381760
													1.44993e-08	-33.8814	54381763
													1.4711e-07	-33.4716	54381766
													6.51977e-05	-25.254	54381769
													1.25079e-08	-35.5198	54381773
													2.83129e-09	-36.1985	54381780
													4.59573e-09	-36.3309	54381787
													2.26942e-09	-36.5358	54381791
													3.34829e-09	-37.4569	54381794
													5.93196e-09	-37.2826	54381802
													1.26267e-08	-37.2045	54381804
													1.30791e-08	-37.8788	54381814
													2.72019e-08	-38.4924	54381817
													2.51317e-06	-35.2206	54381820
140	NW_024609883.1	60488493	60586205	plus	LOC8032085	8032085	protein-coding	XM_029986846.4	XP_029842706.2		HEAT repeat-containing protein 1	2066	0.00201547	-26.8916	60517021	8	HEAT repeat containing 1 [Homo sapiens]	Enables RNA binding activity. Involved in positive regulation of rRNA processing and positive regulation of transcription by RNA polymerase I. Located in fibrillar center and mitochondrion. Implicated in pancreatic ductal carcinoma. Biomarker of glioblastoma. [provided by Alliance of Genome Resources, Apr 2022]	HEATR1 (HEAT Repeat Containing 1) is a Protein Coding gene. Diseases associated with HEATR1 include Pancreatic Ductal Carcinoma and Diamond-Blackfan Anemia. Among its related pathways are rRNA processing in the nucleus and cytosol and Processing of Capped Intron-Containing Pre-mRNA. Gene Ontology (GO) annotations related to this gene include RNA binding and snoRNA binding.	Ribosome biogenesis factor. Involved in nucleolar processing of pre-18S ribosomal RNA. Required for optimal pre-ribosomal RNA transcription by RNA polymerase I (PubMed:17699751). Part of the small subunit (SSU) processome, first precursor of the small eukaryotic ribosomal subunit. During the assembly of the SSU processome in the nucleolus, many ribosome biogenesis factors, an RNA chaperone and ri…	AAI50615.1	0	HEATR1
													1.70352e-05	-28.8545	60517036
													7.49133e-05	-26.5842	60517038
													4.77332e-05	-27.4242	60517040
													2.50689e-06	-25.0486	60517099
													4.64194e-08	-28.5854	60517102
													3.12236e-07	-27.3816	60517141
													1.73012e-07	-28.7282	60517164
141	NW_024609883.1	61370359	61391228	plus	LOC8033015	8033015	protein-coding	XM_040210692.3	XP_040066626.3		uncharacterized protein LOC8033015	339	0.000122045	-29.2334	61382627	4	no significant similarity found	n/a	n/a	n/a	n/a	n/a	n/a
													0.000442182	-26.6938	61382647
													4.14792e-05	-30.8088	61382670
													0.000228471	-27.2764	61382678
142	NW_024609883.1	65460525	65529891	plus	LOC115329991	115329991	protein-coding	XM_029991705.3	XP_029847565.1	B7PZ89	DDB1- and CUL4-associated factor 1 isoform X3	1456	0.00036528	-31.1727	65497288	17	Chain B, DDB1- and CUL4-associated factor 1 [Homo sapiens]	n/a	n/a	n/a	7OKQ_B	0	no gene
													1.07265e-05	-35.4149	65497296
													0.000399699	-29.1186	65497302
													0.000647542	-28.1593	65497305
													7.30176e-05	-29.7098	65497315
													8.62473e-05	-28.1599	65497321
													0.000226669	-25.4641	65497338
													8.12497e-05	-27.028	65497341
													2.28778e-06	-31.1641	65497344
													8.6461e-06	-29.4451	65497360
													4.03987e-07	-32.6603	65497373
													1.61981e-07	-33.522	65497375
													1.75678e-05	-28.9547	65497392
													1.99456e-06	-32.2368	65497400
													0.000187537	-27.6884	65497411
													8.29306e-05	-29.7504	65497420
													0.00017472	-29.7276	65497426
143	NW_024609883.1	69851766	69860204	minus	LOC120841458	120841458	protein-coding	XM_040212347.3	XP_040068281.1	B7PA68	(3R)-3-hydroxyacyl-CoA dehydrogenase	153	4.24005e-05	-30.184	69857950	4	HSD17B8 [Homo sapiens]	In mice, the Ke6 protein is a 17-beta-hydroxysteroid dehydrogenase that can regulate the concentration of biologically active estrogens and androgens. It is preferentially an oxidative enzyme and inactivates estradiol, testosterone, and dihydrotestosterone. However, the enzyme has some reductive activity and can synthesize estradiol from estrone. The protein encoded by this gene is similar to Ke6…	HSD17B8 (Hydroxysteroid 17-Beta Dehydrogenase 8) is a Protein Coding gene. Diseases associated with HSD17B8 include Dystonia, Childhood-Onset, With Optic Atrophy And Basal Ganglia Abnormalities and Israeli Tick Typhus. Among its related pathways are Estrone metabolism and Metabolism. Gene Ontology (GO) annotations related to this gene include oxidoreductase activity and 3-hydroxyacyl-CoA dehydrog…	Required for the solubility and assembly of the heterotetramer 3-ketoacyl-[acyl carrier protein] (ACP) reductase functional complex (KAR or KAR1) that forms part of the mitochondrial fatty acid synthase (mtFAS). Alpha-subunit of the KAR complex that acts as a scaffold protein required for the stability of carbonyl reductase type-4 (CBR4, beta-subunit of the KAR complex) and for its 3-ketoacyl-ACP…	AQY76863.2	3e-35	HSD17B8
													0.000217032	-25.9615	69858040
													0.000252597	-26.2467	69858054
													6.29999e-05	-27.7901	69858058
144	NW_024609884.1	49367416	49436399	minus	LOC8053303	8053303	protein-coding	XM_029970075.4	XP_029825935.1		ubiquitin-conjugating enzyme E2Q-like protein 1	293	0.00302216	-28.2564	49372246	6	FLJ25076 protein [Homo sapiens]	Enables ubiquitin conjugating enzyme activity. Predicted to be involved in protein polyubiquitination. Located in nucleoplasm and plasma membrane. [provided by Alliance of Genome Resources, Apr 2022]	UBE2QL1 (Ubiquitin Conjugating Enzyme E2 QL1) is a Protein Coding gene. Diseases associated with UBE2QL1 include Cri-Du-Chat Syndrome. Gene Ontology (GO) annotations related to this gene include ligase activity and ubiquitin conjugating enzyme activity. An important paralog of this gene is UBE2Q1.	Probable E2 ubiquitin-protein ligase that catalyzes the covalent attachment of ubiquitin to target proteins. May facilitate the monoubiquitination and degradation of MTOR and CCNE1 through interaction with FBXW7. ( U2QL1_HUMAN,A1L167 )	AAI27724.1	2e-72	UBE2QL1
													0.00624814	-25.6014	49372258
													0.00407923	-25.5198	49372265
													0.000905674	-28.3047	49372274
													0.000714279	-29.2793	49372276
													0.000664961	-26.5807	49372343
145	NW_024609884.1	52154196	52382997	plus	LOC8043039	8043039	protein-coding	XM_040216616.3	XP_040072550.1	B7PZR6	obscurin isoform X1	5043	0.000429224	-28.8288	52174646	2	titin isoform X12 [Homo sapiens]	This gene encodes a large abundant protein of striated muscle. The product of this gene is divided into two regions, a N-terminal I-band and a C-terminal A-band. The I-band, which is the elastic part of the molecule, contains two regions of tandem immunoglobulin domains on either side of a PEVK region that is rich in proline, glutamate, valine and lysine. The A-band, which is thought to act as a …	TTN (Titin) is a Protein Coding gene. Diseases associated with TTN include Myopathy, Myofibrillar, 9, With Early Respiratory Failure and Congenital Myopathy 5 With Cardiomyopathy. Among its related pathways are Response to elevated platelet cytosolic Ca2+ and Striated muscle contraction pathway. Gene Ontology (GO) annotations related to this gene include nucleic acid binding and identical protein…	Key component in the assembly and functioning of vertebrate striated muscles. By providing connections at the level of individual microfilaments, it contributes to the fine balance of forces between the two halves of the sarcomere. The size and extensibility of the cross-links are the main determinants of sarcomere extensibility properties of muscle. In non-muscle cells, seems to play a role in c…	XP_024308866.1	0	TTN
													0.00205157	-25.9633	52174654
146	NW_024609884.1	58383843	58417647	plus	LOC8032442	8032442	protein-coding	XM_029990970.3	XP_029846830.2	B7PWL6	N-acetyl-D-glucosamine kinase	341	1.99945e-22	-58.9178	58397532	25	unnamed protein product [Homo sapiens]	n/a	n/a	n/a	BAA91923.1	5e-93	no gene
													4.8674e-26	-58.5349	58397564
													2.48753e-27	-59.3414	58397573
													3.05613e-24	-55.2247	58397593
													7.03379e-29	-61.4103	58397601
													3.76778e-30	-64.2573	58397609
													7.72569e-27	-61.9707	58397620
													6.73524e-27	-61.6082	58397623
													1.90623e-29	-63.8286	58397632
													1.32411e-19	-53.2644	58397652
													1.50424e-14	-47.4008	58397655
													1.09589e-73	-78.2766	58399406
													9.91126e-65	-73.0186	58399414
													7.5738e-70	-75.8289	58399423
													2.69371e-72	-75.5337	58399427
													4.10562e-74	-77.175	58399431
													1.15032e-77	-79.1473	58399434
													1.62442e-75	-77.1568	58399441
													2.08954e-75	-77.4568	58399444
													6.29603e-78	-78.954	58399456
													3.47869e-75	-77.816	58399465
													4.07837e-61	-67.8284	58399478
													3.31241e-64	-70.962	58399480
													4.036e-47	-56.7892	58399490
													9.01229e-52	-67.2192	58399513
147	NW_024609884.1	68604597	68635642	minus	LOC121833801	121833801	protein-coding	XM_042287434.1	XP_042143368.1	B7PY05	uncharacterized protein LOC121833801	821	2.18969e-09	-35.2686	68629123	14	no significant similarity	n/a	n/a	n/a	n/a	n/a	n/a
													1.91501e-09	-33.8642	68629130
													8.47236e-13	-34.0341	68629165
													9.93919e-14	-37.2098	68629186
													1.87103e-17	-41.32	68629196
													2.1992e-11	-35.8163	68629200
													5.5483e-16	-41.072	68629216
													4.91404e-18	-43.5745	68629221
													3.39062e-12	-37.9943	68629230
													6.07581e-14	-39.1846	68629233
													1.67087e-14	-40.4651	68629237
													7.33126e-09	-35.0464	68629270
													5.85159e-09	-36.6384	68629274
													1.40218e-06	-33.9687	68629280
148	NW_024609884.1	86740906	86905084	plus	LOC115319638	115319638	protein-coding	XM_040216711.3	XP_040072645.1		proline-rich protein 36	649	2.96079e-05	-40.4071	86876073	9	no significant similarity	n/a	n/a	n/a	n/a	n/a	n/a
													3.53057e-05	-40.7407	86876075
													0.000281274	-37.1668	86876106
													5.06633e-06	-43.8848	86876115
													5.20672e-05	-39.5697	86876119
													0.000239252	-37.2517	86876123
													0.000865157	-34.5652	86876125
													8.07868e-05	-39.557	86876132
													5.66495e-05	-40.4133	86876138
149	NW_024609884.1	87435908	87485702	plus	LOC8054079	8054079	protein-coding	XM_029992481.4	XP_029848341.1	B7PL50	armadillo-like helical domain-containing protein 3	674	0.00111327	-27.4962	87470618	8	armadillo-like helical domain-containing protein 3 [Homo sapiens]	Involved in regulation of Golgi organization. Located in Golgi membrane and cytosol. [provided by Alliance of Genome Resources, Apr 2022]	ARMH3 (Armadillo Like Helical Domain Containing 3) is a Protein Coding gene.	Involved in GBF1 recruitment, Golgi maintenance and protein secretion. ( ARMD3_HUMAN,Q5T2E6)	NP_078817.2	0	ARMH3
													0.00157272	-26.9599	87470627
													0.00222327	-26.0123	87470633
													0.00355087	-25.7659	87470657
													0.000641414	-29.9506	87470673
													0.00137026	-28.2293	87470677
													0.00192734	-28.0444	87470694
													0.00344968	-27.8093	87470696
150	NW_024609884.1	92225377	92317540	minus	LOC8031039	8031039	protein-coding	XM_029990111.4	XP_029845971.3	B7PTA4	TBC1 domain family member 14 isoform X2	483	1.40279e-12	-45.1166	92272390	34	TBC1 domain family member 14 isoform b [Homo sapiens]	Enables protein kinase binding activity. Involved in negative regulation of autophagy; recycling endosome to Golgi transport; and regulation of autophagosome assembly. Located in several cellular components, including Golgi apparatus; autophagosome; and recycling endosome. [provided by Alliance of Genome Resources, Apr 2022]	TBC1D14 (TBC1 Domain Family Member 14) is a Protein Coding gene. Among its related pathways are Vesicle-mediated transport and Rab regulation of trafficking. Gene Ontology (GO) annotations related to this gene include protein kinase binding and GTPase activator activity. An important paralog of this gene is TBC1D12.	Plays a role in the regulation of starvation-induced autophagosome formation (PubMed:22613832). Together with the TRAPPIII complex, regulates a constitutive trafficking step from peripheral recycling endosomes to the early Golgi, maintaining the cycling pool of ATG9 required for initiation of autophagy. ( TBC14_HUMAN,Q9P2M4 )	NP_001106834.1	4e-160	TBC1D14
													1.12818e-13	-45.1111	92272419
													6.4209e-06	-27.3707	92272420
													1.34617e-14	-45.4398	92272432
													2.72732e-05	-25.2887	92272433
													2.66859e-14	-45.1678	92272435
													2.44868e-14	-45.4283	92272439
													5.02699e-16	-47.7147	92272453
													5.42208e-07	-28.1136	92272454
													1.98395e-15	-46.7274	92272456
													4.94563e-07	-28.3759	92272457
													1.76674e-15	-46.9182	92272459
													4.04934e-06	-26.4558	92272460
													8.63145e-14	-45.1611	92272461
													3.87254e-08	-31.2026	92272462
													2.65918e-14	-46.2428	92272463
													2.52537e-06	-27.4037	92272464
													5.03544e-15	-47.008	92272469
													6.49502e-07	-28.6457	92272470
													1.18512e-08	-35.9151	92272496
													1.27078e-09	-37.844	92272500
													2.06999e-05	-26.2142	92272501
													1.45448e-07	-36.3815	92272515
													1.56964e-08	-39.8231	92272543
													1.02057e-05	-32.7977	92272546
													9.86016e-06	-28.8793	92272547
													3.84678e-11	-45.6264	92272548
													2.16256e-05	-27.8427	92272549
													3.66427e-06	-37.3348	92272576
													0.000137499	-27.6335	92272577
													4.55091e-05	-33.8235	92272579
													0.000403747	-25.923	92272580
													4.66438e-05	-35.1509	92272600
													0.00389829	-26.7935	92272605
151	NW_024609884.1	92617129	92740084	plus	LOC8029686	8029686	protein-coding	XM_029995512.4	XP_029851372.1		WW domain-containing adapter protein with coiled-coil homolog isoform X1	533	0.000170723	-33.8529	92699854	4	WAC protein [Homo sapiens]	The protein encoded by this gene contains a WW domain, which is a protein module found in a wide range of signaling proteins. This domain mediates protein-protein interactions and binds proteins containing short linear peptide motifs that are proline-rich or contain at least one proline. This gene product shares 94% sequence identity with the WAC protein in mouse, however, its exact function is n…	WAC (WW Domain Containing Adaptor With Coiled-Coil) is a Protein Coding gene. Diseases associated with WAC include Desanto-Shinawi Syndrome and Branchial Cleft Anomalies. Among its related pathways are Protein ubiquitination and Metabolism of proteins. Gene Ontology (GO) annotations related to this gene include chromatin binding and RNA polymerase II complex binding.	Acts as a linker between gene transcription and histone H2B monoubiquitination at 'Lys-120' (H2BK120ub1) (PubMed:21329877). Interacts with the RNA polymerase II transcriptional machinery via its WW domain and with RNF20-RNF40 via its coiled coil region, thereby linking and regulating H2BK120ub1 and gene transcription (PubMed:21329877). Regulates the cell-cycle checkpoint activation in response to…	AAH10356.1	2e-34	WAC
													3.43084e-05	-34.8196	92699882
													0.00109791	-27.8808	92699887
													0.000896468	-28.1943	92699901
152	NW_024609884.1	94366859	94438729	plus	LOC8037647	8037647	protein-coding	XM_002405429.4	XP_002405473.3		actin-interacting protein 1	602	2.96837e-05	-30.2694	94419023	4	WD repeat-containing protein 1 isoform 1 [Homo sapiens]	This gene encodes a protein containing 9 WD repeats. WD repeats are approximately 30- to 40-amino acid domains containing several conserved residues, mostly including a trp-asp at the C-terminal end. WD domains are involved in protein-protein interactions. The encoded protein may help induce the disassembly of actin filaments. Two transcript variants encoding different isoforms have been found fo…	WDR1 (WD Repeat Domain 1) is a Protein Coding gene. Diseases associated with WDR1 include Periodic Fever, Immunodeficiency, And Thrombocytopenia Syndrome and Intellectual Developmental Disorder, Autosomal Dominant 61. Among its related pathways are Response to elevated platelet cytosolic Ca2+ and Hypertrophy model. Gene Ontology (GO) annotations related to this gene include actin binding.	Induces disassembly of actin filaments in conjunction with ADF/cofilin family proteins (PubMed:15629458, 27557945, 29751004). Enhances cofilin-mediated actin severing (By similarity). Involved in cytokinesis. Involved in chemotactic cell migration by restricting lamellipodial membrane protrusions (PubMed:18494608). Involved in myocardium sarcomere organization. Required for cardiomyocyte growth a…	NP_059830.1	0	WDR1
													6.35902e-05	-26.0341	94419028
													0.000131977	-26.7598	94419032
													0.000208182	-26.2069	94419041
153	NW_024609884.1	95313061	95383362	minus	LOC8030905	8030905	protein-coding	XM_029985848.4	XP_029841708.1	B7PT04	phosphoacetylglucosamine mutase isoform X1	546	0.00798757	-26.2556	95360563	1	unnamed protein product [Homo sapiens]	This gene encodes a member of the phosphohexose mutase family. The encoded protein mediates both glycogen formation and utilization by catalyzing the interconversion of glucose-1-phosphate and glucose-6-phosphate. A non-synonymous single nucleotide polymorphism in this gene may play a role in resistance to diabetic nephropathy and neuropathy. Alternatively spliced transcript variants encoding mul…	PGM3 (Phosphoglucomutase 3) is a Protein Coding gene. Diseases associated with PGM3 include Immunodeficiency 23 and Hyper Ige Syndrome. Among its related pathways are Synthesis of substrates in N-glycan biosythesis and Metabolism of proteins. Gene Ontology (GO) annotations related to this gene include magnesium ion binding and phosphoglucomutase activity. An important paralog of this gene is PGM2.	Catalyzes the conversion of GlcNAc-6-P into GlcNAc-1-P during the synthesis of uridine diphosphate/UDP-GlcNAc, a sugar nucleotide critical to multiple glycosylation pathways including protein N- and O-glycosylation. ( AGM1_HUMAN,O95394 )	BAG51190.1	0	PGM3
154	NW_024609884.1	101089165	101181306	plus	LOC8025164	8025164	protein-coding	XM_040501828.2	XP_040357762.1	B7P625	protein l(2)37Cc isoform X1	257	0.00424481	-25.9873	101141524	3	prohibitin 1 isoform 1 [Homo sapiens]	This gene is evolutionarily conserved, and its product is proposed to play a role in human cellular senescence and tumor suppression. Antiproliferative activity is reported to be localized to the 3' UTR, which is proposed to function as a trans-acting regulatory RNA. Several pseudogenes of this gene have been identified. Alternative splicing results in multiple transcript variants. [provided by R…	PHB1 (Prohibitin 1) is a Protein Coding gene. Diseases associated with PHB1 include Breast Cancer and Chikungunya. Among its related pathways are Signaling downstream of RAS mutants and MAPK family signaling cascades. An important paralog of this gene is PHB2.	Protein with pleiotropic attributes mediated in a cell-compartment- and tissue-specific manner, which include the plasma membrane-associated cell signaling functions, mitochondrial chaperone, and transcriptional co-regulator of transcription factors in the nucleus (PubMed:11302691, 20959514, 28017329, 31522117). Plays a role in adipose tissue and glucose homeostasis in a sex-specific manner (By s…	NP_001268425.1	3e-145	PHB1
													0.000894601	-29.3576	101141548
													0.00519652	-26.3553	101141550
155	NW_024609885.1	715905	718334	minus	LOC120847351	120847351	protein-coding	XM_040219064.1	XP_040074998.1	B7P6H8	uncharacterized protein LOC120847351	809	2.18e-06	-25.6161	716056	1	no significant similarity	n/a	n/a	n/a	n/a	n/a	n/a
156	NW_024609885.1	719557	734503	plus	LOC115321521	115321521	protein-coding	XM_040220239.3	XP_040076173.1		uncharacterized protein LOC115321521 isoform X1	404	3.56848e-17	-36.5788	725229	5	no significant similarity	n/a	n/a	n/a	n/a	n/a	n/a
													1.30148e-19	-38.1308	725238
													7.5137e-17	-35.2522	725259
													5.0476e-21	-32.2656	725295
													1.4807e-26	-34.8155	725312
157	NW_024609912.1	68255	103515	plus	LOC115330727	115330727	protein-coding	XM_029992721.2	XP_029848581.2		inner centromere protein A	726	0.00319101	-25.9116	69449	49	inner centromere protein isoform X2 [Homo sapiens]	In mammalian cells, 2 broad groups of centromere-interacting proteins have been described: constitutively binding centromere proteins and 'passenger,' or transiently interacting, proteins (reviewed by Choo, 1997). The constitutive proteins include CENPA (centromere protein A; MIM 117139), CENPB (MIM 117140), CENPC1 (MIM 117141), and CENPD (MIM 117142). The term 'passenger proteins' encompasses a …	INCENP (Inner Centromere Protein) is a Protein Coding gene. Diseases associated with INCENP include Juvenile Nephronophthisis and Nephronophthisis. Among its related pathways are EML4 and NUDC in mitotic spindle formation and Separation of Sister Chromatids.	Component of the chromosomal passenger complex (CPC), a complex that acts as a key regulator of mitosis. The CPC complex has essential functions at the centromere in ensuring correct chromosome alignment and segregation and is required for chromatin-induced microtubule stabilization and spindle assembly. Acts as a scaffold regulating CPC localization and activity. The C-terminus associates with A…	XP_011543299.1	5e-17	INCENP
													0.000415197	-32.5758	80100
													0.00774231	-27.093	80102
													0.00568199	-25.8039	80242
													0.000191817	-33.2707	80435
													2.47506e-05	-36.0641	80438
													5.59606e-07	-42.0427	80447
													1.00397e-05	-38.1074	80450
													4.72292e-06	-39.3623	80454
													1.24749e-06	-40.6629	80459
													5.0246e-05	-35.7971	80462
													2.26535e-08	-45.9439	80466
													2.53989e-06	-40.3595	80474
													7.37873e-05	-34.3791	80484
													2.01471e-05	-36.1988	80489
													8.43093e-06	-37.9139	80497
													1.55415e-05	-36.9343	80507
													1.70663e-05	-36.4243	80509
													3.93599e-05	-34.2724	80520
													0.000650326	-29.5464	80548
													0.00107792	-28.9756	80571
													2.69617e-05	-35.864	80576
													1.8754e-07	-38.6842	101551
													4.68173e-06	-33.5412	101564
													5.52926e-08	-36.5714	101573
													8.95063e-07	-35.4742	101580
													2.28049e-07	-36.9447	101627
													6.90049e-07	-34.5794	101634
													5.83229e-06	-32.5302	101639
													0.000106465	-30.1831	101649
													3.77285e-06	-35.3042	101651
													0.000212702	-29.6907	101673
													0.000627795	-27.9437	101676
													5.97661e-05	-31.4287	101686
													1.54712e-05	-33.6115	101694
													3.60918e-08	-39.6253	101734
													2.90051e-09	-41.6778	101744
													3.51566e-08	-38.4553	101749
													3.58126e-08	-37.5951	101752
													1.74983e-07	-35.9966	101755
													4.42203e-07	-35.8557	101781
													4.9213e-11	-44.6788	101784
													2.16879e-06	-34.456	101914
													2.40049e-05	-32.2436	101919
													1.53326e-06	-34.3252	101921
													2.39175e-06	-34.1584	101929
													6.69318e-06	-33.7354	101932
													5.9063e-05	-30.4742	101938
													3.34987e-05	-32.3296	101948
158	NW_024609948.1	1450832	1465535	minus	LOC121834003	121834003	protein-coding	XM_042287732.1	XP_042143666.1		uncharacterized protein LOC121834003	472	2.89e-07	-25.0138	1455273	1	no significant similarity	n/a	n/a	n/a	n/a	n/a	n/a
159	NW_024610040.1	69993	145444	minus	LOC120849061	120849061	protein-coding	XM_040221152.3	XP_040077086.1	B7QLV6	uncharacterized protein LOC120849061 isoform X1	762	0.000220401	-33.6897	88803	7	no significant similarity	n/a	n/a	n/a	n/a	n/a	n/a
													1.10514e-07	-40.4212	88808
													3.78885e-06	-37.5461	88828
													2.00209e-07	-40.3412	88851
													2.07098e-06	-37.7701	88859
													9.1809e-05	-30.9768	88895
													0.00216162	-26.6667	88897
160	NW_024610056.1	146248	164579	plus	LOC115319827	115319827	protein-coding	XM_029979829.4	XP_029835689.3		ubiquinol-cytochrome-c reductase complex assembly factor 1 isoform X1	257	0.00286055	-29.2202	162363	1	ubiquinol-cytochrome c reductase complex assembly factor 1 isoform c [Homo sapiens]	This gene encodes a transmembrane protein that is structurally similar to the mouse basic fibroblast growth factor repressed ZIC-binding protein. In mouse this protein may be involved in fibroblast growth factor regulated growth control. In humans, polymorphisms in this gene are associated with variation in human height and osteoarthritis. Alternate splicing results in multiple transcript variant…	UQCC1 (Ubiquinol-Cytochrome C Reductase Complex Assembly Factor 1) is a Protein Coding gene. Diseases associated with UQCC1 include Bardet-Biedl Syndrome 18 and Mitochondrial Disease. Among its related pathways are Respiratory electron transport and Complex III assembly.	Required for the assembly of the ubiquinol-cytochrome c reductase complex (mitochondrial respiratory chain complex III or cytochrome b-c1 complex). Involved in cytochrome b translation and/or stability. ( UQCC1_HUMAN,Q9NVA1 )	NP_001171906.1	2e-39	UQCC1
161	NW_024610108.1	1515047	1555392	plus	LOC120847056	120847056	protein-coding	XM_042288111.1	XP_042144045.1		uncharacterized protein LOC120847056	107	0.000976161	-31.2469	1551460	4	no significant similarity	n/a	n/a	n/a	n/a	n/a	n/a
													2.06641e-06	-42.0168	1551474
													4.35537e-09	-49.7802	1551478
													3.57818e-08	-47.5616	1551480
162	NW_024610167.1	2567318	2569165	plus	LOC120844778	120844778	protein-coding	XM_040216726.1	XP_040072660.1		uncharacterized protein LOC120844778	615	0.000200492	-25.5419	2568412	2	no significant similarity	n/a	n/a	n/a	n/a	n/a	n/a
													0.00088807	-25.5081	2568476
163	NW_024610169.1	125379	236015	minus	LOC8036567	8036567	protein-coding	XM_040206520.2	XP_040062454.2	B7QH60	flavin-containing monooxygenase 5-like	544	6.05506e-06	-32.9545	141404	7	flavin containing monooxygenase 5 variant [Homo sapiens]	Metabolic N-oxidation of the diet-derived amino-trimethylamine (TMA) is mediated by flavin-containing monooxygenase and is subject to an inherited FMO3 polymorphism in man resulting in a small subpopulation with reduced TMA N-oxidation capacity resulting in fish odor syndrome Trimethylaminuria. Three forms of the enzyme, FMO1 found in fetal liver, FMO2 found in adult liver, and FMO3 are encoded b…	FMO5 (Flavin Containing Dimethylaniline Monoxygenase 5) is a Protein Coding gene. Diseases associated with FMO5 include Trimethylaminuria and Chromosome 1Q21.1 Deletion Syndrome. Among its related pathways are Metapathway biotransformation Phase I and II and Busulfan Pathway, Pharmacodynamics. Gene Ontology (GO) annotations related to this gene include oxidoreductase activity and NADP binding. An…	Acts as a Baeyer-Villiger monooxygenase on a broad range of substrates. Catalyzes the insertion of an oxygen atom into a carbon-carbon bond adjacent to a carbonyl, which converts ketones to esters (PubMed:20947616, 26771671, 28783300). Active on diverse carbonyl compounds, whereas soft nucleophiles are mostly non- or poorly reactive (PubMed:26771671, 7872795). In contrast with other forms of FMO …	BAD96448.1	9e-147	FMO5
													0.000542762	-25.7302	141414
													1.67665e-05	-29.5139	141421
													4.52761e-06	-29.8812	141427
													3.16514e-06	-30.9958	141432
													0.000161381	-25.4464	141435
													3.68438e-06	-29.906	141444

## Sheet: Table S7.Hypo_regions_nano
Table S7. Regions that are hypermethylated in TX relative to MN using nanopore sequencing.
		Gene information						Protein information					Methylation information
Gene #	Chromosome	Start region	End region	Oritentation	Symbol	Gene ID	Gene type	Transcript accession	Protein accession	Protein ID	Protein name	Protein length	qvalue	meth.diff	# of methylated sites
1	NW_024609835	114398001	114398100	*	LOC121832958	121832958	protein_coding	XM_042289563.1	XP_042145497.1		gastrula zinc finger protein XlCGF49.1-like	206	2.04491e-47	-60.3659	99
2	NW_024609835	239911801	239911900	*	LOC8033550	8033550	protein_coding	XM_042291012.1	XP_042146946.1	B7PZ82	cubilin	3668	1.49765e-23	-52.2388	70
3	NW_024609835	247272301	247272400	*	LOC8025626	8025626	protein_coding	XM_029971324.3	XP_029827184.2	A0A4D5RK83	sortilin-related receptor	2129	1.3662e-33	-51.1814	167
4	NW_024609836	79498601	79498700		LOC120846781	120846781	protein_coding	XM_040218656.3	XP_040074590.1		uncharacterized LOC120846781	883	4.37774e-19	-51.4371	171
5	NW_024609837	35023501	35023600	*	LOC8036612	8036612	protein_coding	XM_029973219.3	XP_029829079.2	A0A4D5RJY1	basic proline-rich protein	1129	5.71299e-30	-64	80
6	NW_024609837	88211501	88211600	*	LOC8036583	8036583	protein_coding	XM_029992795.3	XP_029848655.2	A0A4D5RKJ3	gamma-tubulin complex component 4	639	3.18665e-31	-54.7746	80
7	NW_024609838	90901	91000	*	LOC121835319	121835319	protein_coding	XM_042289353.1	XP_042145287.1		uncharacterized LOC121835319	554	5.11701e-32	-54.9506	181
8	NW_024609839	90418201	90418300	*	LOC115318010	115318010	protein_coding	XM_040218874.3	XP_040074808.1		uncharacterized LOC115318010	559	3.37222e-28	-50.3268	77
9	NW_024609839	48633001	48633100		LOC115324699	115324699	protein_coding	XM_040213359.1	XP_040069293.1		hyaluronan-mediated motility receptor	741	4.66436e-29	-51.7883	164
10	NW_024609846	53348301	53348400	*	LOC120845896	120845896	protein_coding	XM_040217458.2	XP_040073392.2	B7PKV7	Probable tRNA N6-adenosine threonylcarbamoyltransferase Tcs3	335	1.35993e-30	-66.2433	150
11	NW_024609846	207971101	207971200	*	LOC8051557	8051557	protein_coding	XM_040208562.3	XP_040064496.1	B7PPI2	ran-specific GTPase-activating protein	197	2.72608e-20	-54.1861	77
12	NW_024609848	538401	538500	*	LOC121836241	121836241	protein_coding	XM_042291085.1	XP_042147019.1		hyaluronan-mediated motility receptor-like	605	3.11751e-20	-55.2419	95
13	NW_024609857	22961701	22961800	*	LOC8025681	8025681	protein_coding	XM_029985946.4	XP_029841806.2	B7P7A4	importin-9	1021	4.75744e-28	-57.4074	93
14	NW_024609857	57926201	57926300	*	LOC8025090	8025090	protein_coding	XM_042291880.1	XP_042147814.1	B7P5W6	uncharacterized LOC8025090	86	2.78541e-21	-52.4791	153
15	NW_024609857	122709001	122709100	*	LOC8041333	8041333	protein_coding	XM_040219496.1	XP_040075430.1	B7QHH5	peptidase M20 domain-containing protein 2-like	405	5.60447e-53	-66.2308	92
16	NW_024609857	129031401	129031500	*	LOC121836806	121836806	protein_coding	XM_042292026.1	XP_042147960.1	A0A4D5RXY1	uncharacterized protein K02A2.6-like	1312	2.30315e-22	-53.911	90
17	NW_024609857	116189101	116189200		LOC120847875	120847875	protein_coding	XM_040219792.2	XP_040075726.1		uncharacterized LOC120847875	220	1.7167e-33	-56.6926	133
18	NW_024609879	143796801	143796900	*	LOC8030353	8030353	protein_coding	XM_040206728.3	XP_040062662.2	B7PRM8	inactivation no afterpotential E	1082	3.18743e-40	-76.3313	118
19	NW_024609881	8133401	8133500	*	LOC115309029	115309029	protein_coding	XM_029967168.4	XP_029823028.2	A0A4D5RZS7	GDSL esterase/lipase CPRD49-like	219	3.34189e-22	-59.5745	114
20	NW_024609881	97451601	97451700	*	LOC120849147	120849147	protein_coding	XM_040221296.3	XP_040077230.3		uncharacterized LOC120849147	560	4.57704e-28	-51.6129	64
21	NW_024609882	77347101	77347200	*	LOC8029213	8029213	protein_coding	XM_029968446.4	XP_029824306.2	B7PHX9	protein archease-like	182	4.13741e-38	-67.696	95
22	NW_024609882	76586201	76586300		LOC121045678	121045678	protein_coding	XM_042286282.1	XP_042142216.1		uncharacterized LOC121045678	93	8.83234e-43	-81.203	133
23	NW_024609883	66859601	66859700	*	LOC8025830	8025830	protein_coding	XM_042287015.1	XP_042142949.1	B7P7M8	enoyl-CoA delta isomerase 2	378	9.75719e-24	-62.786	90
24	NW_024609884	2810501	2810600	*	LOC8041399	8041399	protein_coding	XM_002414639.5	XP_002414684.2	B7QHM7	uncharacterized protein C18orf19 homolog B	231	3.1341e-25	-54.9266	94
25	NW_024609884	7344101	7344200	*	LOC120836654	120836654	protein_coding	XM_040205652.3	XP_040061586.1	A0A4D5RD86	uncharacterized LOC120836654	536	1.44731e-28	-53.7999	116
26	NW_024609884	78757501	78757600		LOC115308773	115308773	protein_coding	XM_029966843.3	XP_029822703.2		zinc finger protein OZF-like	442	3.19984e-28	-61.1071	119
27	NW_024609904	142801	142900	*	LOC120849306	120849306	protein_coding	XM_040221513.2	XP_040077447.1		zinc finger protein 501-like	477	8.49932e-27	-58.2792	94
28	NW_024609976	1748001	1748100		LOC115333191	115333191	protein_coding	XM_040221333.3	XP_040077267.1		uncharacterized LOC115333191	378	9.85323e-27	-51.8444	93
29	NW_024610212	84801	84900	*	LOC121834626	121834626	protein_coding	XM_042288340.1	XP_042144274.1	A0A4D5RWL7	piggyBac transposable element-derived protein 3-like	559	6.81797e-23	-55.354	106

## Sheet: Table S8.Hyper_regions_nano
Table S8. Regions that are hypermethylated in MN compared to TX using nanopore sequencing.
		Gene information						Protein information					Methylation information
Gene #	Chromosome	Begin region	End region	Orientation	Symbol	Gene ID	Gene Type	Transcripts accession	Protein accession	Protein ID	Protein name	Protein length	qvalue	meth.diff	# of methylated sites
1	NW_024609835	61971101	61971200	*	LOC8041639	8041639	protein_coding	XM_029972231.4	XP_029828082.3	A0A4D5RQD3	rho guanine nucleotide exchange factor 11	1831	5.90917e-41	74.0987	193
2	NW_024609835	200915701	200915800		LOC121837949	121837949	protein_coding	XM_042293866.1	XP_042149800.1		uncharacterized LOC121837949	208	2.1962e-35	61.4035	70
3	NW_024609836	37874501	37874600	*	LOC8033856	8033856	protein_coding	XM_042287882.1	XP_042143816.1		uncharacterized LOC8033856	641	4.11201e-22	51.8046	107
4	NW_024609837	57663501	57663600	*	LOC120847835	120847835	protein_coding	XM_040219736.3	XP_040075670.2	B7QIQ8	mitochondrial RNA pseudouridine synthase Rpusd4	376	2.18483e-21	50.9091	84
5	NW_024609846	17909201	17909300	*	LOC115321847	115321847	protein_coding	XM_040222180.1	XP_040078114.1	A0A4D5RZS7	GDSL esterase/lipase CPRD49-like	220	5.24828e-30	54.5735	89
6	NW_024609846	59627501	59627600	*	LOC8041886	8041886	protein_coding	XM_029983694.2	XP_029839554.2	B7QIU1	monocarboxylate transporter 9	442	9.20289e-27	50.62	131
7	NW_024609846	145062901	145063000	*	LOC120848754	120848754	protein_coding	XM_040220770.2	XP_040076704.2	B7PD65	uncharacterized LOC120848754	592	7.67224e-29	52.8602	109
8	NW_024609846	106366201	106366300		LOC115314849	115314849	protein_coding	XM_040223351.2	XP_040079285.1	B7PAN6	uncharacterized LOC115314849	185	1.795e-33	63.3588	83
9	NW_024609857	90576901	90577000	*	LOC8038680	8038680	protein_coding	XM_029983111.4	XP_042143973.1		tRNA (uracil(54)-C(5))-methyltransferase homolog-B	287	1.36488e-25	62.0396	123
10	NW_024609857	165125101	165125200	*	LOC120846315	120846315	protein_coding	XM_040218044.2	XP_040073978.1	A0A4D5RCB2	histone H3-like centromeric protein A	159	4.32244e-25	52.0065	142
11	NW_024609857	108377101	108377200		LOC115316448	115316448	protein_coding	XM_040209799.3	XP_040065733.1		uncharacterized LOC115316448	350	1.03507e-21	54.939	188
12	NW_024609868	97237801	97237900	*	LOC8028441	8028441	protein_coding	XM_029981002.4	XP_029836862.2	A0A4D5RMV4	Molybdenum cofactor sulfurase, C-terminal	324	9.47315e-22	51.3512	98
13	NW_024609868	146863501	146863600	*	LOC120850061	120850061	protein_coding	XM_040222400.3	XP_040078334.2	B7QIV7	protein RFT1 homolog	539	3.78346e-32	52.9126	109
14	NW_024609868	172635801	172635900	*	LOC115315691	115315691	protein_coding	XM_042292978.1	XP_042149248.1	A0A4D5RMJ0	alpha-(1,6)-fucosyltransferase-like	525	2.0673e-50	84.7328	111
15	NW_024609879	122157701	122157800	*	LOC115320944	115320944	protein_coding	XM_042293414.1	XP_042149348.1	B7PQH2	glutamate [NMDA] receptor subunit 1	918	2.29499e-32	60.1351	89
16	NW_024609879	136628101	136628200	*	LOC115331446	115331446	protein_coding	XM_040218594.1	XP_040074528.1		uncharacterized LOC115331446	420	4.18242e-20	50.2165	71
17	NW_024609880	65166801	65166900	*	LOC8027481	8027481	protein_coding	XM_042294362.1	XP_042150296.1	B7PBM1	potassium voltage-gated channel subfamily H member 7	1040	3.43128e-40	69.8529	95
18	NW_024609880	86581901	86582000	*	LOC8052416	8052416	protein_coding	XM_040222549.2	XP_040078483.2	B7PQY1	hemicentin-2	593	3.42164e-37	54.9223	106
19	NW_024609881	3377301	3377400	*	LOC8032153	8032153	protein_coding	XM_040206051.2	XP_040061985.2	B7PK76	Polyketide synthase, dehydratase domain	2495	2.83216e-18	55.0433	98
20	NW_024609881	4269901	4270000	*	LOC8037792	8037792	protein_coding	XM_029993269.4	XP_029849130.3	B7Q990	protein argonaute-2	988	1.94118e-30	56.5868	202
21	NW_024609881	22505001	22505100	*	LOC120849079	120849079	protein_coding	XM_040221185.1	XP_040077119.1		zinc finger protein 519-like	255	3.04741e-24	60.9491	106
22	NW_024609881	111029201	111029300	*	LOC8023472	8023472	protein_coding	XM_029981196.4	XP_029837056.3	B7P230	protein argonaute-2	989	1.80798e-20	58.5353	85
23	NW_024609881	55746901	55747000		LOC121838300	121838300	protein_coding	XM_042294469.1	XP_042150403.1		uncharacterized LOC121838300	151	1.73227e-30	63.1677	122
24	NW_024609883	3837601	3837700	*	LOC8050777	8050777	protein_coding	XM_029975546.4	XP_029831406.2	B7PN45	laminin subunit alpha	3607	4.3984e-31	50.5335	265
25	NW_024609883	67774901	67775000	*	LOC115322922	115322922	protein_coding	XM_029983286.3	XP_029839146.3	A0A4D5RJE8	1-phosphatidylinositol 4,5-bisphosphate phosphodiesterase epsilon-1	629	3.90438e-44	64.5536	148
26	NW_024609883	92728601	92728700	*	LOC8040683	8040683	protein_coding	XM_042287060.1	XP_042142994.1	B7QFY9	A disintegrin and metalloproteinase with thrombospondin motifs 9	1389	4.00685e-33	69.1268	108
27	NW_024609883	104062601	104062700	*	LOC121833415	121833415	protein_coding	XM_042286676.1	XP_042142610.1		protein S-Myc-like	328	1.96933e-21	56.4871	117
28	NW_024609883	106499001	106499100	*	LOC8032590	8032590	protein_coding	XM_002410342.5	XP_002410387.1	B7PWY7	ras-related protein Rab-23-like	233	1.15291e-29	51.4784	171
29	NW_024609883	107161901	107162000	*	LOC8033910	8033910	protein_coding	XM_040205332.3	XP_040061266.1	B7Q017	putative deoxyribonuclease TATDN1	311	5.20647e-30	59.5747	85
30	NW_024609883	17293901	17294000		LOC121833530	121833530	protein_coding	XM_042286926.1	XP_042142860.1	B7PAU1	uncharacterized LOC121833530	222	5.80425e-37	52.2132	134
31	NW_024609884	17063501	17063600	*	LOC8024862	8024862	protein_coding	XM_042287298.1	XP_042143232.1	B7P5E0	Formin homology 2 domain containing	2842	6.1873e-31	52.0892	146
32	NW_024609884	24655101	24655200	*	LOC8041136	8041136	protein_coding	XM_029978612.4	XP_029834473.3	B7QH15	solute carrier family 12 member kcc	1259	2.34961e-21	51.273	157
33	NW_024609948	1238601	1238700	*	LOC121833992	121833992	protein_coding	XM_042287725.1	XP_042143659.1	B7Q7X6	laminin subunit alpha-like	1409	7.74314e-83	54.6328	1888
34	NW_024610141	270501	270600	*	LOC121834545	121834545	protein_coding	XM_042288251.1	XP_042144185.1		trypsin-1-like	137	2.46028e-58	75.5639	201
